# Supplementary material for: Viral Infection Leads to a Unique Suite of Allelopathic Chemical Signals in Three Diatom Host–Virus Pairs
Source: MDPI journal article supplement (doi:10.3390/md22050228), 2024-05-17
Supplement: s1 [file s1]

Table S9. Authentic standards used for the retention time model. Fatty acid, polyunsaturated aldehyde, non-volatile oxylipin standards with the common name or abbreviation, the structural level annotation assigned by the lipidomics pipeline presented here, and the retention time (RT) of each compound. Comparisons to the RT of the authentic standards were used to assign putative annotations to features in the dissolved lipidome.

| Authentic Standard                       | Common Abbreviation/<br>Name | Structural Level Annotation | RT   |
|------------------------------------------|------------------------------|-----------------------------|------|
| Octanoic acid                            | --                           | FFA 8:0                     | 2.65 |
| Arachidonic acid                         | AA                           | FFA 20:4                    | 8.09 |
| Docosahexaenoic acid                     | DHA                          | FFA 22:6                    | 7.71 |
| 9-Hydroperoxy octadecadienoic acid       | 9-HpODE                      | NVO 18:2 2O                 | 5.44 |
| 13-Hydroperoxy octadecadienoic acid      | 13-HpODE                     | NVO 18:2 2O                 | 5.44 |
| 9-Hydroxy octadecatrienoic acid          | 9-HOTrE                      | NVO 18:3 1O                 | 4.02 |
| 13-Hydroperoxy octadecatrienoic acid     | 13-HpOTrE                    | NVO 18:3 2O                 | 4.65 |
| 9-Hydroperoxy octadecatrienoic acid      | 9-HpOTrE                     | NVO 18:3 2O                 | 4.28 |
| 15-Hydroxy eicosatrienoic acid           | 15-HETrE                     | NVO 20:3 1O                 | 6.11 |
| 15-Hydroxy eicosatetraenoic acid         | 15-HETE                      | NVO 20:4 1O                 | 5.43 |
| 5-Hydroperoxy eicosatetraenoic acid      | 5-HpETE                      | NVO 20:4 2O                 | 5.01 |
| 12-Hydroperoxy eicosatetraenoic acid     | 12-HpETE                     | NVO 20:4 2O                 | 5.95 |
| 15-Hydroperoxy eicosatetraenoic acid     | 15-HpETE                     | NVO 20:4 2O                 | 5.73 |
| 5,6-Dihydroxy eicosatetraenoic acid      | 5,6-diHETE                   | NVO 20:4 2O                 | 3.48 |
| 14,15- Dihydroxy eicosatetraenoic acid   | 14,15-diHETE                 | NVO 20:4 2O                 | 3.00 |
| 5,12- Dihydroxy eicosatetraenoic acid    | Leukotriene B4               | NVO 20:4 2O                 | 2.89 |
| 15-Hydroxy eicosapentaenoic acid         | 15-HEPE                      | NVO 20:5 1O                 | 4.56 |
| 5,6,15- Trihydroxy eicosapentaenoic acid | Lipoxin A5                   | NVO 20:5 3O                 | 1.72 |
| Heptadienal                              | --                           | PUA 7:2                     | 1.90 |
| Octadienal                               | --                           | PUA 8:2                     | 2.28 |
| Nonadienal                               | --                           | PUA 9:2                     | 2.69 |
| Decadienal                               | DD                           | PUA 10:2                    | 3.65 |
