# Supplementary material for: Viral Infection Leads to a Unique Suite of Allelopathic Chemical Signals in Three Diatom Host–Virus Pairs
Source: Mar Drugs. 2024 May 17;22(5):228. doi: 10.3390/md22050228 (PMC11123003; doi:10.3390/md22050228)
Supplement: Supplementary file 1 [file marinedrugs-22-00228-s001.zip]

Archive with 13 entries (13 files):
- Marine Drugs Supplemental Figures May 2024.pdf
- Marine Drugs Supplemental Table S1 Oxylipidome.xlsx
- Supplemental File S1a oxylipin_CFMID.msp
- Supplemental File S1b C20_3_CFMID.msp
- Supplemental File S1c oxylipin_standard_BRE.msp
- Supplemental Table S2 Annotation Table for CT DNAV March 2024.xlsx
- Supplemental Table S3 Annotation Table for CT RNAV March 2024.xlsx
- Supplemental Table S4  Annotation Table for CS RNAV March 2024b.xlsx
- Supplemental Table S5 TIC ANOVA.xlsx
- Supplemental Table S6 positional annotation table March 2024.xlsx
- Supplemental Table S7 unique Venn.xlsx
- Supplemental table S8 oxylipin_standard_frag_vs_CFMID.xlsx
- Supplemental Table S9 Authentic standard for RT model.pdf
