# Supplementary material for: Viral Infection Leads to a Unique Suite of Allelopathic Chemical Signals in Three Diatom Host–Virus Pairs
Source: Mar Drugs. 2024 May 17;22(5):228. doi: 10.3390/md22050228 (PMC11123003; doi:10.3390/md22050228)
Supplement: Supplementary file 1 [file marinedrugs-22-00228-s001.zip › Marine Drugs Supplemental Table S1 Oxylipidome.xlsx]

## Sheet: Sheet1
Table S1. Dissolved oxylipidome (free fatty acids and oxylipins) from experiments infecting two diatom hosts Chaetoceros socialis (Cs) and Chaetoceros tenuissimus (Ct) with CsfrRNA virus and, CtenDNA virus and CtenRNA virus, respectively. The volume normalized and recovery standard normalized peak area is reported below.
	Cs_L4_A	Cs_L4_B	Cs_L4_C	Ct_2.10_A	Ct_2.10_B	Ct_2.10_C	Ct_T0_A	Ct_T0_B	Ct_T0_C	Ct_T1_A	Ct_T1_B	Ct_T1_C	Ct_T3_A	Ct_T3_B	Ct_T3_C	Ct_T4_A	Ct_T4_B	Ct_T4_C	CtDNAv_T1_A	CtDNAv_T1_B	CtDNAv_T1_C	CtDNAv_T3_A	CtDNAv_T3_B	CtDNAv_T3_C	CtDNAv_T4_A	CtDNAv_T4_B	CtDNAv_T4_C	CtRNAv_T1_A	CtRNAv_T1_B	CtRNAv_T1_C	CtRNAv_T3_A	CtRNAv_T3_B	CtRNAv_T3_C	Cs_T0_A	Cs_T0_B	Cs_T0_C	Cs_T1_A	Cs_T1_B	Cs_T1_C	Cs_T3_A	Cs_T3_B	Cs_T3_C	CsRNAv_T1_A	CsRNAv_T1_B	CsRNAv_T1_C	CsRNAv_T3_A	CsRNAv_T3_B	CsRNAv_T3_C
	Cs_e_Decline	Cs_e_Decline	Cs_e_Decline	Ct_e_Decline	Ct_e_Decline	Ct_e_Decline	Ct_a_Early_Exp	Ct_a_Early_Exp	Ct_a_Early_Exp	Ct_a_Early_Exp	Ct_a_Early_Exp	Ct_a_Early_Exp	Ct_c_Late Exp	Ct_c_Late Exp	Ct_c_Late Exp	Ct_d_Stat	Ct_d_Stat	Ct_d_Stat	Ct_f_Early_Vir	Ct_f_Early_Vir	Ct_f_Early_Vir	Ct_g_Mid_Vir	Ct_g_Mid_Vir	Ct_g_Mid_Vir	Ct_h_Late_Vir	Ct_h_Late_Vir	Ct_h_Late_Vir	Ct_f_Early_Vir	Ct_f_Early_Vir	Ct_f_Early_Vir	Ct_h_Late_Vir	Ct_h_Late_Vir	Ct_h_Late_Vir	Cs_a_Early_Exp	Cs_a_Early_Exp	Cs_a_Early_Exp	Cs_a_Early_Exp	Cs_a_Early_Exp	Cs_a_Early_Exp	Cs_b_Mid_Exp	Cs_b_Mid_Exp	Cs_b_Mid_Exp	Cs_f_Early_Vir	Cs_f_Early_Vir	Cs_f_Early_Vir	Cs_h_Late_Vir	Cs_h_Late_Vir	Cs_h_Late_Vir
FFA 14:0_mz_227.2011_RT_8.6	22444.4	37926.7	205447	5942.18	4730.46	3775.04	0	0	0	0	0	0	2.74451e+07	1.02821e+07	1.30062e+07	5.41149e+06	4.76302e+06	5.48299e+06	8162.9	0	1.16331e+06	3.2198e+07	4.39725e+07	3.55952e+07	7.46049e+06	6.08578e+06	4.8829e+06	0	39133.8	2.4653e+07	2.9398e+07	4.69488e+06	3.44258e+07	0	0	1.47841e+07	133695	0	0	1.70066e+07	1.89266e+08	2.71115e+07	493160	5.47881e+07	4.50462e+07	1.25743e+07	1.23919e+07	1.64818e+06
FFA 14:2 +1O_mz_239.165_RT_2.56	0	0	0	17785.6	12695.9	13064.7	101698	216191	112232	74696.8	137672	73460	368971	71818.2	155601	87464.8	99163	123692	413205	430580	434655	745673	792173	490579	863287	926955	694193	177389	463983	729264	2.05208e+06	1.17818e+06	4.93265e+06	97446.6	67910.6	71862.9	86570.7	104892	177702	55127.9	87107.9	147425	252856	282487	148331	3.56839e+06	2.38334e+06	3.19219e+06
FFA 14:2 +1O_mz_239.165_RT_2.25	0	0	0	17988	12573.9	11883.2	63944.1	85532.5	40159.3	45545.2	71119.4	36047.8	118706	75747.6	105224	68571.2	67033.8	133153	169348	206733	207314	220600	222154	345930	470293	481507	353427	28662.7	79748	312921	301695	473079	1.78709e+06	28491.4	33612.9	27884.2	38806.8	50700.2	81216.8	77780.1	33220.3	57975.3	81931.9	60846.8	59454.4	534794	290161	494282
FFA 14:2 +1O_mz_239.165_RT_1.71	0	0	0	193.377	97.056	0	20397.7	26734.6	21620.1	13545.3	28806.4	15168.7	152492	288714	63345	27079	23230.5	31335.4	70722.8	77212.1	76575.5	267952	293505	269800	242199	292975	236854	82967.7	124315	287798	565641	171198	1.01805e+06	41463.2	43867.9	42665.4	78340.7	78007.4	46313	140131	171730	125024	74283.1	134484	155986	471900	293769	189930
FFA 14:2 +2O_mz_255.1601_RT_1.93	106119	64183	299711	61446	27194.2	25145.7	261358	391556	361688	221148	355985	160108	518335	63603.9	0	96279.5	101615	89077.6	302153	440032	453922	1.35359e+06	566001	557116	560722	543124	521327	479019	1.2998e+06	1.98925e+06	2.08743e+06	1.08024e+06	4.3934e+06	221390	243263	246145	437940	456677	475052	118841	223904	140101	417174	0	479289	1.13624e+06	0	1.09084e+06
FFA 14:2 +2O_mz_255.1601_RT_3.02	29117.1	25125.3	111906	5420.68	2366.07	2660.55	10247.6	15967.2	13222.2	15892.7	14149.9	12625.1	142894	82182.4	84381.6	22460.9	34706	36540.8	12956.6	27205.9	25605.7	146250	164930	113462	78038.9	98668.9	70511.2	16165.7	53898.5	175802	167698	78508.3	387077	12964.5	10130.5	0	23123	21048.7	24677.3	106665	115013	98190.7	9186.46	0	88512	238644	166384	189455
FFA 14:2 +2O_mz_255.1601_RT_2.67	28660.2	17831.2	108880	72604.7	39380.8	30212.3	31912.4	0	0	51550.8	74462.9	52250.6	314914	103221	211238	13850.7	13106	35613.5	48492.8	0	69419.5	258937	558794	232574	43306.3	49019.5	38591.2	46773.2	162651	279557	335332	260270	959212	32995.7	34014.4	0	64695.9	49767.5	79849.9	288928	164296	195323	46520.2	90656.2	55904.3	157518	89781	77738.7
FFA 16:0_mz_255.2327_RT_9.85	3.59487e+06	3.32763e+06	1.80775e+07	694635	290689	313187	339312	22208.1	0	98309.1	0	0	8.38237e+06	1.90247e+06	6.53919e+06	1.95563e+06	4.17373e+06	4.42828e+06	0	120635	0	1.65138e+07	2.13392e+07	2.52545e+07	3.95882e+06	3.52238e+06	2.20853e+06	220344	2.26457e+06	1.24925e+07	2.07812e+07	2.45529e+06	2.4789e+07	0	0	1.94268e+06	2.53522e+06	503822	0	5.35974e+06	2.56965e+07	6.39845e+06	1.39334e+06	1.42856e+07	7.49807e+06	965421	4.53872e+06	0
FFA 16:1_mz_253.217_RT_8.88	95900	93200	439000	20700	14600	15400	0	0	0	0	0	0	3.74647e+07	2.20584e+07	2.07965e+07	9.49286e+06	8.83169e+06	6.81995e+06	0	0	2.47099e+06	5.35818e+07	8.13908e+07	9.51359e+07	2.3612e+07	1.79303e+07	1.43436e+07	0	0	1.23062e+08	8.34682e+07	1.71916e+07	1.30218e+08	0	0	2.41162e+07	0	0	0	4.08309e+07	1.62098e+08	5.30396e+07	580478	7.89248e+07	8.29649e+07	8.9185e+07	1.91911e+07	3.97333e+06
FFA 16:1 +1O_mz_269.2123_RT_4.37	702000	403000	2180000	379000	185000	175000	68100	0	3410	4330	21500	0	79600	0	2610	0	3860	0	24700	36700	46700	286000	386000	288000	2040000	2970000	2970000	8920	103000	415000	239000	61500	600000	0	23800	97700	14600	39700	37200	202000	156000	143000	48500	236000	200000	6190000	276000	296000
FFA 16:1 +1O_mz_269.2123_RT_5.77	514224	463771	2.58055e+06	115659	47650.7	52342.8	27516.2	13697.1	8781.47	0	16670.3	0	124008	0	2405.07	0	0	0	0	25783.6	70621	405063	511645	287932	307800	421543	381390	25184.7	199799	667246	360493	73006.2	993911	0	54363	331163	0	0	357.686	355435	511466	293238	24787.5	405110	347016	3.54192e+06	7334.48	0
FFA 16:1 +1O_mz_269.2123_RT_6.24	321783	277385	1.56862e+06	58986	23599.6	29605.4	18927.9	12443.1	22378.4	0	5408.49	0	70032.6	0	6274.54	0	0	0	0	19421.3	34461.7	242184	286648	191899	0	475329	448148	7550.46	29006.6	349323	198395	56963.8	647099	0	83558.6	145621	4043.14	0	5300.72	149998	0	103242	0	85795	72785	2.52659e+06	3315.45	0
FFA 16:2_mz_251.2014_RT_8.25	449668	1.24075e+06	6.37762e+06	759900	958257	671169	2694.63	291.604	0	97.0229	1890.67	0	1.67723e+07	9.17336e+06	9.85861e+06	3.40306e+06	3.72916e+06	8.2564e+06	44922.9	72825	2.79702e+06	2.62158e+07	3.31669e+07	4.09519e+07	1.09496e+07	1.05963e+07	1.03479e+07	531.844	191729	7.87214e+07	4.78841e+07	1.06156e+07	8.66717e+07	3557.79	2001.47	3.83808e+07	24255.1	1898.97	5947.21	3.12714e+07	2.01164e+08	5.4542e+07	3.30478e+06	1.27887e+08	1.08666e+08	146255573	1.74898e+07	4.01257e+06
FFA 16:2 +1O_mz_267.1966_RT_2.2	31022.9	32885.7	192021	42314.6	30468.8	26442	24600.5	19386.8	479450	14824.6	31146.6	10966.9	76793.9	112362	37040.6	18336.2	24617.8	29717.2	33573	44025	49251.6	165512	170867	180166	148835	236769	304989	38233.2	71745	168534	3.962e+06	108182	639450	51100.3	15126.5	72409.8	82216.3	80640.6	0	196944	419966	285960	96258.9	336870	446672	1.56198e+06	35399.5	542759
FFA 16:2 +1O_mz_267.1966_RT_3.46	42057.8	30635.7	158141	3.14205e+06	3.89962e+06	2.15061e+06	32273	38439.8	36912.1	39246.8	49766.8	30310.7	87559.8	40108.4	47550.2	33681.3	97055.5	48977.6	87743.3	140695	150701	676705	835512	574420	3.42064e+06	4.18203e+06	4.26594e+06	42221.3	182316	472408	327922	162110	786226	38976.9	38827.5	125815	77013.6	88964.9	77105.5	216377	301015	152085	153385	438885	436283	2.66748e+06	632463	761652
FFA 16:2 +1O_mz_267.1966_RT_4.28	28686.1	23717.2	105280	212255	151907	148332	0	0	0	0	0	0	24922.4	0	0	0	0	0	0	0	0	323328	389667	297795	1.46591e+06	1.81983e+06	1.81922e+06	0	18424.4	135029	196409	56999.1	0	0	0	29283.4	0	0	47057.2	0	212326	0	6856.23	0	229395	570735	166295	99483.4
FFA 16:2 +1O_mz_267.1966_RT_4.78	35539.1	26706.7	162857	42300.9	29000.9	31209.9	0	0	0	0	0	0	71296.9	49743	0	0	0	0	0	0	0	152887	216551	158733	728339	680803	903548	0	24355.8	149381	174814	32752.3	490275	0	0	45635.1	0	0	0	117423	579245	227767	1005.99	0	445862	2.23836e+06	112978	35818.5
FFA 16:2 +2O_mz_283.1916_RT_2.37	165440	116424	729926	242652	157196	149621	227987	225339	222636	154401	275740	121844	376231	65504.8	274370	176837	212698	244731	540979	519535	606169	1.36885e+06	2.22662e+06	1.39533e+06	3.33774e+06	3.74553e+06	3.20278e+06	310409	869698	1.86613e+06	2.53439e+06	1.10349e+06	2.48133e+06	179138	216657	277365	605675	368019	292737	596462	285089	433271	437480	303782	278213	3.54723e+06	605151	1.84381e+06
FFA 16:3_mz_249.1857_RT_7.36	0	0	0	0	245.813	314.364	12539.3	12000.9	13681	10342	35798.8	20089.8	2.07533e+07	1.42097e+07	7.95382e+06	2.92205e+06	3.2814e+06	5.84145e+06	143133	215785	509370	3.14124e+07	4.13438e+07	3.93901e+07	2.02434e+07	2.91294e+07	2.95003e+07	162537	417643	1.59038e+08	6.93633e+07	1.88342e+07	147589460	35674.3	30375	2.74321e+07	43949.8	60145.1	40759	1.56995e+07	7.12961e+07	2.66841e+07	4.18933e+06	1.03672e+08	8.67162e+07	8.34028e+07	6.27571e+06	2.04367e+06
FFA 16:3 +1O_mz_265.1809_RT_2.99	73202.9	46485.4	289249	8.66986e+06	5.78626e+06	6.08151e+06	53856.5	73617.4	16288.6	55219.1	84475.1	48951.9	201534	181993	123192	58562.5	304971	79280.8	3.81982e+06	4.7441e+06	4.13245e+06	5.24579e+06	6.55261e+06	4.14771e+06	2.26431e+07	2.7582e+07	1.97146e+07	134366	165575	1.84726e+06	1.90938e+06	902541	4.55458e+06	52761.5	41162.4	122899	73065.5	79391.6	173499	478514	1.74642e+06	923109	298484	2.67263e+06	559312	1.16753e+07	1.85259e+06	2.58288e+06
FFA 16:3 +2O_mz_281.1759_RT_2.23	34565.2	28771.4	111555	975786	593255	716315	86217.3	118863	14903.5	88722.3	130943	46490.5	333424	155140	253196	174279	213600	293807	1.57182e+06	1.73122e+06	2.07815e+06	3.43958e+06	3.76126e+06	2.37961e+06	4.72085e+06	5.4395e+06	4.65674e+06	314681	570008	1.90424e+06	3.99681e+06	1.6074e+06	5.38179e+06	125883	124930	167814	237487	246113	259642	446787	122910	308274	339703	341345	434687	3.00715e+06	1.22596e+06	962707
FFA 16:3 +2O_mz_281.1759_RT_3.21	8936.6	9307.42	49520.6	14244.8	8160.32	9174.11	14956.1	39601.5	23435.5	45899.4	24719.2	32259.8	339525	242558	119978	29661.2	22145.3	51037.6	86767.1	96920.7	101967	908063	1.20975e+06	992001	1.85289e+06	2.16251e+06	1.41016e+06	55502.9	163079	4.03053e+06	895487	465070	3.31419e+06	17462.9	20208.5	125161	74113.6	61334.8	41661.6	130587	311226	149493	70859.8	529918	379757	1.09419e+06	122271	114229
FFA 16:3 +3O_mz_297.1707_RT_1.52	176409	203597	1.55861e+06	1.92125e+06	959282	1.21781e+06	150476	153352	115633	128781	176275	89715.8	313801	128254	208897	209090	168575	244349	1.25362e+06	1.55247e+06	1.39383e+06	3.26772e+06	3.19487e+06	2.37761e+06	2.67786e+06	2.94472e+06	2.34415e+06	499520	858085	1.9604e+06	4.13074e+06	1.42788e+06	7.3653e+06	282922	238463	430932	669171	517820	475793	1.22198e+06	1.01013e+06	1.03818e+06	1.0344e+06	1.48408e+06	1.16207e+06	6.45118e+06	4.89189e+06	3.92677e+06
FFA 16:3 +3O_mz_297.1708_RT_2.13	3696.22	2006.49	5145.59	8887.45	5758.95	5035.57	66146.7	83277.8	79687.9	73072.9	68378	69430	878188	1.67297e+06	328790	58020.3	44911.7	104986	165957	190525	232487	1.22499e+06	1.4171e+06	1.2798e+06	831037	385481	393255	134751	402772	730766	2.83412e+06	436457	3.44582e+06	75222.6	63834.8	157793	206149	187816	147619	660923	1.22185e+06	817587	195170	776931	796717	3.09436e+06	2.38136e+06	1.5777e+06
FFA 16:3 +3O_mz_297.1708_RT_3.8	3662.44	905.07	11024.7	809.543	112.285	161.432	147.115	2605.07	440.369	1770.48	1625.75	1328.55	278290	196895	76638.2	51415.8	15509.6	1.09042e+06	4095.5	8311.47	11408.3	196395	216125	177404	193168	119413	87901.8	4110.93	5310.04	141609	282216	44395.6	340988	1895.92	702.258	78810.2	4884.85	1195.69	1853.99	80294.2	278057	153055	1069.16	184751	148718	0	114110	57899.7
FFA 16:4_mz_247.1702_RT_3.01	0	0	0	5923.69	5147.01	5173.62	6450.38	4073.62	5037.26	2043.43	17897.9	1276.57	3.22029e+06	2.13514e+06	888175	437893	537088	770247	315897	355490	296408	1.80801e+06	1.97839e+06	1.40801e+06	1.83289e+06	2.38264e+06	2.04243e+06	11870	237680	468973	579426	178039	840098	14084.2	11634.8	420443	53937.3	23449.7	12836.7	2.11979e+06	372033	1.15979e+06	52895.9	253917	143374	2.2092e+06	573352	283310
FFA 16:4_mz_247.1701_RT_6.05	16652.1	34644	195423	26128.7	23339.3	15877.3	33319.5	26635.6	17867.1	11343.6	44173.1	24482.8	1.09393e+07	9.70403e+06	5.33747e+06	1.49775e+06	2.07547e+06	3.33256e+06	567432	553973	727929	1.50212e+07	2.0771e+07	1.79492e+07	1.83373e+07	3.37132e+07	3.25822e+07	231729	603565	1.21535e+08	4.33269e+07	1.49804e+07	1.18548e+08	132493	143388	157892570	249693	257978	218436	1.04889e+08	4.18805e+08	1.13224e+06	2.7847e+07	3.94862e+08	3.47547e+08	4.05626e+08	3.50647e+07	1.28624e+07
FFA 16:4 +1O_mz_263.1652_RT_2.46	28341.5	41540.3	343883	6.03265e+06	5.78117e+06	5.04597e+06	84428.9	75157	116407	121076	13983.2	89556.6	484053	378727	340018	139150	363972	1.07722e+06	6.99029e+06	8.23031e+06	7.58621e+06	9.90069e+06	1.19449e+07	8.1605e+06	3.09138e+07	3.28769e+07	2.93637e+07	280088	471361	3.20192e+06	6.47215e+06	3.53563e+06	1.50391e+07	269604	303237	952398	408801	492113	482273	2.44246e+06	1.9821e+06	1.28618e+06	3.86298e+06	6.2982e+06	5.27216e+06	1.49464e+08	2.21104e+07	3.04842e+07
FFA 16:4 +1O_mz_263.1653_RT_3.03	21592	10467.1	59074.7	102289	71536.3	77011.6	24812.9	31077.5	43020.7	5676.45	14538.6	3670.75	652232	513247	197904	10869.6	15824.1	43893	303308	391887	349505	2.74512e+06	4.04495e+06	3.28784e+06	4.94023e+06	5.74691e+06	5.28709e+06	69180.1	169354	7.62578e+06	2.39986e+06	1.19538e+06	8.94224e+06	83125	29706.5	960675	103088	102048	109243	1.31895e+06	2.73627e+06	1.15319e+06	657703	3.61328e+06	2.88341e+06	1.70551e+07	1.94359e+06	1.4647e+06
FFA 16:4 +2O_mz_279.1602_RT_1.85	62099.7	67682.8	333153	2.03272e+06	1.73524e+06	1.34045e+06	77099.4	104853	85877.2	86019.7	124217	62544.1	436583	318824	322949	241587	276378	324480	1.69206e+06	1.53938e+06	1.76381e+06	3.57189e+06	3.70859e+06	2.39379e+06	5.79841e+06	6.55225e+06	5.69454e+06	346769	703624	3.18309e+06	6.7995e+06	2.9329e+06	1.06664e+07	231250	240263	671441	498146	571446	497764	2.04338e+06	2.4013e+06	2.01573e+06	1.97688e+06	3.77853e+06	2.9984e+06	9.82366e+06	7.00066e+06	7.10437e+06
FFA 16:4 +2O_mz_279.1602_RT_2.63	13941.7	7195.57	50383.9	11465.6	8660.14	9051.7	23361.5	28975.4	39479.2	25230.6	29803.9	23717.4	478910	324541	218491	32425.3	36733.5	65697.5	143782	149582	129684	1.31924e+06	1.7254e+06	1.19307e+06	2.1468e+06	2.46641e+06	2.42189e+06	65645	123527	7.44597e+06	1.70046e+06	800335	7.4063e+06	56744.2	37241.2	1.20367e+06	78390.1	72273.2	83526.2	693420	1.76416e+06	1.16457e+06	216667	3.02686e+06	2.03595e+06	8.97717e+06	0	1.43454e+06
FFA 16:4 +3O_mz_295.1549_RT_1.32	67745.2	83160.3	523462	469972	317805	292088	66689.4	178410	27995.7	52949.3	81988.1	36953.2	120608	0	144756	72631	112448	128459	146012	240821	258387	1.29554e+06	753039	482582	727127	800090	368759	131625	446085	831852	1.56952e+06	274290	2.85687e+06	200179	94470.4	932231	391887	159364	309137	1.15062e+06	1.99028e+06	1.18733e+06	386122	2.71469e+06	1.4134e+06	620688	2.35426e+06	3.18584e+06
FFA 16:4 +3O_mz_295.1551_RT_2.33	10088.2	2924.91	26338.1	1798.69	328.152	741.186	473089	523188	548619	485966	842013	528480	2.46977e+06	915469	1.79724e+06	9081.81	5824.95	16130.9	461842	430245	632780	2.19216e+06	2.6813e+06	1.55406e+06	82543.8	83698.3	371336	551679	1.02506e+06	1.55323e+06	3.39067e+06	2.79806e+06	8.08289e+06	442667	530660	583598	499857	484099	506217	2.34768e+06	1.25149e+06	2.11789e+06	370992	486048	400009	519051	277030	221885
FFA 16:4 +4O_mz_311.1502_RT_1.28	91821.9	118560	612460	302312	20352.9	197100	84524.5	138936	60373.4	75859.1	246446	38934.3	436649	0	95572	98445.2	56746.5	555172	136410	133719	160800	530016	420066	269656	366365	418729	294806	165505	350723	715787	741087	286366	1.23172e+06	113408	120439	159012	507203	232580	178678	381840	350392	239703	391724	406182	345899	1.3862e+06	1.352e+06	1.17249e+06
FFA 18:0_mz_283.2642_RT_11.25	3.83019e+06	3.50264e+06	1.92532e+07	785000	315797	392109	1.92317e+06	408624	1.01124e+06	226287	0	0	5.69314e+06	0	4.08398e+06	2.33659e+06	5.23008e+06	8.37388e+06	0	0	0	9.24646e+06	1.08597e+07	8.21864e+06	578289	1.30112e+06	381178	1.05097e+06	4.28947e+06	7.63897e+06	1.11382e+07	1.31426e+06	1.31318e+07	0	1.02472e+06	1.3134e+06	6.01768e+06	1.48892e+06	0	3.05392e+06	5.47152e+06	3.64698e+06	2.97657e+06	2.25606e+06	63642.4	2.02241e+06	4.48245e+06	0
FFA 18:1_mz_281.2487_RT_10.14	289342	294428	1.66316e+06	66739.9	29565.5	34041.7	0	0	0	0	0	0	1.4935e+06	446509	619882	3283.47	211615	790456	0	0	0	3.5233e+06	4.55147e+06	4.8928e+06	1.18803e+06	802390	581791	0	130757	3.64603e+06	4.28844e+06	820758	7.60246e+06	0	0	1.23294e+06	101569	163829	0	1.91352e+06	6.67622e+06	2.16589e+06	164974	4.57862e+06	3.75323e+06	7.50182e+06	2.16547e+06	347935
FFA 18:1 +1O_mz_297.2436_RT_6.66	261771	238846	1.31593e+06	55888.8	21115.9	23337.9	167378	0	0	0	0	0	11504.6	0	0	0	0	0	0	0	0	80469.5	102593	52162.8	2914.66	20019.5	28099.6	0	569.007	232110	110438	0	408176	71281.6	0	85170.8	0	0	0	121766	0	23953.1	0	4381.18	0	5.24429e+06	317667	149582
FFA 18:1 +1O_mz_297.2436_RT_7.73	198889	202789	1.09709e+06	38412	15095.7	17526.5	600952	482257	512331	306850	513308	342943	495129	287526	358429	221250	157400	153900	314144	626219	599174	686749	934794	696185	446444	460008	437292	453364	714498	1.56098e+06	51421.3	43157.1	61773.1	0	661541	1.91111e+06	406001	486102	406137	732643	303289	501519	398312	393780	412570	2.1518e+06	6603.22	291823
FFA 18:2_mz_279.2329_RT_9.31	24342.6	23082.6	112465	5391.26	1883.51	2573.74	217190	303868	119668	0	0	0	1.12947e+06	98957.6	985340	318033	342503	916301	0	0	17848.2	3.99587e+06	3.57056e+06	5.20577e+06	2.20594e+06	2.57093e+06	2.04216e+06	0	73076.8	5.41901e+06	6.29984e+06	1.51497e+06	9.65205e+06	75422.5	88352.8	1.16913e+06	0	0	0	2.60237e+06	6.27863e+06	3.06613e+06	0	2.26139e+06	2.66364e+06	9.22259e+06	1.49158e+06	564977
FFA 18:2 +1O_mz_295.2279_RT_5.93	32132.4	26014.8	150161	10577	4793.88	5590.63	144570	47136.1	37118.8	0	0	0	168646	72143.5	118446	21123.3	0	0	9405.66	0	4607.63	1.69202e+06	2.22515e+06	1.79256e+06	6.28102e+06	1.06335e+07	0	0	22925.4	1.54508e+06	894907	407834	2.87491e+06	113924	26997.2	170638	56221.8	184084	8733.92	148365	195619	151179	21146.9	440044	346070	1.95808e+07	578443	338647
FFA 18:2 +1O_mz_295.2279_RT_6.92	30498	29111.1	115468	6650.87	1916	2149.61	0	0	0	0	0	0	0	0	0	0	0	0	0	0	0	0	0	0	0	0	2447	0	0	0	0	0	61401.5	0	0	0	0	0	0	0	0	0	0	0	0	1.10947e+06	0	0
FFA 18:2 +2O_mz_311.223_RT_3.41	35034.1	15086	70258.9	117287	16837.7	26590.2	187077	69663.3	71293.8	12409.2	57331.2	15504.4	197093	169496	60156.1	0	10267	11625.8	176894	262866	295690	1.42164e+06	1.11655e+06	996524	1.59013e+06	1.53392e+06	1.59041e+06	89751.9	167491	1.64001e+06	815406	363349	2.09236e+06	134129	135505	216562	112348	203418	89285.2	251695	145374	186713	103119	233052	200162	174706	116348	176025
FFA 18:2 +2O_mz_311.223_RT_6.34	24499.7	20894.5	110767	7346.01	4390.87	3089.91	34359.7	31880.7	23006.5	3830.47	20892.8	3362.11	141367	46442.8	54521.7	19977.4	13253.6	27888.3	11753.3	40643.9	33113.1	917538	1.01029e+06	700628	848686	511496	310221	10780.1	51195.5	1.9519e+06	1.16519e+06	489229	3.80362e+06	26675.6	26548.1	64634.5	37886.3	42766.3	36360.8	133120	116488	138155	22758	23600.6	95465.2	129261	52122.9	20587.3
FFA 18:2 +2O_mz_311.2229_RT_8.16	47557.9	46790	198341	3901.45	3046.09	4164.37	8354.69	2572.82	5454.77	1263.6	1452.64	0	49167.3	38355	30542.4	8080.31	9665.73	10853.3	5375.08	7536.97	19727.3	97949.9	113457	123420	54799.9	57920.9	48941.4	7071.3	17353.3	436027	167210	50380.3	550181	0	3260.24	205004	6437.24	3886.82	989.659	177950	508269	296321	18443.2	647193	452812	704896	38207.3	12053.1
FFA 18:3_mz_277.2173_RT_5.93	2885.45	3310.2	9910.67	0	272.805	295.907	7005.11	4167.95	1297.74	0	346.903	0	10265.2	3835.51	5042.36	882.986	0	327.2	222.193	283.07	0	42295.7	58596.1	38503.4	141611	251848	262432	372.399	1619.24	17999.3	22011.5	12249.2	67196.1	7399.05	544.719	1577.04	1575.58	2100.29	0	4321.02	0	0	112.955	863.334	1266.1	405175	10080	7198.62
FFA 18:3_mz_277.2173_RT_8.73	19800	55100	268000	2640	4610	3130	27156.5	58496.1	14022.4	0	0	0	1.5034e+06	1.17762e+06	1.00811e+06	329969	336213	600964	0	0	328326	288282	1.68177e+06	2.6741e+06	882550	815883	410274	0	12318.6	3.84868e+06	2.35465e+06	633241	4.3409e+06	0	890.93	3.82428e+06	0	0	0	3.91094e+06	1.17245e+07	4.99804e+06	140514	1.01e+07	1.0349e+07	1.02665e+07	1.76112e+06	545997
FFA 18:3 +1O_mz_293.212_RT_4.53	6147.99	5997.56	22627.6	92340.1	76851.7	74784.6	34884.3	27228.6	20115.2	6594.43	11406.9	0	73280.9	33452.8	40307.5	215.79	728.874	0	5697.37	12258.2	11071.6	424180	629234	486956	1.74655e+06	2.60458e+06	2.6841e+06	5062.3	41176.9	381472	18042.1	139318	659523	23100.1	7505.07	66266.3	11287.1	30900.5	15493	76216.1	110542	73190.5	17849.1	129916	137654	1.13032e+07	495365	177852
FFA 18:3 +1O_mz_293.2124_RT_5.64	7139.18	943.391	21298.3	2443.99	1672.9	984.282	27993.7	23827.2	31476	0	0	0	167959	82166.9	44151.7	0	0	0	0	0	0	651270	754848	818608	670316	798088	778626	0	19003.9	1.30409e+06	731869	329954	2.60589e+06	32587.8	15898.2	139650	8169.11	17143.2	647.3	136515	313293	200749	0	254738	242486	5.13155e+06	112262	61364.1
FFA 18:3 +1O_mz_293.2124_RT_6.3	48366.9	111511	488483	0	92.7719	121.506	5914.61	9041.04	10253.7	5784.36	636.213	12945.5	546131	194377	204532	86778.5	65621.6	134609	4047.04	5708.12	8080.07	3.41173e+06	3.70978e+06	2.69243e+06	3.15694e+06	1.96818e+06	1.17506e+06	7802.09	33331.7	7.06815e+06	4.30348e+06	1.90045e+06	1.36152e+07	5549.38	0	238844	6621.94	1747.19	4158.3	455328	489765	468842	2641.27	459185	414687	649218	215598	93129.4
FFA 18:3 +1O_mz_293.2124_RT_8.21	0	2404.08	16656.4	328.667	134.787	130.565	0	1628.21	798.677	312.751	1679.83	1929.82	458238	0	473474	244312	651955	1.03702e+06	2679.33	3409.94	12591.8	550482	342736	20909.3	142104	151067	96473.5	1670.95	8321.57	2.19033e+06	21439.4	402843	352099	1609.86	1074.1	82626.4	2357.44	810.985	1460.79	43506	0	0	25863	0	0	3618.81	0	3750.54
FFA 18:3 +2O_mz_309.2073_RT_1.98	107749	267836	1.83484e+06	1.22909e+06	1.12129e+06	711526	156970	107004	68636.7	82019.1	126579	42698.4	536187	927632	198783	206357	203126	221465	364951	418523	417985	545573	943812	663115	1.80406e+06	2.15973e+06	360186	284884	479119	1.40578e+06	1.30924e+06	665025	2.38398e+06	123825	64370.2	172906	141659	246902	131617	245539	285723	302069	529277	871718	643730	852718	630166	709116
FFA 18:3 +2O_mz_309.2073_RT_2.98	9924.98	11566.4	115521	284658	177111	165010	73522.9	61609.7	63239.2	19748.6	51335.4	9963.45	4.15369e+06	3.51439e+06	1.12293e+06	716340	846709	1.06619e+06	237251	181068	318093	2.95921e+06	2.87233e+06	3.26142e+06	7.87804e+06	9.24628e+06	6.89255e+06	99808.2	263286	2.66803e+06	3.17687e+06	1.15698e+06	3.54127e+06	69979.1	28933.9	1.00425e+06	64086.1	79255.7	70101	1.27789e+06	2.80781e+06	2.07128e+06	126247	2.80417e+06	2.3826e+06	1.09254e+06	335056	415897
FFA 18:3 +2O_mz_309.2073_RT_3.89	2849.36	0	26455.3	97018.5	67418.1	74264.7	171472	119197	125687	88320.2	202337	12431	1.6254e+06	829088	606866	132216	144536	294541	740484	302438	940932	2.12159e+06	2.18795e+06	1.10224e+06	2.95722e+06	2.41491e+06	2.65734e+06	876578	514492	3.18977e+06	2.20897e+06	1.7002e+06	3.42284e+06	256699	214170	328705	272152	438573	366912	450683	615458	375042	941837	483100	319398	493371	145112	592982
FFA 18:3 +2O_mz_309.2074_RT_5.01	1781.92	928.323	0	1969.26	1795.26	1258.77	6109.25	12207.5	10655.3	4399.35	7234.48	4356.28	124214	93355.1	48365.8	21411	26003.1	33542.5	20918.2	21694.2	26037.4	168903	213221	235773	1.53136e+06	557556	371585	15498.7	24246.5	153526	235029	115840	1.31195e+06	6573.76	5536.82	48806.4	10261.2	7548.34	10971	59787.9	129837	118419	11888.2	90456.4	84014.3	55710.9	24891.8	26474.2
FFA 18:3 +2O_mz_309.2073_RT_7.32	31265.5	81947	416723	19919.4	17219.6	13414	701.795	531.877	972.561	84.501	845.072	712.275	32172.9	39253.7	13929.5	2131.47	3253.98	1876.33	2075.08	1100.17	3430.24	46675.1	56583	52745.8	85587.4	93818.3	92278.4	1189.71	2646.75	457978	94536.1	47758	501314	1049.64	458.783	90568.3	653.119	1879.94	1832.87	49916.9	106882	67937.6	12380.3	300583	206465	227576	7407.26	6799.84
FFA 18:3 +2O_mz_309.2074_RT_10.99	0	0	0	0	367.68	422.393	0	0	0	0	54.8025	0	27037.5	29786.3	6773.29	2033.24	688.862	1667.44	0	0	198.187	62628.3	90190.7	105594	62990.2	31282.5	25529.9	0	199.855	151837	115907	38717.8	391187	0	0	3242.63	179.092	0	0	2026.37	464.548	2250.52	255.296	3798.24	2544.99	1474.2	2080.97	2755.13
FFA 18:3 +3O_mz_325.2017_RT_1.79	5316.25	2412.93	26599.4	208016	179581	134594	195287	151509	147548	82151.5	176063	83658.4	0	250149	151901	113347	94061.7	113161	236161	298404	286792	2125.15	0	637070	592893	604469	504360	180702	366046	786839	1.07179e+06	312104	1.97438e+06	118294	105708	199183	506319	265429	203052	390599	665028	468948	260176	658616	665623	4.81731e+06	1.36901e+06	922185
FFA 18:3 +3O_mz_325.2017_RT_2.02	9655.1	3528.29	19474.5	75461.8	53537.4	47268.3	529305	131903	111495	87338.1	144770	76730.4	489427	259976	276460	187609	199184	336731	142459	203957	181662	584690	1.14417e+06	475917	388573	452825	392520	135889	829071	747192	884861	284128	1.57671e+06	163054	42041.2	74964.9	129152	158654	109435	252167	267349	190234	88767.8	278387	239497	1.6276e+06	398848	361778
FFA 18:3 +3O_mz_325.2021_RT_3.19	4837.28	1975.71	25213	4668.69	1750.08	2604.35	24236.8	27882.5	34194.4	25708.9	28762	18049.6	427531	779274	133471	18978.3	17922.2	33687	38203.6	46500.5	58195.5	511874	755514	757851	140107	124472	144290	28954	81156.2	252179	1.13274e+06	155130	1.53885e+06	21927.7	20023.3	200986	44163.6	30703.7	34388.5	610994	2.52698e+06	1.42106e+06	55721.2	1.93078e+06	2.02684e+06	9.68155e+06	3.96265e+06	2.20793e+06
FFA 18:3 +3O_mz_325.2022_RT_3.91	1681.08	1472.03	6215.2	3345.52	2470.86	1889.53	6260.65	15017.6	8968.76	4929.35	5870.68	4414.54	283363	216082	76291.9	21861.8	14384.4	28708	6847.84	11337	13159.9	229277	300545	222294	123125	8866.42	57223.6	7071.69	22970.2	143312	0	61302.8	297417	8130.7	4763.44	87911.6	7624.99	6863.68	10209.8	157813	497793	327676	12616.6	409789	443628	1.32742e+06	496587	266625
FFA 18:3 +3O_mz_325.2021_RT_5.07	851.614	3797.19	0	891.695	91.0049	0	1821.91	6242.64	353.616	0	3395.92	0	42954.5	23889.1	10880.3	575.4	0	4844.73	0	386.948	2621.49	39703.3	42813.1	54845.2	28301.7	15465	11378.4	1039.8	13671.8	28352.6	60671.1	5820.06	121320	0	0	17159	3790.97	0	3292.98	31034.2	114207	64685.4	0	113131	60723	102428	146612	56682.7
FFA 18:4_mz_275.2016_RT_7.96	0	1128.04	20374	0	94.9374	193.641	9940.04	2774.79	0	0	7221.52	2378.5	6.06549e+06	5.74742e+06	4.42779e+06	1.96136e+06	2.33182e+06	4.77538e+06	27086.4	46506.6	694022	5.00744e+06	4.78798e+06	5.7924e+06	3.68028e+06	3.42864e+06	2.84249e+06	4228.22	39960.5	1.23595e+07	6.99028e+06	2.28066e+06	1.5736e+07	11239	0	1.22103e+07	7538.57	6771.25	6714.75	6.5465e+06	1.82063e+07	8.75142e+06	1.13608e+06	2.55136e+07	2.52776e+07	2.61046e+07	3.34638e+06	1.18687e+06
FFA 18:4 +1O_mz_291.1967_RT_2.02	26847.2	39295	292245	181833	163215	102496	43017.5	34597.8	32614	25097.3	42378.4	29418.2	242163	206236	90970.9	91091.1	97375.7	103326	116242	142427	136110	468220	486603	325333	685273	787619	594609	104946	158588	422907	626677	240670	918850	40616.3	24369.1	60088.2	58873.3	55631.1	36755.9	139572	129844	136804	192563	253967	286666	236959	210017	259579
FFA 18:4 +1O_mz_291.1968_RT_2.94	23639.1	24229.2	136710	541576	420217	422285	47536.8	23768.5	19126.6	13387.4	23639	4079.3	1.88912e+06	1.72225e+06	525023	453102	435539	771902	111322	60423.1	124359	1.44766e+06	1.38372e+06	1.05921e+06	6.32138e+06	4.88384e+06	6.03466e+06	57926.1	101024	1.37252e+06	1.50503e+06	307678	2.35757e+06	47953.4	27992	416543	34268.6	38233.9	29300	573735	1.71541e+06	937189	163893	1.41454e+06	1.16904e+06	2.25172e+06	264320	304684
FFA 18:4 +1O_mz_291.1967_RT_3.83	14882.7	10000.9	82682.4	133968	99000.1	96267.6	25133.4	27290.3	22645.4	11438.5	18597	9783.92	541770	391283	209018	80621.3	71660.7	133805	59840.2	49889.5	63494.5	1.86359e+06	1.56836e+06	1.04e+06	5.20016e+06	1.02285e+07	6.10376e+06	48205.6	79254.6	1.51034e+06	115296	338995	2.26984e+06	35285	18897.2	5414.33	36215.9	37607.6	44617.2	932995	993.015	912447	292356	1.77907e+06	1.41776e+06	4.31652e+07	1.16691e+06	1.27579e+06
FFA 18:4 +1O_mz_291.1968_RT_4.22	7533.89	6737.07	15515.5	49747.7	35322.9	31617.9	14876.5	17324.4	13085.6	8216.46	8705.95	6166.76	208484	159712	82360.9	27413	27358.8	49798.6	21858.1	19791.7	27961.5	550935	773712	675689	1.86924e+06	2.45573e+06	2.55399e+06	21839	38231.8	539864	302623	122546	853194	22969.8	13499.3	178842	17673.6	18725.2	19004.7	254770	887023	303102	125207	753791	687657	6.2781e+06	405824	335259
FFA 18:4 +2O_mz_307.1916_RT_1.3	40932.2	61965.9	305607	55019.6	38618.8	37047.3	1326.05	4864.98	3255.37	14315.3	17625.5	959.893	7071.19	0	2883.65	0	933.644	0	10122.7	18136.2	7189	3486.02	8453.69	0	44975	37732	38793.4	12723.8	7645.55	56814.7	28696.2	42766.2	80738.4	13491.5	8489.87	7609.85	21854.2	22622.4	17973	27942.6	16624.1	35987.9	38075.8	25035.4	43729.7	146138	166259	156961
FFA 18:4 +2O_mz_307.1916_RT_1.76	10463.6	14344.9	107770	274494	249201	193117	20229	66080	36870.9	5070.4	36965.7	0	217955	38772.1	24634.3	205470	70055.9	91807.6	46379.6	103397	40617.7	135322	100699	89844.7	192951	133767	137986	16705.3	129295	159034	370802	128948	430488	62318.6	13928.3	51501.9	61340.9	103303	74966.6	143895	111858	127126	114156	199973	215573	526531	285701	1.5209e+06
FFA 18:4 +2O_mz_307.1917_RT_3.98	2496.77	918.539	0	35103.3	22323.9	24961.9	6286.82	17018.1	14782.6	8817.99	8989.84	3827.2	245655	0	96826.1	33102.2	31857.2	137338	16529.1	13153.8	10014.4	338265	451826	550819	354254	257067	195640	15819.7	26468	1.68395e+06	483117	221026	1.55627e+06	0	0	500533	15901.8	7171.32	12706.1	188409	493862	271129	35587.5	1.10314e+06	920983	725562	93360.1	64256.8
FFA 18:4 +2O_mz_307.1916_RT_6.08	0	2815.26	19745.3	6189.13	6049.18	5080.17	0	1043.81	0	414.465	0	0	18145	21746.7	5649.91	254.262	298.38	810.213	1640.25	1233.64	853.611	12047.1	16777.5	14044.6	33089	72306.7	62843.8	1148.38	1796.53	296988	52270.8	32971.1	267945	1005.89	962.06	404314	243.828	337.911	475.785	277950	449256	410766	46705.3	825544	696112	737282	33191.2	25637.3
FFA 18:4 +3O_mz_323.1864_RT_1.75	37266.9	53732.1	254035	200203	128493	124649	161556	0	152130	76175.1	160395	45090.2	201631	73130.7	104206	69557.2	63836.9	62558.7	218305	265015	246640	795327	809549	515119	679707	759108	598964	138550	461377	793891	799730	296269	1.5065e+06	130467	61499	182478	316447	164866	230702	383444	409731	315394	253128	352282	436015	1.64018e+06	903804	965075
FFA 18:4 +4O_mz_339.1808_RT_0.92	48683.4	80317.8	385456	110789	74947.9	77467.2	207418	194885	106375	81728.3	200135	59474	175486	0	81185.4	75073.1	27007.4	88410.2	165200	179391	191082	461215	465297	249251	391258	367152	320755	172122	486495	1.03535e+06	722265	289149	1.51274e+06	147917	100882	165082	691031	272880	244893	365714	204175	254644	232465	391631	341274	859988	603673	558838
FFA 18:4 +4O_mz_339.1812_RT_1.54	6206.01	6030.92	16644.8	3495.42	13526.6	14586.3	98926.2	146067	64233.6	54036	93371.1	42242.1	147415	0	63702.1	51324.5	26600.3	98961.8	72837.8	129380	118740	338161	332863	144843	213417	442317	177674	83148	286188	574455	461431	159301	940937	92645.2	53640.8	144934	423599	115140	148811	224813	659838	506581	125592	967170	221661	943755	321366	426638
FFA 18:4 +4O_mz_339.1812_RT_2.98	0	0	12468.7	2506.92	1498.11	2144.87	2982.99	5624.32	5511.06	2083.09	2407.67	2336.91	12936.4	3782.11	8813.95	0	484.909	1771.35	4065.51	6304.63	490.766	22287.2	24156.8	13892.6	4293.18	2199.87	1318.17	2601.97	15430.3	19212.7	41005.1	24848.4	75304.9	5232.53	1754.7	33113	6566.56	5523.75	5278.01	33420.4	72656.9	46278.1	5172.86	58714.2	22592.4	52986.5	37814.7	31929.1
FFA 18:5_mz_273.1862_RT_7.25	315811	789978	4.31261e+06	9775.7	11814.1	7126.42	15635.1	2221.85	3076.05	1081.27	3808.59	1843.14	2.11271e+06	1.67196e+06	721331	421346	489859	784926	19091.2	20315.2	113799	1.30663e+06	1.16862e+06	1.34212e+06	1.33054e+06	1.33615e+06	1.14524e+06	3845.54	18536.8	3.95201e+06	1.64647e+06	623155	4.1703e+06	19038.7	5751.47	5.67039e+06	7159.41	9724.8	9455.1	4.47576e+06	1.12853e+07	6.29828e+06	477586	1.31178e+07	1.2912e+07	2.09898e+07	2.25192e+06	826279
FFA 18:5 +1O_mz_289.1811_RT_2.8	9298.39	23324.1	145392	207420	210134	143207	42409.2	13364.8	29159.8	12323.2	14814.8	10110.8	235992	340796	94432.5	21801.7	18335.2	22527.2	54424.9	64394.2	57142.1	101328	121244	956867	2.97571e+06	3.57323e+06	3.57431e+06	17866.7	51130.1	649008	157558	333349	2.30472e+06	44621	14496.9	264450	19679.6	19668.7	23667.2	212427	725531	161161	189675	1.12668e+06	1.07009e+06	1.89841e+07	894258	866342
FFA 18:5 +1O_mz_289.1811_RT_4.04	899.095	0	5021.2	22944.8	14670.5	14399.4	17034.6	6914.41	41615.1	6869.03	4460.37	9808.53	1.24919e+06	808659	193722	105470	81910.5	151491	12285.7	11036.8	16207.2	1.63326e+06	2.00222e+06	921696	1.26465e+06	814007	658307	13203.7	35418.8	5.63907e+06	1.39868e+06	659312	4.96587e+06	13434.2	8154.04	2.81457e+06	8531.12	8489.85	13700.8	892923	1.91244e+06	1.011e+06	120096	4.39524e+06	3.20329e+06	2.36661e+06	426126	332048
FFA 18:5 +1O_mz_289.1811_RT_6.56	616.61	1139.49	6876.9	0	0	134.616	872.818	824.452	180.629	13239.8	237.395	246.922	7171.34	3809.09	2220.43	0	0	0	11381.8	49.68	1357.89	11942.1	6294.74	3508.92	2815.6	4237.69	7201.3	14325.7	3667.55	6822.69	44022.3	5782.81	20605	1208.67	0	4806.12	14590.1	0	206.928	3176.26	7126.69	6832.89	5208.26	5740.27	10054.2	17184.1	190.205	2220.83
FFA 18:5 +2O_mz_305.1759_RT_2.06	2232.93	3185.1	24486.6	33106.4	21741.3	22945	70264.3	62895	103343	31471.7	54266.8	22731.3	214818	119622	98901.1	56963.9	76004.5	155941	152783	160225	172024	434284	479600	387828	570947	723518	662614	60419.8	228377	500256	566097	211652	1.03566e+06	94494.6	26391.3	235362	221118	531091	96933.9	405163	562976	476051	484346	1.29176e+06	793203	1.89713e+06	1.02219e+06	930355
FFA 18:5 +2O_mz_305.1759_RT_2.15	2232.85	2234.04	35428.6	23694.5	16072.1	17411.3	45130.5	45355.1	67572.3	20331.9	31620.5	17967.5	169591	133791	63356.5	32108.6	40908.7	74481.4	126019	125758	135020	430150	417584	332805	446366	529655	458401	43263.3	150375	404252	468776	162555	658442	56462.6	20929.6	191067	79306	38255.5	73618.2	341056	454812	355471	253704	789533	851539	1.75159e+06	727469	765136
FFA 18:5 +2O_mz_305.176_RT_3.38	3297.02	3634.71	8957.55	43522.7	10799.9	12315.8	22377	22679.9	35336.1	11551.2	15998.2	9056.98	235330	137538	54849.3	15892	11439.4	21390.5	6918.38	8933.96	10271	301575	348054	264238	244882	154008	118568	15392.1	59417.3	525980	159640	60167.4	481806	22824.8	13363.8	142251	29446.4	78997.2	24102.6	112134	239838	91056.7	53399.2	348183	263368	666523	213476	177901
FFA 18:5 +3O_mz_321.1703_RT_1.09	65500	81100	496000	171000	107000	104000	123000	105000	81900	86900	97600	52500	177000	17900	85300	46700	91500	2260000	104000	126000	118000	271000	286000	195000	294000	351000	255000	96800	312000	600000	457000	186000	1000000	66500	72300	88700	270000	145000	126000	305000	167000	111000	165000	214000	201000	839000	543000	627000
FFA 18:5 +4O_mz_337.1659_RT_1.32	48800	89800	443000	102000	65400	64800	149000	145000	61100	64800	250000	43708	138488	286.602	109795	79380.7	35460.8	197639	115163	102925	109954	426288	409616	263856	267458	292630	184596	153143	278976	722843	608860	153310	1.08714e+06	74828.1	78059.9	154174	451462	204889	145394	316544	438596	328327	213337	569246	389031	1.68851e+06	992271	733123
FFA 20:0_mz_311.2957_RT_12.19	175551	156672	912737	44077.5	8463.7	19168.9	17723.6	4734.59	7521.55	10701.7	14840.9	0	42824	0	19804.1	12908	12146.6	34707	9122.85	11572.9	3931.58	75415.6	107321	65658	62815.1	322189	44393.2	9410.62	42412.7	157109	155717	37100.4	333382	3573.68	4512.37	23929.6	43254.8	11543.1	6891.12	72923.1	65275.8	43869.3	27972.2	57057.8	32663.3	30417.1	27453.1	30066.1
FFA 20:0_mz_311.2957_RT_12.8	91836.4	83829.1	459017	16622.2	7452.64	8669.37	66123.2	15826.4	47987.6	20558.6	12225.5	0	128437	0	83090.6	32824.8	65577.3	0	7899.08	0	5847.92	200206	221816	153268	37923.9	44564	22715.9	16632.7	143699	271528	256590	52595.9	434645	5176.73	59530.1	47532.8	212039	50899.3	19103.6	111610	209254	131636	69536.1	88411.3	29185.5	90361.8	135530	8667.73
FFA 20:1_mz_309.2801_RT_11.49	46730.3	53595.2	271907	24488.1	12158	12734.5	2872.14	2632.74	3944.32	0	0	0	67709.5	36449.3	25287.6	6826.69	3814.21	6747.84	0	0	0	67102.9	56091.9	79096.8	24594.2	18592.9	6744.27	0	9959.98	75058.1	42821.5	20792.1	103087	3340.02	5452.97	29576.3	12277	8949.83	0	46044.2	106568	46554.8	6992.22	64378.1	52792.9	17895.5	13699.9	0
FFA 20:1 +1O_mz_325.2749_RT_8.57	4170	5150	13300	5190	3030	2560	16900	4890	23400	3330	15400	3666.38	156342	18237	13427.1	0	0	0	12087.5	8126.62	15106	45275.8	107457	89393.4	49733	46437.5	54826.1	79016.2	28521.2	134647	115006	63809.6	248374	57216.4	56133.9	63970.9	60582.5	73257.2	66620.1	65136.1	10411.1	49226.4	93964.6	165819	123631	385887	220841	220633
FFA 20:2_mz_307.2644_RT_10.45	1601.93	0	0	268.835	515.671	402.647	4707.38	1379.68	0	0	831.494	0	16902	9616.59	11729.4	0	0	712.496	0	0	0	18459.6	21317.4	20363.9	3419.92	4781.75	2383.3	0	5164.84	33550.8	13633.1	6051.21	59804.7	0	0	80560.7	7721.56	2596.49	0	97520.8	251749	112356	5034.79	210225	207419	97426.8	50998.8	11732.4
FFA 20:2 +1O_mz_323.2593_RT_7.89	1035.98	0	0	770.469	294.612	0	11503.1	9632.5	8024.09	10215.2	9957.79	7442.48	26367.4	10765.1	11600.4	0	0	0	4466.55	5676.01	10904.6	22138.4	38902.6	22587.7	16538.4	21613.6	39648.4	5588.98	30326	64158.1	46941.8	35592.4	162519	16381	13763.6	17532.4	23172	16730.9	23094	30660.7	9996.4	25177.7	14711.8	30430.8	32542.2	483927	120645	72224.9
FFA 20:2 +1O_mz_323.2592_RT_8.88	0	0	0	9128.45	4022.17	3992.97	6374.72	5392.62	29933.3	7230.94	7611.11	21975.8	27118.3	17542.8	42058.1	0	0	0	6527.02	6489.97	6717.3	35115.5	37322.9	36051.3	0	0	3325.05	8053.45	14571.6	51655.8	42039.1	22525.5	108253	9178.92	1551.53	10752	7479.05	9668.2	6382.98	31480.8	15058.5	24296.9	4441.31	18130.8	7825.57	38192.3	7714.36	1033.33
FFA 20:2 +2O_mz_339.2541_RT_6.46	1770.43	1805.9	5719.49	520.13	283.672	221.293	12397.9	9026.3	8886.47	2065.76	6984.97	9572.55	15917.6	0	3334.1	0	0	0	8728.22	14389.7	13672.8	26218	24646.1	6380.83	13464.1	15559.2	10649.3	11145	29810.4	103470	47921.1	8908.66	139657	1637.61	0	3590.08	4662.54	8727.1	20153.7	21918.4	0	159.422	603.33	6462.74	0	31312.8	0	0
FFA 20:3_mz_305.2488_RT_10.33	771.255	865.464	0	0	95.0797	113.576	2570.75	1594.31	1537.63	0	3285.44	0	40475.7	34006.7	10118.9	15303.4	20524.8	21902.9	0	0	3443.79	24815.1	21857.8	67876.3	23312.4	23846.9	21029.9	0	0	37885.3	51518.2	23216.3	112063	2556.34	0	299887	2578.54	1484.32	1361.31	589526	1.20116e+06	586495	10701.2	759555	780517	519824	349494	116635
FFA 20:3 +1O_mz_321.2435_RT_6.98	0	0	5205.71	441.089	363.04	241.059	27460.8	32618.6	18746.6	11789.5	18313.8	11167.4	49837.8	26399.4	24660.6	0	0	0	12434	13196.6	15708	71434.7	77992.4	56654.1	80297	135902	159138	11020.7	34158.6	131058	61750.6	52519.5	248065	37148	11228.1	74183.5	13782.2	15303.1	22867.9	84628.9	87169.3	85344.9	18030.6	138169	179348	1.07277e+07	790874	591362
FFA 20:3 +1O_mz_321.2436_RT_8.06	0	0	0	0	0	0	47619.9	70998.8	50048.5	18874.2	17938.4	19782.5	79706	75466	48725.1	0	0	0	21213	20811.1	14786.3	103708	123253	68873.3	2754.97	3463.58	9671.3	14760.1	38609.2	145401	86153.6	116179	205032	67976.3	21933.5	52880.7	15727.8	15179.9	19698.3	77827.1	53103.4	84091.3	5362.06	30852.4	37495.5	0	15469.2	22020.8
FFA 20:3 +1O_mz_321.2436_RT_9.29	0	0	0	0	0	0	0	1372.71	401.173	117.305	0	353.716	40547	461.627	34773.8	63433	156262	166900	163.936	785.417	8931.29	51104.4	16810.7	0	30385.6	22942	7443.12	630.134	2040.64	742388	480.351	70740.9	32549.4	3070.32	524.738	97212	3220.37	4432.72	1882.38	45263.2	0	61.6587	12392.6	0	0	4236.84	0	0
FFA 20:3 +2O_mz_337.2387_RT_2.65	19758.7	44906	194217	179577	211110	101854	50513.8	51857.6	41819.7	51580.5	64717.1	52870.2	139978	93618.8	94030.6	105097	99909.2	149383	187345	198124	236821	518486	533691	417689	941387	1.14317e+06	877922	143609	273019	591118	584917	331860	1.40082e+06	118569	100786	206950	198073	216475	171385	487148	231520	349758	440591	704539	626852	1.8081e+06	1.07361e+06	1.31943e+06
FFA 20:3 +2O_mz_337.2386_RT_4.38	38589.8	48882.8	238868	700102	537898	395812	50387.7	78977	66420.8	34229.6	40846.5	23856.5	754040	434843	244931	247160	228050	434303	111512	92816	149379	682381	662203	549655	5.43542e+06	3.66369e+06	5.585e+06	155790	156663	1.05988e+06	864685	323030	949298	117314	92243.7	1.35735e+06	109036	222553	182011	1.0111e+06	1.7016e+06	1.5397e+06	628079	4.49777e+06	3.02009e+06	1.85824e+06	853715	1.49822e+06
FFA 20:3 +2O_mz_337.2387_RT_6.47	19442.5	6082.84	50966.6	22614.2	14687.9	14950.3	13974.7	24350.4	17170.7	11891.1	33778.4	1950.96	225320	19298.7	69011.1	19048.3	18126.9	38859.5	144059	55126.4	234023	459283	419785	110314	460542	526025	664943	172055	92579.7	557231	280899	499529	258272	157035	137845	200761	176132	292161	289633	226068	72519	77154.9	784350	204105	166863	89259.4	54515.1	1.05273e+06
FFA 20:3 +2O_mz_337.2387_RT_7.68	36246.9	29101.9	159255	4219.51	3570.89	2959.1	20572.4	37481.4	18548.7	16668.6	22215.9	12905.2	131685	35590.9	73826.4	15244.2	20242.2	47335.1	48726.1	55304.4	60637.7	189932	198101	146041	525966	575295	530659	23987.9	56467.4	214236	237892	123715	777080	25798.4	18844.6	110005	34582.8	28818	38845.2	178177	152166	140119	49559	276519	170905	127010	114860	225087
FFA 20:3 +3O_mz_353.2335_RT_2.14	1872.02	661.52	0	330074	172135	222536	42294.6	37046.1	32121.4	29470	45034.2	29128.3	124448	115585	68039.6	54821	44573.8	90060	93551.4	145141	144921	254100	313298	212282	226263	275412	239179	53899.9	114744	370103	306987	126744	635669	70966	37715.6	151561	119647	94030.8	68142.2	216396	617646	342621	194725	643438	866229	6.41678e+06	1.60923e+06	1.86054e+06
FFA 20:3 +3O_mz_353.2336_RT_3.32	0	664.414	0	386450	229152	276173	27132.1	31919.9	15868.2	7765.17	14079.4	8754.27	74737.4	45075.1	23158.7	4192.95	1282.08	13298.5	18113	22130.5	25144.4	98493.1	105842	85615.3	44695.3	53135.1	61033.9	14025.7	50370	119015	128650	51499.4	316090	27170.1	9004.76	32780.7	29638.3	30288.8	31705.8	107945	164768	104483	26902.2	124081	139424	1.05888e+06	303124	251623
FFA 20:3 +3O_mz_353.2336_RT_3.95	22285.5	5769.22	14440.2	16014.9	4448.67	4725.47	13788.4	24857	18445.4	10917.1	21644.2	10269.4	119914	100530	30187.5	16648.2	12320.7	16374.5	41348.8	43207.5	52873	177916	209972	169931	154523	176512	145599	26498.8	58738.9	142113	149927	97515.1	733217	33153.2	21367.4	67028.3	39128.3	41873.3	40933.4	252052	369872	190014	39811.6	274228	328617	1.80423e+06	867177	280031
FFA 20:3 +3O_mz_353.2335_RT_5.03	2200.98	0	6183.22	1719.32	380.825	145.18	0	4513.43	646.034	671.168	673.305	1079.2	9592.14	13052	3124.94	0	0	0	1928.44	3736.46	3584.89	7552.72	8276	6476.37	295.722	688.019	0	1097.5	6317.41	9691.44	14856.8	8936.58	17964.3	1494.23	2222.63	11305.5	807.968	1411.68	2149.82	16455.5	34107.8	27461.8	4313.8	29906.3	57955.9	88084.6	32526.9	32667.8
FFA 20:3 +3O_mz_353.2336_RT_6.47	0	0	0	0	0	0	0	547.27	0	0	422.487	0	20611.9	13243.2	5006.65	2197.12	980.228	1425.1	826.665	989.855	332.856	14019.6	9602.06	8881.34	16732.9	5591.72	3508.86	306.012	2361.58	28601.4	22381.3	7420.64	48930.1	668.741	970.598	42130.6	696.619	788.969	428.193	62662.4	53638.5	40428.1	2259.83	160714	109749	121080	3255.65	2522.91
FFA 20:3 +3O_mz_353.2336_RT_6.98	0	0	0	0	0	0	698.876	0	93.8332	0	237.262	189.35	30747.1	15562.1	5833.14	2795.55	1984.08	1809.86	0	285.982	833.676	16834.2	9827.76	7274.76	16924.5	6843.43	3276.46	547.332	619.051	30351.4	27452.4	5696.17	12531.4	27.4493	0	57199.5	423.186	1308.19	0	85259.1	85559.4	66360.6	1378.49	205378	169044	578773	785.779	987.992
FFA 20:4_mz_303.233_RT_8.94	62882.7	9202.21	32608.7	6500.25	476.467	1528.8	116869	70730.6	7717.9	31909.9	28313.8	10581.2	178855	133573	228574	75924.7	54046.8	104700	21193.6	17282.7	47597.5	264365	153600	303672	40991.8	59871.8	87659.5	12711.2	27004.4	279691	364588	106434	694338	158694	40212	913594	52830.8	23398.7	76574.1	2.49314e+06	4.06571e+06	1.99731e+06	80779.9	2.6581e+06	3.40399e+06	1.02076e+06	1.02994e+06	398946
FFA 20:4 +1O_mz_319.2279_RT_2.82	844.028	739.004	0	15503.3	17579.7	8903.01	25579.5	10789.7	7166.12	6144.12	11047.6	6715.91	28055.1	16555.9	16572.7	20142.9	13414.2	22668.8	32350.1	36676	37480.2	101835	114819	83868.2	185288	230876	176275	24951.7	42773.1	99498.5	117818	59369.6	222363	30569.8	20725.2	133095	37773.4	38871.9	28650.8	207904	395544	57618.5	76266	128798	228107	290538	221745	253402
FFA 20:4 +1O_mz_319.2275_RT_4.57	0	0	0	133000	97800	103000	16900	12400	8370	2680	7940	5340	62900	35300	20200	16900	14600	26300	10800	8610	8960	70900	66600	42200	483000	327000	416000	4850	8170	110000	64500	35200	108000	23800	5440	109000	8330	10700	5350	122000	191000	386000	21300	942000	251000	3650000	335000	243000
FFA 20:4 +1O_mz_319.2279_RT_5.95	2300	0	0	8270	5320	4470	34800	52800	56800	25200	23200	36100	285000	136000	98700	7160	9770	11300	40800	39000	40300	629000	641000	515000	1310000	2050000	2200000	27200	45600	834000	373000	247000	1140000	87500	21200	486000	31200	22300	23200	407000	992000	536000	62300	1310000	1190000	33300000	3910000	2640000
FFA 20:4 +1O_mz_319.2279_RT_6.82	1050	708	0	2620	2060	1560	43400	39100	34600	17000	17500	18600	123000	51600	47500	0	0	1660	32000	27100	25700	214000	265000	194000	444000	74000	604000	13900	39800	220000	168000	162000	436000	67700	16600	143000	24700	21300	20400	260000	488000	292000	33000	288000	128000	13100000	528000	284000
FFA 20:4 +2O_mz_335.2229_RT_2.79	5877.88	10103	26724.8	111442	26619	76081.2	247446	122604	179704	46749	51556.6	38304.9	455214	223362	122429	41162.7	63967.4	46951.6	129606	107731	73079.7	672106	433667	308124	383761	423510	448586	39998.2	277601	814833	625921	376114	1.29472e+06	269044	35982.1	331651	125763	77419.3	73213.5	462371	405925	561969	96848	735912	583889	3.60358e+06	975134	840723
FFA 20:4 +2O_mz_335.223_RT_6.5	0	0	0	0	119.417	0	6589.79	16740.7	7519.22	4354.97	9382.16	3309.07	82102.1	30807.4	34534.8	18650.6	12862.4	28953.5	9313.97	8915.09	3975.98	200483	167163	144713	189976	138658	86443.8	3537.54	8362.94	347063	237240	73284.8	496342	12695.1	3051.12	120120	5681.76	4206.26	7908.63	208256	146819	160560	4617.83	241903	127387	0	114024	66732.4
FFA 20:4 +3O_mz_351.2177_RT_1.89	1410.33	0	0	49268	37330.4	37380.4	549648	118422	139029	149785	190630	129477	4.18603e+06	5.56727e+06	1.07423e+06	429945	675437	577900	3.75883e+06	4.56662e+06	3.98841e+06	9.93285e+06	1.1195e+07	8.50832e+06	9.49466e+06	1.04082e+07	8.69223e+06	648230	1.09632e+06	1.2044e+07	6.57974e+06	2.5864e+06	2.03401e+07	0	802769	4.40903e+06	1.52535e+06	1.53403e+06	1.31665e+06	4.70313e+06	9.18741e+06	4.56058e+06	4758.36	1.21239e+07	1.47013e+07	0	2.10122e+07	2.5699e+07
FFA 20:4 +4O_mz_367.2126_RT_1.58	184644	307843	1.51268e+06	553247	397421	378545	176390	147233	123447	160494	213084	75686.2	513051	214940	419588	620036	676749	793274	496631	314759	509659	1.39669e+06	1.28747e+06	854531	1.5191e+06	1.83799e+06	1247789	428852	642933	1.59234e+06	2.11195e+06	876505	3.69222e+06	281838	289175	377819	816058	466292	375717	1.20674e+06	1.15065e+06	911713	1.08253e+06	1.70657e+06	1.6826e+06	6.03261e+06	4.70616e+06	3.77163e+06
FFA 20:5_mz_301.2172_RT_8.43	93494.4	263417	1.14142e+06	9274.51	4177.38	3400.3	1.08981e+06	43697.7	25705.8	182062	21085.9	13202.1	1.32882e+07	1.35585e+07	1.49641e+07	5.8943e+06	8.51128e+06	1.33268e+07	121244	30598.2	4.87615e+06	3.57503e+06	2.81925e+06	1.39887e+07	2.33201e+06	4.26137e+06	4.90869e+06	44589	46746.6	1.26421e+07	2.09464e+07	8.7436e+06	3.34882e+07	816885	38268.5	9.47059e+07	37762.2	68372.1	33530.7	2.09684e+08	1.40269e+08	1.34084e+08	5.37456e+06	1.48499e+08	1.72167e+08	1.68682e+07	2.62561e+07	1.19342e+07
FFA 20:5 +1O_mz_317.2119_RT_4.91	200825	442282	2.62672e+06	1.43452e+07	1.32871e+07	1.06197e+07	132965	18160.2	61149.1	62221.3	124123	111757	1.95589e+07	1.65927e+07	8.23143e+06	2.911e+06	1.9217e+06	2.96232e+06	344036	557757	778682	3.68627e+07	5.25169e+07	3.66442e+07	1.10705e+08	186169724	1.93356e+08	406751	1.05152e+06	6.31334e+07	2.14051e+07	9.14212e+06	6.80431e+07	288676	258364	2.70835e+07	368915	1.85751e+06	387721	1.49508e+07	4.24496e+07	2.03286e+07	3.14611e+06	5.463e+07	4.941e+07	5.90534e+08	4.09718e+07	2.95705e+07
FFA 20:5 +2O_mz_333.2073_RT_2.08	0	0	0	0	0	0	501985	50818.7	53658.9	35511.4	54380.6	28068	1.1191e+06	1.03337e+06	342618	245151	214144	179809	990357	1.14322e+06	697233	3.05332e+06	1.98123e+06	1.87113e+06	2.9114e+06	3.19753e+06	2.31978e+06	183809	351564	2.40467e+06	1.94638e+06	869307	5.31012e+06	583323	115167	670267	199318	228244	175590	780785	1.39909e+06	1.16872e+06	825423	6.7623e+06	6.45682e+06	1.40273e+07	7.65028e+06	5.63608e+06
FFA 20:5 +2O_mz_333.2072_RT_3.03	229863	655232	3.72383e+06	4.96899e+06	3.84725e+06	3.13189e+06	298795	89584.6	115251	167571	173477	88420.5	1.61497e+07	1.92473e+07	4.77014e+06	2.33386e+06	3.26288e+06	4.89209e+06	2.42524e+06	2.60153e+06	2.70922e+06	1.41183e+07	1.96378e+07	2.07606e+07	3.48999e+07	3.52194e+07	3.3313e+07	423265	620135	4.49558e+07	1.39993e+07	7.09475e+06	3.1062e+07	898995	664519	1.83121e+07	986274	1.12893e+06	1.2546e+06	7.16094e+06	2.03888e+07	1.09736e+07	6.68099e+06	4.74781e+07	4.63748e+07	3.78484e+07	1.53865e+07	1.98214e+07
FFA 20:5 +2O_mz_333.207_RT_5.27	8804.63	28638	211746	137505	7390.09	86352.8	14081.5	10114.3	12688.5	11354	8009.46	4036.97	1.54764e+07	7.31939e+06	3.89598e+06	2.72832e+06	2.16074e+06	3.62517e+06	66775.2	66358.6	127665	1.57914e+07	1.31917e+07	9.15604e+06	1.37885e+07	1.01077e+07	6.2343e+06	41015.2	70019.2	3.46685e+07	1.55316e+07	5.22289e+06	3.54767e+07	30605.5	25320.4	1.29061e+07	41472.7	31607.7	31130.4	1.31452e+07	1.03347e+07	9.006e+06	879858	1.5952e+07	1.25176e+07	1.32956e+06	1.92798e+06	676604
FFA 20:5 +3O_mz_349.202_RT_1.84	112434	175074	890541	999628	691665	672338	655179	167422	176251	114675	151427	80447.9	737061	475343	417128	283501	290240	469479	753243	828926	794907	1.05558e+06	2.33097e+06	742704	2.86809e+06	4.4613e+06	2.75728e+06	438560	792976	2.24437e+06	3.3828e+06	1.67922e+06	6.90035e+06	1.03889e+06	455600	1.30495e+06	1.08323e+06	878642	805676	2.7922e+06	2.66727e+06	2.25855e+06	2.71517e+06	5.24318e+06	4.37498e+06	4.80237e+06	4.94197e+06	1.13725e+07
FFA 20:5 +3O_mz_349.2022_RT_3.45	0	586.154	6098.33	363037	116350	237426	42626.2	22769.2	35830.7	10027.6	12115.7	7229.91	408598	558472	176319	62293.2	59189.2	118434	27093	23174.6	32797.2	316827	337863	356348	391950	369272	318670	12335.1	59278.9	1.85004e+06	431483	188169	980552	72980.1	12348.1	2.32134e+06	32858.5	22906	26692	620463	1.60036e+06	441567	229355	2.76461e+06	1.29943e+06	308512	339938	282521
FFA 20:5 +4O_mz_365.1969_RT_1.32b	70625.2	167481	944505	267774	172691	170517	120313	118693	62202	58599.4	171872	43238.1	193669	97422.3	101979	211092	126798	126059	208349	142613	173429	309790	317810	287110	744020	748652	589613	202988	226995	427927	505178	415596	2.10278e+06	243640	178989	8.24831e+06	510637	451300	390341	7.8905e+06	2.03855e+07	1.72735e+07	1.97344e+06	2.41291e+07	1.41047e+07	2.03727e+07	1.48393e+07	1.22749e+07
FFA 22:0_mz_339.3268_RT_14.31	82598.5	188749	447057	107330	49294.9	47120.9	118675	88697.6	109676	156518	132438	100001	483439	195193	364085	390249	428159	0	276314	295821	225882	603433	573107	444179	316904	355548	254821	150050	375983	940843	528170	152900	775805	14786.4	34473	56912.3	138880	27064.9	14931.1	163927	367202	190838	54931.3	130868	94521.8	324466	479067	221594
FFA 22:1_mz_337.3114_RT_13.19	251378	282460	1.55372e+06	76830.7	34452.4	39541.5	0	294.4	2186.11	2831.59	406.701	189.988	60945.2	25960.9	26043	8988.11	16664.4	0	7353.66	716.085	3761.94	86627.8	73437.3	84820.3	51090.1	49373.7	30150.8	0	3238.55	130601	39227.7	7658.95	104784	1155.46	504.792	261071	8787.61	1054.66	1077.14	559404	1.54201e+06	1.1145e+06	38590.6	664340	514801	442709	388102	244918
FFA 22:1 +1O_mz_353.3063_RT_8.91	962.697	945.349	6515.78	0	0	0	10157	4551.13	16111.1	9844.7	8808.31	14159.7	13521.2	5532.91	11168.6	0	0	0	4992.43	12889	18040.6	26865.4	53681.5	48613.8	868.961	5170.23	110.793	3439.44	15397.6	63052.5	14294.2	22763.4	95189.1	12344.8	25586.9	33604.8	10635.5	11582.9	10288.9	22889.3	136970	17130.8	6287.65	12329.9	16602.9	17993.2	18563.3	1852.36
FFA 22:1 +1O_mz_353.3063_RT_9.48	3468.24	2295.67	14053.8	2422.37	589.368	419.386	7887.53	3422.2	1055.45	1934.82	1075.47	633.094	7794.3	0	4229.63	0	0	0	1193.34	1980.96	3429.19	8345.75	13232	12351.7	2378.54	2318.32	3208.19	1652.38	9098.84	26957.8	9417.84	0	41411.8	4468.54	3231.69	7568.35	4138.32	1656.81	1840.92	22662.7	18193.8	15402	54.3027	13762.9	14863.7	134447	14009.6	12630.8
FFA 22:2_mz_335.2958_RT_11.83	0	4255.3	7380.65	0	233.389	0	932.76	927.897	241.096	2583.51	357.851	777.47	7218.28	6595.75	740.955	166.521	585.158	44646.8	641.216	417.538	198.315	12863.6	8186.1	14644.5	6216.76	5023.21	2556	0	1910.85	12751.8	3667.61	441.208	11058.8	212.697	259.921	16584.8	961.099	1089.98	87.2224	40438.3	128243	62160.5	2469.17	43432	33872	9174.61	9572.78	4356.35
FFA 22:2 +2O_mz_367.2855_RT_7.77	0	0	0	0	0	0	18872.9	6099.51	21882.8	7776.12	5912.66	19563.3	12477.9	0	0	0	0	0	8639.74	26180	34381.6	22115.8	49086.1	0	198.806	614.579	2962.3	4138.99	29567.6	89806.5	0	21749.9	93206.4	15606.3	26386.4	31159.1	15012.3	13693.1	13267.4	20224.9	0	12484	7803.26	5878.47	7791.49	29685.5	0	2568.85
FFA 22:3_mz_333.2801_RT_11.07	0	0	27915	0	0	0	9.80289	829.334	1301.22	1805.64	615.267	822.799	1628.1	737.125	0	0	0	0	1436.83	450.556	456.212	2434.02	56.7807	1772.31	0	0	0	0	0	2785.26	993.571	1524.94	3686.45	2058.84	0	8007.46	2289.09	93.5275	153.924	3877.67	7929.94	5627.81	0	7837.02	5322.19	348.043	0	0
FFA 22:3 +1O_mz_349.275_RT_8.74	0	0	0	0	0	0	13467.8	17337.2	13701.5	9504.63	15019.5	9810.84	26910.7	12829	20038.1	0	0	0	7516.34	7827.04	5018.99	37685.9	40019.1	26199.2	2191.42	0	0	7155.15	28556.9	52788	30081.4	33020.6	110517	10925.4	22186.5	18365.9	18818.8	14417.2	22053.7	37626.5	10042.6	32059.1	10218.1	12753.3	12744.6	51357.8	2388.31	477.838
FFA 22:4 +1O_mz_347.2593_RT_7.77	0	0	0	0	0	0	1918.67	5240.93	2327.91	2986.67	6504.63	2157.46	3302.43	4912.97	2852.47	412.018	0	0	1573.46	1256.76	2405.06	5749.93	6308.12	3171.6	19973.4	29095.8	69744.5	524.281	10479.1	13571.2	15351.4	21402.8	66008.8	1217.49	941.041	4243.98	495.532	1565.38	4801.25	3384.82	2542.52	5992.37	241.038	6514.94	8362.21	1.05175e+06	100755	54961.8
FFA 22:4 +3O_mz_379.2492_RT_2.47	0	0	0	1572.67	2153.11	1048.56	11626.2	17320.4	6435.16	6491.23	17268.7	8293.77	10104	8605.49	9907.37	5742.65	3940.85	5777.7	15278.4	15771.2	19440.6	42378.8	28357.2	25136.4	35218.8	29439.7	36586.2	12402.8	31794	54023.5	44362.3	25408.3	100257	17143	15109.2	30220.1	60758.6	27795.1	31260.2	66634.3	72842.5	51336	42216.5	75895.3	86244.2	1.16655e+06	217309	249046
FFA 22:4 +4O_mz_395.2439_RT_1.83	0	0	25041.6	0	0	0	3262.77	0	0	0	0	0	4669.24	5277.44	3042.53	895.418	1228.93	167.349	0	0	2053.23	0	0	11161.8	0	0	0	0	0	297.679	0	1824.84	13152.8	0	0	128867	0	0	0	182803	275775	137062	6364.49	283633	327949	30964.6	58945.6	21377.5
FFA 22:5_mz_329.2488_RT_9.36	0	0	25041.6	0	0	0	3262.77	0	0	0	0	0	4669.24	5277.44	3042.53	895.418	1228.93	167.349	0	0	2053.23	0	0	11161.8	0	0	0	0	0	297.679	0	1824.84	13152.8	0	0	128867	0	0	0	182803	275775	137062	6364.49	283633	327949	30964.6	58945.6	21377.5
FFA 22:5 +1O_mz_345.2436_RT_6.35	0	0	0	0	108.091	0	0	185.246	0	0	0	0	0	103.213	0	165.441	0	579.597	0	0	214.451	4753.22	6180.57	3171.64	1428.35	14053.1	20457	0	0	1074.67	1104.02	571.333	8333.21	321.645	0	8262.49	193.807	22345.8	251.968	3228.33	8798.5	5779.77	682.761	12413.2	21786.5	1.64152e+06	234584	86928.2
FFA 22:5 +1O_mz_345.2436_RT_7.12	0	0	0	0	0	0	0	1976.14	645.95	423.869	1485.93	402.065	5069.12	5045.79	2043.02	786.155	0	0	0	671.791	4232.15	23381.9	30763	33774	108904	86725.9	202340	0	2867.63	48354.8	13986.9	14839.4	136395	459.976	0	47710.5	469.461	1212.24	641.059	28511.3	76240.9	41021	1472.27	103815	104293	8.84828e+06	736732	416826
FFA 22:5 +1O_mz_345.2436_RT_7.67	0	0	0	0	0	0	1834.44	4957.86	1236.37	1592.77	1455.58	1854.89	3281.26	3192.45	1989.24	481.076	314.502	77.5141	1800.35	389.891	1112.66	17602.2	28734.1	23578	46853.5	62023.3	66162	226.822	5158.92	14023.1	9926.98	13818.3	76971.2	4226.54	539.929	13572.2	1378.3	1768.73	2542.41	6511.81	27128.8	17368.2	1298.47	47415.7	31574.5	1.62806e+06	111573	44644
FFA 22:5 +2O_mz_361.2388_RT_2.91	0	0	0	2824.56	3117.97	2126.58	475.957	6875.48	2253.13	69.6514	3665.11	186.026	2860.36	1073.22	1387.91	21.6302	0	0	5255.15	5049.62	5609.92	4212.53	7496.11	1957.76	10772	9784.43	59620.8	2819.97	7794.52	7393.21	5992.32	11677	22814.5	881.487	0	889.799	1119.96	1389.18	3537.3	3042.32	4750.41	6239.17	3957.77	7045.86	5632.55	284131	29780.6	38988.3
FFA 22:5 +2O_mz_361.2386_RT_4.72	0	0	0	0	0	112.43	538.604	4381.63	1073.43	604.763	1634.38	1069.7	2336.21	2392.58	2082.23	461.753	0	185.022	0	0	2692.52	1828.55	5277.95	3019.1	9156.58	8935.08	9921.96	1144.99	6642.6	20912.9	9631.27	10859	18117.2	1830.74	672.765	29001.7	574.531	1131.67	4550.24	51089.5	122385	82833.9	5905.35	172412	61307.5	139840	30660.1	47505.1
FFA 22:5 +2O_mz_361.2385_RT_8.42	0	1912.75	0	0	337.678	165.517	9123.9	1084.86	176.71	1279.92	31.7119	239.85	8375.98	14136.9	6729.98	1867.24	1976.51	651.671	430.45	479.116	5632.1	4780.62	1791.25	10626.4	1027.9	2428.2	5033.59	1213.48	674.693	13447.3	10708.1	11464.3	46393.2	5153.04	5641.25	123474	275.952	7485.64	632.044	290603	76891.2	167013	16341.5	156745	184684	19359.3	16131.3	12861
FFA 22:5 +3O_mz_377.2335_RT_2.21	895.963	1418.81	0	67333.8	52998.7	52861.1	19116.1	44160.9	20926.7	21013.4	32757.1	16868.1	87452.8	57370.4	102482	42665.1	62290.8	64899.9	215066	253875	255795	642883	618807	476439	786360	936899	722075	97929.6	170302	983663	818855	356513	2.47796e+06	104816	95249.1	337685	214691	192983	196948	626297	896646	530078	355630	827392	837589	6.63938e+06	2.11038e+06	2.42854e+06
FFA 22:5 +4O_mz_393.2286_RT_1.6	43124.2	63066.7	342002	125299	87259.3	82011.9	140096	189851	148110	165072	242134	134821	425771	105045	316140	418396	433326	575822	182286	194777	181826	468849	375174	291359	337977	372223	313122	230476	194076	819854	850392	333515	1.33488e+06	56761.1	30953.5	26336.1	202168	78175.7	130937	81737	38742.4	91963	140138	64937.7	65457.3	374819	314943	294026
FFA 22:5 +4O_mz_393.2286_RT_3.65	10549.2	1049.3	0	2987.3	2589.06	972.265	6792.24	13464	9715.98	3244.21	4256.65	2580.11	118507	59939.9	55973.3	12714.5	13790.8	28765.7	206342	226301	247106	461221	476916	416298	448284	517318	472818	16975	35416.7	238679	153084	65357.1	405212	110699	103948	240512	322933	195076	193642	697033	902166	521986	555409	1.06237e+06	903759	6.02802e+06	1.21138e+07	5.6687e+06
FFA 22:5 +4O_mz_393.2283_RT_5.9	0	0	0	0	128.769	0	110.515	703.655	68.9828	343.648	520.845	0	1363.89	872.662	58.5067	0	0	0	261.605	443.196	436.193	1420.44	1561.76	298.472	2591.93	975.81	183.694	115.232	772.578	750.659	0	79.581	2819.51	657.928	3.81373	144.585	0	300.168	23.9574	2242.22	887.203	2110.05	817.95	1934.04	208.558	31116.5	11814.2	11825.9
FFA 22:6_mz_327.2331_RT_8.89	0	0	0	0	0	0	7977.99	0	2998.63	0	0	0	134882	260506	250938	57479.5	102876	34228.3	0	1908.32	14183.5	40865.4	47818.8	211306	29723.2	28600.4	35388.3	0	14412.7	384250	351686	132093	901220	0	0	780541	0	0	0	1.33724e+06	1.38178e+06	855883	32716.3	1.39727e+06	1.89843e+06	78581.1	396970	158003
FFA 22:6 +1O_mz_343.2279_RT_6.18	0	1427.26	12014.8	95975	90921.1	88266.9	300.172	945.177	857.549	462.682	1504.87	1099.14	101355	88399.6	64508	28714.6	20815.8	26904.1	5657.92	11458.2	22856.2	1.20232e+06	1.68855e+06	1.17361e+06	3.94821e+06	6.49995e+06	6.67655e+06	14489.6	29939.9	1.88455e+06	952965	510108	3.18102e+06	2702.44	1223.86	361363	1720.28	14710.1	1162.09	196272	883869	219161	29153.6	776516	864425	7.91563e+06	265080	236468
FFA 22:6 +2O_mz_359.2231_RT_3.75	2367.25	7600.92	50102.5	43755.9	43922.2	24134.3	1155.32	4644.89	2871.19	4367.88	5089.33	3087.9	77244.3	55224.7	40889.6	26905.5	33371.2	41300.8	22717.8	25263.2	35240.4	251500	360588	260764	854317	994613	944666	19837.2	32620.5	1.96933e+06	769503	481551	1.46919e+06	12902.2	12413.4	206261	17497.2	16649.6	18288.2	145865	334180	245191	92268.3	653295	571259	578846	322107	574027
FFA 22:6 +2O_mz_359.2231_RT_6.51	0	0	0	564.253	288.33	0	269.747	1012.61	746.784	455.618	730.9	638.533	24650.4	7625.97	16368.7	15669.3	16524	9756.44	956.562	970.94	859.249	89222	58096.1	28048.4	111800	96107.9	77775.2	2060.48	5961.69	414751	463771	217265	977002	326.576	1227.32	42021.4	537.228	1256.42	773.951	88913.4	41674.6	40018.9	2018.01	43589.9	37563.6	58535.2	26681.9	10560.7
FFA 22:6 +2O_mz_359.2231_RT_7.67	2643.72	7138.08	36387.1	238.112	901.331	197.817	53330	6661.55	6218.91	8778.63	3285.7	3634.49	16610.1	4120.49	8318.97	33.9196	0	0	12984.6	3553.69	4263.06	23664.2	13432.2	7446.32	2375.68	1976.73	1280.59	5474.55	7924.3	16158.7	20325.2	9175.88	41033.8	45857.2	5569.83	6752.87	5499.27	5237.5	4746.64	16934.6	3402.61	9962.84	4121.83	4650.33	2591.46	36427.5	2564.55	2232.6
FFA 22:6 +3O_mz_375.2173_RT_1.72	100116	145952	741161	32055.1	22717.4	24248	83672.1	34162.5	56852.8	13067.6	13148.2	9372.59	31678.6	11590.1	10161.2	15893.1	17070.2	21036.7	20412.1	19320.4	25507.8	79938	45441	59985.9	152747	252072	149030	71309.5	715958	1.61732e+06	138826	30578.8	223326	47779.2	32484.3	16325.9	104948	67941	57610.8	142605	53325.8	71813.4	99848.3	83618	86541.8	612723	755952	833932
FFA 24:0_mz_367.3583_RT_15.75	121744	119497	650689	80588	75826.5	26482.4	155963	121216	137931	123600	51228.2	21968.1	167779	31940.1	74693.2	84149.5	83599.4	0	157572	108303	58619.4	318489	351425	254008	219178	224851	161673	110394	224729	731657	580732	248433	1.12753e+06	44331.6	76734.4	69884.3	361020	66208.1	34881.8	97412.7	168069	64476.2	92750.5	49599.5	63813.5	126126	119027	75582.5
FFA 24:1_mz_365.3426_RT_14.61	3013.3	3429.84	47375.5	1233.77	88.6443	155.763	27539.6	28950.7	31213.6	69826.3	59625.1	37441.3	280964	182743	178716	220514	216627	0	100092	99954.8	72579.2	378618	376917	356706	292232	295417	247783	55682.3	126761	425235	413110	135219	810987	7518.39	7691.07	138778	17171.4	9529.31	9144	173915	330634	224670	46743	283375	237693	302095	226125	157712
FFA 24:1 +1O_mz_381.3375_RT_10.19	0	0	0	1821.57	1006.96	1630.15	14193.6	12216.7	17296.6	10794.8	16050.1	13858.1	6761	5080.23	11759.8	0	0	0	9177.87	15869.8	16626.4	19398.2	42269.9	20891	1832.19	1797.14	3561.96	4024.21	20698.5	65732.7	17259.4	14290.7	61769	17013.9	18622.5	23209.1	13486.1	14352.9	17244.1	17311.1	2418.74	9949.22	8974.37	8364.41	6566.85	1685.2	0	41.3859
FFA 24:2_mz_363.3272_RT_13.53	0	0	0	0	101.123	0	330.595	539.956	432.874	1683.67	1400.14	1166.02	12403.9	11194.3	7209.51	7300.51	3638.93	0	2557.57	3617.31	1608.25	18202	15694	20052.1	12642.4	16584.4	9536.17	1903.89	2081.97	18119	10188.6	6006.65	35505.9	305.328	0	5177.92	309.35	0	0	4793.05	13890.9	7431.9	0	14083.6	12646.4	6969.23	3544.71	2445.25
FFA 24:2 +2O_mz_395.3167_RT_8.65	0	0	0	0	0	0	4826.53	2501.04	5230.14	1360.03	1442.02	3913.93	5271.07	0	0	0	0	0	2238.77	4084.82	4640.98	9666.03	14039	3908	5254.63	8080.33	4111.67	1469.04	9622.35	56419.5	11040.9	13736.4	51625.4	2033.17	2582.05	10404.5	35.332	4641.37	2116.73	11436.3	0	6698.87	988.692	24283.4	14486.8	5935.32	0	0
FFA 26:0_mz_395.3895_RT_16.92	177048	107173	538182	48496.9	10931.5	20081.2	104567	76360.8	101498	76741.9	9638.01	11195.1	48344.9	1140.27	19387.1	7724.11	3014.68	0	63156.8	30044	51395.6	63635.2	106635	42608.8	36604.2	36172.6	13918.7	55791.4	156145	356930	264898	73849.9	395278	36787.1	48241.6	56186.8	217634	47581.1	42746.1	59237.3	65692.2	39746.6	65382.5	58977.3	40427.7	53132.6	5308.11	12912.7
