# Supplementary material for: Viral Infection Leads to a Unique Suite of Allelopathic Chemical Signals in Three Diatom Host–Virus Pairs
Source: Mar Drugs. 2024 May 17;22(5):228. doi: 10.3390/md22050228 (PMC11123003; doi:10.3390/md22050228)
Supplement: Supplementary file 1 [file marinedrugs-22-00228-s001.zip › Supplemental File S1a oxylipin_CFMID.msp]

NAME: 10-hydroxy-decadienoic
PRECURSORMZ: 183.1026679
PRECURSORTYPE: [M-H]-
FORMULA:
Ontology:
INCHIKEY:
SMILES: O=C([O-])CCCC=CCC=CCO
RETENTIONTIME:
CCS:
IONMODE: Negative
COLLISIONENERGY: 30HCD
Comment:
Num Peaks: 42
101.0608031	0.3314848545
105.0709739	0.4726858112
107.0866239	5.1642587685
109.0658885	1.15288883
109.1022739	7.435805773
111.1179241	0.3260573803
119.0866239	1.7921420072
121.0658885	1.446918811
121.1022739	12.128453679
123.0815386	1.8613478649
133.0658885	1.7400883002
135.0815385	11.53234092
137.0608030	0.3367304995
137.0971886	3.7537304492
139.0764532	0.6421677887
139.1128387	18.462537028
141.0921032	0.5774895479
147.0815385	5.304236605
151.0764532	2.0826313784
153.0921032	16.2480988184
155.1077533	0.5741789453
165.0921032	51.754424528
17.00328822	0.667332016
183.1026679	74.2517813823
29.00328822	2.7631981798
31.01893829	0.1937685421
41.00328823	16.877197589
41.03967373	0.6952225496
43.01893830	11.893120673
44.99820284	5.0058836487
45.03458836	4.8962640209
55.01893830	1.397429925
59.01385291	27.894920879
61.02950297	0.9249582035
67.05532376	0.693371057
69.03458836	1.15288883
81.03458836	0.8055994181
83.05023841	1.7492644593
85.06588849	0.4249809069
93.07097387	0.7247173864
95.05023841	1.15288883
95.08662393	0.7145129178
NAME: 10,11-diHEPE
PRECURSORMZ: 333.207133
PRECURSORTYPE: [M-H]-
FORMULA:
Ontology:
INCHIKEY:
SMILES: CCC=CCC=CC=CC(O)C(O)C=CCC=CCCCC(=O)[O-]
RETENTIONTIME:
CCS:
IONMODE: Negative
COLLISIONENERGY: 30HCD
Comment:
Num Peaks: 42
105.0709739	3.2341114001
107.0866239	7.2604759752
109.1022739	5.3692923046
119.0866239	3.303110738
121.1022739	20.719772845
133.1022739	3.696425495
135.0815385	6.8193851467
137.0971886	7.862670672
139.1128387	1.049167514
149.0608030	4.9453439063
149.0971886	10.2239665945
151.0764532	12.362578259
151.1128387	12.386673499
153.0921032	17.218274882
161.0971886	1.595128508
163.0764532	1.986341939
163.1128387	3.4191702027
165.0921032	6.3024115307
167.1077533	7.78661877
169.1234034	2.3570314013
179.0713677	2.846749558
179.1077533	10.376454618
181.0870179	10.440952191
181.1234034	4.520346843
183.1026679	7.335438743
193.0870179	1.682038246
195.1026679	3.778896462
209.0819324	2.0942447036
211.0975824	10.497618268
213.1132326	4.405956637
215.1288826	0.8727220342
271.2067390	3.2048667411
287.2016537	0.7906488815
289.2173037	15.627609309
29.00328822	2.161116101
315.1965683	23.731355179
317.1758328	2.666654349
333.207133	37.782580061
41.00328823	1.796294382
59.01385291	9.14989566
61.02950297	2.012806332
71.01385292	2.326803122
NAME: 10,11-HepETE
PRECURSORMZ: 333.207133
PRECURSORTYPE: [M-H]-
FORMULA:
Ontology:
INCHIKEY:
SMILES: CC=CCCC=CCC1OC1C(O)C=CCC=CCCCC(=O)[O-]
RETENTIONTIME:
CCS:
IONMODE: Negative
COLLISIONENERGY: 30HCD
Comment:
Num Peaks: 48
107.0866239	3.5191617396
109.1022739	7.387971159
119.0866239	1.70424244
121.1022739	3.44335534
133.0658885	0.9832052275
133.1022739	1.9267377003
135.0815385	7.249502601
137.0971886	5.9345445697
139.1128387	2.4311685796
147.0815385	1.047017007
149.0971886	18.735439487
151.0764532	1.1309398048
151.1128387	25.019079126
153.0921032	10.627058774
163.1128387	1.300079163
165.0921032	5.44949005
167.1077533	0.5450090645
17.00328822	1.143992329
177.0921032	1.793096461
179.1077533	11.217555652
181.0870179	6.0400972017
181.1234034	4.8544204781
183.1026679	6.347058501
193.0870179	1.852205487
195.1026679	4.4481038841
197.1183179	2.176571793
207.1026679	0.8686736469
209.0819324	0.5665810308
211.0975824	0.742154633
213.1132326	0.4388139447
223.0975824	0.3751873128
271.2067390	2.0491810051
287.2016537	1.3131083516
289.2173037	11.058227068
297.1860035	0.4027492207
307.1914828	0.359908822
315.1965683	21.6837140247
333.207133	55.17457961
41.00328823	33.956620087
43.01893830	10.999856292
44.99820284	1.007090403
55.01893830	2.807961687
56.99820284	0.7153085289
57.03458836	0.9100401754
59.01385291	11.357310612
71.01385292	2.861413285
73.02950298	1.283741227
81.07097387	0.760675423
NAME: 10,11-HepETrE
PRECURSORMZ: 335.2227831
PRECURSORTYPE: [M-H]-
FORMULA:
Ontology:
INCHIKEY:
SMILES: CCCCCC=CCC1OC1C(O)C=CCC=CCCCC(=O)[O-]
RETENTIONTIME:
CCS:
IONMODE: Negative
COLLISIONENERGY: 30HCD
Comment:
Num Peaks: 50
107.0866239	1.367315395
109.1022739	3.8618348571
111.1179241	5.316640888
121.1022739	1.81851006
123.1179241	3.329187121
135.0815385	6.205387354
135.1179241	1.222946706
137.0971886	5.7149911138
139.1128387	4.3079496346
149.0971886	1.085378898
151.0764532	1.1443950652
151.1128387	21.254117176
153.0921032	10.729505425
153.1284886	22.639257799
165.0921032	5.495286803
165.1284886	1.3083970079
167.1077533	0.5457452223
17.00328822	1.147363376
177.0921032	1.687121207
179.1077533	3.8583411634
181.0870179	6.0124830402
181.1234034	8.659526809
183.1026679	6.4197803585
183.1390533	3.968953104
193.0870179	1.8880102951
195.1026679	4.5117681947
197.1183179	2.290613135
197.1547035	0.2766302336
207.1026679	0.8700971527
209.0819324	0.5805825613
211.0975824	0.7451721774
213.1132326	0.4406762119
215.1288826	0.5568450116
223.0975824	0.3767683238
273.2223890	1.383462668
289.2173037	1.3272630184
291.2329538	11.170430778
299.2016537	0.4032806291
317.2122183	21.7825316138
335.2227831	55.73566771
41.00328823	33.6017163134
43.01893830	10.945901914
44.99820284	1.031953875
55.01893830	2.854015852
56.99820284	0.732703503
57.03458836	0.9180145403
59.01385291	11.457328916
71.01385292	2.931063926
73.02950298	1.31503806
83.08662393	0.7720478067
NAME: 10,12-HepETE
PRECURSORMZ: 333.207133
PRECURSORTYPE: [M-H]-
FORMULA:
Ontology:
INCHIKEY:
SMILES: CCC=CCC=CCC(O)C1OC1C=CCC=CCCCC(=O)[O-]
RETENTIONTIME:
CCS:
IONMODE: Negative
COLLISIONENERGY: 30HCD
Comment:
Num Peaks: 43
107.0866239	1.046924319
109.1022739	12.482146125
119.0866239	0.5466119058
121.1022739	3.8290217065
135.0815385	3.090738515
137.0971886	5.2165700235
139.1128387	4.5123282025
147.0815385	0.9902818139
149.0971886	6.6006353185
151.1128387	7.1395010071
153.0921032	5.131169662
153.1284886	0.4395870857
163.0764532	2.631425363
165.0921032	5.240313089
167.1077533	4.179314173
169.1234034	1.5343652015
17.00328822	1.288249987
177.0921032	6.508657391
179.1077533	11.27688592
181.0870179	3.841808018
181.1234034	5.140709396
193.0870179	6.220455493
195.1026679	6.106275913
205.0870179	2.014451681
207.1026679	4.870691433
221.1183179	0.9191347926
223.0975824	4.6146003881
225.1132326	1.7851406072
271.2067390	4.952597611
287.2016537	1.9672387992
289.2173037	14.596234632
297.1860035	2.3526794691
315.1965683	31.038051321
317.1758328	1.04429944
333.207133	65.8161074
41.00328823	14.3048660472
43.01893830	4.109462825
44.99820284	2.280757455
59.01385291	24.278902099
71.01385292	6.751954669
73.02950298	3.263974305
83.01385292	2.346440099
85.02950298	1.69843931
NAME: 10,12-HepETrE
PRECURSORMZ: 335.2227831
PRECURSORTYPE: [M-H]-
FORMULA:
Ontology:
INCHIKEY:
SMILES: CCCCCC=CCC(O)C1OC1C=CCC=CCCCC(=O)[O-]
RETENTIONTIME:
CCS:
IONMODE: Negative
COLLISIONENERGY: 30HCD
Comment:
Num Peaks: 46
109.1022739	1.8437120766
111.1179241	11.968087519
119.0866239	0.5191799049
121.1022739	1.025952491
123.1179241	2.3069524588
135.0815385	1.9281992179
137.0971886	1.29224151
139.1128387	3.780249292
141.1284886	4.6180586968
147.0815385	1.003244882
149.0971886	5.931350416
151.1128387	2.934022483
153.0921032	5.272152605
153.1284886	4.8092833904
155.1441388	0.4467076395
163.0764532	2.720984195
165.0921032	5.383798732
167.1077533	0.689067059
169.1234034	3.7105288683
17.00328822	1.334534432
177.0921032	6.66280461
179.1077533	5.614049628
181.0870179	3.9707990141
181.1234034	7.778625367
183.1390533	2.6254588261
193.0870179	6.422696791
195.1026679	6.297792401
205.0870179	2.080940402
207.1026679	5.016283009
223.0975824	4.7790143917
225.1132326	1.8437877789
273.2223890	4.838875161
289.2173037	2.0276526898
291.2329538	14.585959841
299.2016537	0.6476203964
317.2122183	31.788188897
319.1914828	1.080826245
335.2227831	67.40347502
41.00328823	14.7688912871
43.01893830	4.239197623
44.99820284	2.36020141
59.01385291	25.104008764
71.01385292	6.984140692
73.02950298	3.37635032
83.01385292	2.427062709
85.02950298	1.756988854
NAME: 11-HEPE
PRECURSORMZ: 317.2122183
PRECURSORTYPE: [M-H]-
FORMULA:
Ontology:
INCHIKEY:
SMILES: CCC=CCC=CC=CC(O)CC=CCC=CCCCC(=O)[O-]
RETENTIONTIME:
CCS:
IONMODE: Negative
COLLISIONENERGY: 30HCD
Comment:
Num Peaks: 52
105.0709739	1.428456261
107.0866239	2.6833633114
109.1022739	0.4225236002
119.0866239	0.7382913205
121.1022739	13.798649703
123.1179241	1.9508002221
131.0866239	1.166410477
133.1022739	2.010671787
147.0815385	1.565786159
147.1179241	1.492817135
149.0971886	8.3864609498
151.1128387	4.744493989
153.1284886	1.226544181
161.0971886	1.413837424
163.1128387	2.8019869308
165.0921032	0.2115314121
165.1284886	2.6541797512
167.1077533	3.947212333
17.00328822	0.1829521958
177.0921032	1.383623602
179.1077533	3.4899294675
179.1441388	0.1656927871
181.1234034	0.4333650573
191.1077533	1.540811738
193.1234034	1.487741464
195.1026679	1.1816008606
197.1183179	0.7046291589
207.1026679	0.5414853886
209.1183179	0.7879343403
211.1339680	1.3956734315
219.1754388	0.1656927871
237.1496181	0.1656927871
253.1961743	1.0565344403
255.2118244	14.736159717
257.1910888	1.9781312658
269.1910888	2.3600062866
271.2067390	6.1185119657
273.2223890	18.656524438
275.1652682	1.110271313
277.1809182	0.1656927871
281.1910888	5.637285707
289.1809182	0.1379634335
299.2016537	51.856423996
317.2122183	76.77079829
41.00328823	12.9432530259
41.03967373	1.110271313
43.01893830	3.3152084764
43.05532376	0.1656927871
44.99820284	4.4462114593
59.01385291	29.888253187
81.07097387	1.110271313
83.08662393	0.1656927871
NAME: 11-HETE
PRECURSORMZ: 183.1026679
PRECURSORTYPE: [M-H]-
FORMULA:
Ontology:
INCHIKEY:
SMILES: O=C([O-])CCCC=CCC=CCO
RETENTIONTIME:
CCS:
IONMODE: Negative
COLLISIONENERGY: 30HCD
Comment:
Num Peaks: 42
101.0608031	0.3314848545
105.0709739	0.4726858112
107.0866239	5.1642587685
109.0658885	1.15288883
109.1022739	7.435805773
111.1179241	0.3260573803
119.0866239	1.7921420072
121.0658885	1.446918811
121.1022739	12.128453679
123.0815386	1.8613478649
133.0658885	1.7400883002
135.0815385	11.53234092
137.0608030	0.3367304995
137.0971886	3.7537304492
139.0764532	0.6421677887
139.1128387	18.462537028
141.0921032	0.5774895479
147.0815385	5.304236605
151.0764532	2.0826313784
153.0921032	16.2480988184
155.1077533	0.5741789453
165.0921032	51.754424528
17.00328822	0.667332016
183.1026679	74.2517813823
29.00328822	2.7631981798
31.01893829	0.1937685421
41.00328823	16.877197589
41.03967373	0.6952225496
43.01893830	11.893120673
44.99820284	5.0058836487
45.03458836	4.8962640209
55.01893830	1.397429925
59.01385291	27.894920879
61.02950297	0.9249582035
67.05532376	0.693371057
69.03458836	1.15288883
81.03458836	0.8055994181
83.05023841	1.7492644593
85.06588849	0.4249809069
93.07097387	0.7247173864
95.05023841	1.15288883
95.08662393	0.7145129178
NAME: 11-HpEPE
PRECURSORMZ: 333.207133
PRECURSORTYPE: [M-H]-
FORMULA:
Ontology:
INCHIKEY:
SMILES: CCC=CCC=CC=CC(CC=CCC=CCCCC(=O)[O-])OO
RETENTIONTIME:
CCS:
IONMODE: Negative
COLLISIONENERGY: 30HCD
Comment:
Num Peaks: 44
105.0709739	1.488039363
107.0866239	1.279488738
119.0866239	5.3572347623
121.1022739	20.736762838
123.1179241	4.9330405443
133.1022739	3.6810039351
147.1179241	1.484398645
149.0971886	7.6419272165
151.1128387	2.8992076541
163.0764532	0.5826727911
165.0921032	9.477011437
167.1077533	14.014895016
169.1234034	1.13208829
177.0921032	1.308314311
179.1077533	4.0037018063
181.1234034	0.773484119
193.1234034	1.41716245
195.1026679	4.8933359103
197.1183179	0.8304938808
209.1183179	2.4374617175
211.0975824	3.81356987
213.1132326	2.2467093807
227.1288826	0.2246237021
255.2118244	3.5018046079
257.2274745	1.4959770128
271.2067390	13.611594912
273.1860035	1.375045623
283.2067390	5.703098305
285.1860035	1.400017273
287.2016537	3.1111872577
289.2173037	13.817861338
297.1860035	3.8732801317
299.2016537	2.766541966
301.2173037	5.020287754
305.1758328	0.1937681376
315.1965683	36.674127976
32.99820284	0.2356885376
333.207133	64.77611523
41.00328823	9.8515193852
41.03967373	1.284848037
43.01893830	1.363990056
44.99820284	3.9871583337
59.01385291	28.014611719
81.07097387	1.284848037
NAME: 11-HpHETE
PRECURSORMZ: 335.2227831
PRECURSORTYPE: [M-H]-
FORMULA:
Ontology:
INCHIKEY:
SMILES: CCCCCC=CC=CC(CC=CCC=CCCCC(=O)[O-])OO
RETENTIONTIME:
CCS:
IONMODE: Negative
COLLISIONENERGY: 30HCD
Comment:
Num Peaks: 43
107.0866239	1.484640367
109.1022739	1.277185221
119.0866239	1.140845887
121.1022739	7.05679437
123.1179241	22.133293876
135.1179241	3.6707639097
149.0971886	5.9380038287
149.1335741	1.480480849
151.1128387	4.2753015935
165.0921032	2.9442530734
167.1077533	17.774517106
169.1234034	5.536203275
17.00328822	0.1725007946
179.1077533	3.5520836061
181.1234034	2.4920993591
195.1026679	4.8800964179
197.1183179	0.8281305234
207.1026679	1.184004048
209.1183179	2.4307461708
211.0975824	3.815955099
213.1132326	2.2493785211
225.1132326	0.186509773
227.1288826	0.7802743089
257.2274745	3.4117952798
259.2431245	1.5033754449
273.2223890	13.813796686
275.2016537	1.383090361
285.2223890	5.68728342
287.2016537	1.9519423369
289.2173037	2.8189994793
291.2329538	13.965450881
299.2016537	3.8626026703
301.2173037	2.76621624
303.2329538	5.024789619
307.1914828	0.1936721426
317.2122183	36.707716731
32.99820284	0.2355717748
335.2227831	64.97446674
41.00328823	9.8252316618
43.01893830	1.360390056
44.99820284	3.9803899107
59.01385291	27.966908178
83.08662393	1.282248408
NAME: 11,12-diHEPE
PRECURSORMZ: 333.207133
PRECURSORTYPE: [M-H]-
FORMULA:
Ontology:
INCHIKEY:
SMILES: CC=CCCC=CCC(O)C(O)C=CC=CC=CCCCC(=O)[O-]
RETENTIONTIME:
CCS:
IONMODE: Negative
COLLISIONENERGY: 30HCD
Comment:
Num Peaks: 43
107.0866239	0.1958383971
109.1022739	12.043480432
119.0866239	2.2547971856
121.1022739	6.0894985945
135.0815385	0.9830221345
137.0971886	12.211576839
139.1128387	10.473378755
147.0815385	3.482599887
149.0971886	6.7036559887
151.1128387	7.1336202275
163.0764532	1.2726242932
165.0921032	7.609592303
167.1077533	7.8666068959
169.1234034	3.7875327827
175.0764532	2.0658737527
177.0921032	7.4183933739
179.1077533	6.7372468327
181.1234034	2.55020197
183.1390533	1.1011177303
193.0870179	8.274987667
195.1026679	6.435591994
205.0870179	2.740266052
207.1026679	5.5927525967
221.1183179	0.8143003119
223.0975824	4.1870870617
225.1132326	1.5667504394
237.1132326	1.029042337
271.2067390	6.267660691
287.2016537	1.641842738
289.2173037	12.362881351
297.1860035	4.163951569
305.1758328	0.2246280421
307.1914828	1.1388629443
315.1965683	30.69017585
317.1758328	0.9303718537
333.207133	63.92101486
41.00328823	6.0214513228
43.01893830	1.680892221
44.99820284	2.039076789
56.99820284	1.739389051
59.01385291	28.206235497
61.02950297	4.378577235
71.01385292	1.971551155
NAME: 11,12-diHETE
PRECURSORMZ: 335.2227831
PRECURSORTYPE: [M-H]-
FORMULA:
Ontology:
INCHIKEY:
SMILES: CCCCCC=CC=CC(O)C(O)C=CCC=CCCCC(=O)[O-]
RETENTIONTIME:
CCS:
IONMODE: Negative
COLLISIONENERGY: 30HCD
Comment:
Num Peaks: 42
107.0866239	3.5292413717
109.1022739	4.69613621
121.1022739	3.8135577755
123.1179241	22.333129005
135.0815385	6.880219282
135.1179241	4.1711610351
137.0971886	6.3530925495
139.1128387	2.1253115326
151.0764532	1.2743542709
151.1128387	10.806643072
153.0921032	11.428732907
153.1284886	12.884642117
163.0764532	1.211811482
163.1128387	1.5705503
165.0921032	8.2376703246
165.1284886	3.0318915438
167.1077533	5.4514617768
169.1234034	0.3166386203
179.1077533	0.6842643445
181.0870179	6.565363737
181.1234034	11.125939337
183.1026679	7.38761718
183.1390533	5.395308855
193.0870179	2.6977643086
195.1026679	5.779044824
197.1183179	0.2897832747
197.1547035	0.2934583314
209.0819324	0.7197203303
211.0975824	6.841646272
213.1132326	2.928860242
273.2223890	0.4058075612
289.2173037	1.5006113582
29.00328822	2.235502488
291.2329538	12.53260125
317.2122183	22.634758858
335.2227831	58.10273103
41.00328823	7.4054822432
43.01893830	1.630687269
44.99820284	2.373828977
59.01385291	25.534223675
61.02950297	2.261413808
71.01385292	2.557335268
NAME: 11,12-EpETE
PRECURSORMZ: 317.2122183
PRECURSORTYPE: [M-H]-
FORMULA:
Ontology:
INCHIKEY:
SMILES: CCC=CCC=CCC1OC1CC=CCC=CCCCC(=O)[O-]
RETENTIONTIME:
CCS:
IONMODE: Negative
COLLISIONENERGY: 30HCD
Comment:
Num Peaks: 55
109.1022739	7.163480174
115.0553238	0.4273486876
117.0709739	0.4280639879
119.0866239	4.173423988
121.1022739	11.661592209
123.1179241	4.907563599
125.1335741	2.0441719893
127.1492242	0.4273486876
131.0502384	1.316134815
133.0658885	1.653360899
133.1022739	1.031688638
135.0815385	1.152062383
135.1179241	1.293357568
137.0971886	6.321570506
139.1128387	0.9566517583
141.1284886	1.235463744
143.1441388	1.263325164
147.0815385	1.114912557
149.0971886	7.625039696
151.1128387	5.148520392
161.0971886	3.6377196912
163.1128387	6.5806510619
165.1284886	2.695533466
167.1077533	2.367304644
17.00328822	1.200448592
173.0608030	0.4323827146
175.0764532	0.4313685574
177.0921032	4.1655574178
179.1077533	8.507737453
181.1234034	2.571168276
183.1390533	0.4004923371
185.1547035	0.4273486876
189.0557177	1.12178341
189.0921032	1.032540127
191.1077533	2.260930194
195.1026679	3.7674444023
197.1183179	0.7819638101
207.1026679	2.6577419207
209.1183179	0.6728633411
223.1339680	0.6078715643
255.2118244	0.8092410092
257.1910888	0.5184245152
269.1910888	0.7257021863
271.2067390	2.4713476557
273.2223890	20.668893606
281.1910888	0.9954383276
289.1809182	0.4908340215
299.2016537	33.03521585
301.1809182	0.8435963202
317.2122183	72.59172054
41.00328823	23.769035796
43.01893830	7.411585317
44.99820284	2.4868373052
55.01893830	3.314534264
59.01385291	22.201660181
NAME: 11,12-HepETE
PRECURSORMZ: 333.207133
PRECURSORTYPE: [M-H]-
FORMULA:
Ontology:
INCHIKEY:
SMILES: CCC=CCC=CC(O)C1OC1CC=CCC=CCCCC(=O)[O-]
RETENTIONTIME:
CCS:
IONMODE: Negative
COLLISIONENERGY: 30HCD
Comment:
Num Peaks: 46
107.0866239	2.8974885648
123.0815386	8.280822316
125.0971886	9.810737397
135.0815385	1.8125091443
137.0971886	5.406612452
139.1128387	3.007134698
149.0971886	1.2136378801
151.0764532	0.7229092876
153.0921032	2.0609435795
155.1077533	0.5049878636
161.0971886	2.131069532
163.1128387	8.8462576404
165.0921032	2.1309545478
165.1284886	5.3592590226
167.1077533	4.000792086
17.00328822	0.9677936979
177.0921032	1.743532919
179.1077533	2.999005053
181.1234034	0.8796724045
189.0921032	2.1154547249
191.1077533	11.847873106
193.1234034	5.579527448
195.1026679	0.8901148445
195.1390533	0.4314961976
207.1026679	12.124067849
209.1183179	12.238446711
221.1183179	3.6788550932
237.1132326	5.508832925
239.1288826	2.815687957
271.2067390	2.2313192281
287.2016537	1.5197573264
289.2173037	11.717757433
29.00328822	0.279790097
297.1860035	0.3949196025
315.1965683	22.5303550363
333.207133	55.32126605
41.00328823	26.0808511773
43.01893830	8.090212754
44.99820284	1.824993216
55.01893830	2.229243985
56.99820284	1.27751377
59.01385291	18.312594019
71.01385292	2.46898903
73.02950298	1.100616357
93.07097387	2.5543531391
95.08662393	20.058990855
NAME: 11,12-HepETrE
PRECURSORMZ: 335.2227831
PRECURSORTYPE: [M-H]-
FORMULA:
Ontology:
INCHIKEY:
SMILES: CCCCCC=CC1OC1C(O)CC=CCC=CCCCC(=O)[O-]
RETENTIONTIME:
CCS:
IONMODE: Negative
COLLISIONENERGY: 30HCD
Comment:
Num Peaks: 48
107.0866239	2.774169562
109.1022739	7.103362617
111.1179241	1.9941547782
113.1335741	2.23247953
121.1022739	0.4292527879
123.0815386	1.0906562
123.1179241	1.000224431
125.0971886	6.8638766905
127.1128387	0.9659305265
137.0971886	9.35247873
139.1128387	10.660104893
149.0971886	4.7127198251
151.1128387	5.3230983065
163.1128387	0.4925831506
165.0921032	2.914841187
165.1284886	3.2123706753
167.1077533	14.285902534
169.1234034	4.6628559562
17.00328822	1.601413507
179.1077533	4.2716524833
191.1077533	2.234162492
193.1234034	6.6537650511
195.1026679	2.0031773719
195.1390533	1.456235721
197.1183179	2.204076138
209.1183179	3.3497046629
221.1183179	3.694784957
225.1132326	1.7955371232
237.1132326	2.926303162
239.1288826	0.7630895754
273.2223890	4.469659381
289.2173037	1.7451641759
291.2329538	13.922300573
299.2016537	0.6512104789
317.2122183	30.752214813
319.1914828	1.049419583
335.2227831	67.02605884
41.00328823	15.7614713173
43.01893830	4.51294726
44.99820284	1.753776262
59.01385291	16.309850525
71.01385292	8.451352991
73.02950298	3.779967894
83.01385292	0.8878790833
83.08662393	1.059196671
85.02950298	1.741333362
95.08662393	1.188522721
97.10227394	11.912709438
NAME: 11,13-HepETE
PRECURSORMZ: 335.2227831
PRECURSORTYPE: [M-H]-
FORMULA:
Ontology:
INCHIKEY:
SMILES: CCCCCC=CC(O)C1OC1CC=CCC=CCCCC(=O)[O-]
RETENTIONTIME:
CCS:
IONMODE: Negative
COLLISIONENERGY: 30HCD
Comment:
Num Peaks: 46
109.1022739	2.9098259574
125.0971886	8.324178017
127.1128387	9.866613717
137.0971886	1.6535730143
139.1128387	5.429809264
141.1284886	3.104484994
149.0971886	0.4804989163
153.0921032	0.8674632698
155.1077533	1.7637459067
157.1234034	0.506835211
161.0971886	2.145266666
163.1128387	8.9167986159
165.0921032	0.8960096208
165.1284886	5.3965471109
167.1077533	4.728379258
169.1234034	0.3232296488
17.00328822	0.9719465326
177.0921032	1.870503159
179.1077533	2.742708472
189.0921032	2.1365040497
191.1077533	11.672085007
193.1234034	5.19720574
195.1026679	0.9017325456
195.1390533	1.7818697168
207.1026679	12.223037841
209.1183179	12.335461216
221.1183179	3.6942392456
237.1132326	5.541771207
239.1288826	2.833467271
273.2223890	2.235709449
289.2173037	1.5271166314
29.00328822	0.2803022969
291.2329538	11.78371138
299.2016537	0.3956425652
317.2122183	22.5518482325
335.2227831	55.73638876
41.00328823	26.3292972939
43.01893830	8.169453275
44.99820284	1.845947722
55.01893830	2.254331513
56.99820284	1.29189069
59.01385291	18.158475653
71.01385292	2.496848729
73.02950298	1.113090297
95.08662393	2.5719475422
97.10227394	20.042206781
NAME: 11,14-diHEPE
PRECURSORMZ: 333.207133
PRECURSORTYPE: [M-H]-
FORMULA:
Ontology:
INCHIKEY:
SMILES: CCC=CC=CC(O)C=CC(O)CC=CCC=CCCCC(=O)[O-]
RETENTIONTIME:
CCS:
IONMODE: Negative
COLLISIONENERGY: 30HCD
Comment:
Num Peaks: 47
107.0502384	1.448117676
109.0658885	5.1160923264
111.0815386	1.7293899571
119.0866239	2.1055521094
121.0658885	3.3873769681
123.0815386	5.4855860102
125.0971886	2.0037819866
135.0815385	1.372301904
137.0971886	5.779593944
149.0971886	5.8360900976
151.1128387	1.650033182
163.0764532	1.649539276
163.1128387	1.37662185
165.0921032	4.1986274294
167.1077533	6.254341457
177.0921032	2.005800759
179.1077533	4.2109001106
191.1077533	2.123154178
193.1234034	3.192137476
195.1026679	1.0465107276
197.1183179	0.2287220651
205.1234034	4.5528079905
207.1026679	0.7904317142
207.1390533	2.8813527976
209.1183179	1.5045365056
211.1339680	1.6587078153
223.1339680	2.544659458
235.1339680	3.1126664689
249.1496181	1.714892135
251.1288826	0.9197105017
253.1445327	0.1884268049
267.1601827	0.207736538
269.1910888	1.5492325604
271.2067390	15.792150414
285.1860035	1.377427614
287.2016537	4.1053708523
289.2173037	10.627180275
297.1860035	11.334729576
315.1965683	52.154106138
333.207133	61.69645185
41.00328823	10.4198396354
43.01893830	2.410304102
44.99820284	3.7762266353
59.01385291	29.723350512
79.05532376	0.1974678645
81.07097387	10.896067042
93.07097387	1.663894717
NAME: 11,oxoETE
PRECURSORMZ: 317.2122183
PRECURSORTYPE: [M-H]-
FORMULA:
Ontology:
INCHIKEY:
SMILES: CCCCCC=CC=CC(=O)CC=CCC=CCCCC(=O)[O-]
RETENTIONTIME:
CCS:
IONMODE: Negative
COLLISIONENERGY: 30HCD
Comment:
Num Peaks: 52
107.0866239	1.8410429018
109.1022739	2.2044744245
119.0866239	0.8748448182
121.1022739	6.69389727
123.1179241	21.794924597
135.0815385	1.3989525267
147.0815385	2.1921713146
147.1179241	1.391402894
149.0971886	12.06878608
151.0764532	0.1611724038
151.1128387	4.397818561
153.0921032	1.0572582328
157.0658885	0.6247881441
159.0815385	0.6247881441
161.0971886	6.050585904
163.1128387	11.6596240578
165.1284886	16.254982319
167.1077533	2.3014530364
169.1597889	0.6776260064
17.00328822	0.184888907
171.1754388	0.6247881441
175.0764532	0.6512021729
177.0921032	3.7105335931
177.1284886	0.845424899
179.1077533	0.2316611493
179.1441388	0.1674467922
189.0921032	1.117750614
191.1077533	1.8506376564
193.0870179	4.877520718
195.1026679	2.864534662
207.1026679	0.7681987266
209.1183179	0.9652388594
217.1597889	0.845424899
219.1754388	0.1674467922
235.1339680	0.1674467922
257.1910888	1.4663043807
269.1910888	1.90384781
271.2067390	3.1599171823
273.2223890	23.879299433
281.1910888	0.8515453735
289.1809182	0.2075806714
299.2016537	33.484427903
317.2122183	74.57495679
41.00328823	12.9864394038
43.01893830	1.90907557
43.05532376	0.9956833731
44.99820284	3.4141428889
57.07097387	0.9956833731
59.01385291	23.310113532
71.08662393	0.9956833731
83.08662393	1.387113146
85.10227394	0.1674467922
NAME: 12-HpEPE
PRECURSORMZ: 333.207133
PRECURSORTYPE: [M-H]-
FORMULA:
Ontology:
INCHIKEY:
SMILES: CC=CCCC=CCC(C=CC=CCC=CCCCC(=O)[O-])OO
RETENTIONTIME:
CCS:
IONMODE: Negative
COLLISIONENERGY: 30HCD
Comment:
Num Peaks: 44
107.0866239	4.6122346885
109.1022739	19.91889917
121.1022739	3.717030622
133.1022739	2.5571972285
135.1179241	4.9087071402
151.1128387	1.580988772
153.0921032	7.662419324
155.1077533	4.344488048
161.0971886	5.7868558296
163.1128387	2.679130139
165.0921032	1.600300115
167.1077533	2.6993101777
169.1234034	1.0872445927
177.0921032	2.4869502051
179.1077533	12.296233382
181.1234034	0.2943385908
191.1077533	2.655855131
193.1234034	1.825062486
207.1026679	4.9972476545
209.1183179	0.2459650628
221.1183179	2.23894826
223.0975824	3.905602261
225.1132326	2.2810431032
255.2118244	3.3551682325
257.2274745	1.4897368188
271.2067390	12.934948227
273.1860035	1.620768295
283.2067390	5.826519826
285.1860035	1.443099956
287.2016537	1.6637746949
289.2173037	13.575229756
297.1860035	3.9487282631
299.2016537	2.824216814
301.2173037	5.115272229
305.1758328	0.7993037007
307.1914828	0.3548391576
315.1965683	37.356460058
32.99820284	0.2373018799
333.207133	65.57205101
41.00328823	10.0958015424
43.01893830	1.378771372
44.99820284	3.442362463
59.01385291	29.347794842
81.07097387	1.235798884
NAME: 12-HpETE
PRECURSORMZ: 335.2227831
PRECURSORTYPE: [M-H]-
FORMULA:
Ontology:
INCHIKEY:
SMILES: CCCCCC=CCC(C=CC=CCC=CCCCC(=O)[O-])OO
RETENTIONTIME:
CCS:
IONMODE: Negative
COLLISIONENERGY: 30HCD
Comment:
Num Peaks: 44
109.1022739	4.7120657453
111.1179241	19.45857954
123.1179241	3.7823056833
133.1022739	2.607694711
135.1179241	4.3899185352
139.1128387	0.9957742215
153.1284886	1.629019824
155.1077533	7.459869037
157.1234034	4.395951216
161.0971886	5.8752223579
163.1128387	1.087617909
167.1077533	1.454020283
169.1234034	1.6269421541
171.1390533	1.0927642977
177.0921032	1.152600758
179.1077533	12.082331719
181.1234034	1.8883606087
191.1077533	1.079812992
193.1234034	1.360084513
207.1026679	5.0731007227
209.1183179	0.2459636456
221.1183179	2.306968376
223.0975824	3.926214236
225.1132326	2.2929673305
257.2274745	3.4031379633
259.2431245	1.4908376953
273.2223890	13.058487997
275.2016537	1.670339273
285.2223890	5.892973849
287.2016537	1.487717283
289.2173037	2.9408829348
291.2329538	13.693286331
299.2016537	4.0059109926
301.2173037	2.836059801
303.2329538	5.142598581
317.2122183	37.660264015
32.99820284	0.2377393819
335.2227831	66.03461802
41.00328823	10.3651268707
43.01893830	1.420658981
44.99820284	4.2188167914
59.01385291	30.118092608
83.08662393	1.233722496
95.08662393	1.112577729
NAME: 12-oxo-dodecatrienoic
PRECURSORMZ: 207.1026679
PRECURSORTYPE: [M-H]-
FORMULA:
Ontology:
INCHIKEY:
SMILES: O=CC=CC=CCC=CCCCC(=O)[O-]
RETENTIONTIME:
CCS:
IONMODE: Negative
COLLISIONENERGY: 30HCD
Comment:
Num Peaks: 41
101.0608031	0.3347041098
107.0502384	1.5332348232
109.0658885	1.5908551546
119.0866239	0.2101714872
121.0658885	0.86754305
123.0815386	0.6535646098
131.0866239	3.4384973682
133.1022739	6.8592733235
135.0815385	1.079556488
135.1179241	10.1840621244
139.0764532	0.1049213493
141.0921032	0.3347041098
145.1022739	2.1400300438
147.0815385	2.5800656088
157.0658885	0.2964704407
159.0815385	5.4847924624
161.0971886	12.444656727
163.0764532	0.3419024436
163.1128387	20.67496557
165.0921032	0.6397695169
17.00328822	0.187132788
171.0815385	2.0973335568
175.0764532	1.4589454273
177.0921032	3.1401300888
179.1077533	18.289883451
189.0921032	44.730229152
207.1026679	78.72424828
29.00328822	3.2349408288
41.00328823	23.7666029924
43.01893830	7.4297134218
44.99820284	5.1592860904
45.03458836	1.5138789029
55.01893830	1.845453557
59.01385291	30.053096384
61.02950297	0.959016643
67.01893830	1.3809365782
69.03458836	1.5908551546
81.03458836	0.8103529683
83.05023841	0.6535646098
95.05023841	1.079556488
99.04515304	0.1011018313
NAME: 12-oxoETE
PRECURSORMZ: 317.2122183
PRECURSORTYPE: [M-H]-
FORMULA:
Ontology:
INCHIKEY:
SMILES: CCCCCC=CCC(=O)C=CC=CCC=CCCCC(=O)[O-]
RETENTIONTIME:
CCS:
IONMODE: Negative
COLLISIONENERGY: 30HCD
Comment:
Num Peaks: 42
111.1179241	7.510566602
133.1022739	4.010484245
135.1179241	5.839000149
137.0971886	9.413315368
139.1128387	5.930122848
149.0971886	2.5173941287
151.1128387	3.3663630862
153.1284886	1.5429743237
161.0971886	8.306995061
163.1128387	3.9273809859
17.00328822	0.186288735
173.0971886	1.400973453
175.1128387	6.833087004
177.0921032	1.1881795297
177.1284886	6.0220362226
179.1077533	9.309735958
179.1441388	0.1687145626
189.0921032	1.8272008195
201.0921032	2.16738017
203.1077533	7.5477950992
205.0870179	2.3773459656
205.1234034	2.0410662119
207.1026679	0.6338288064
217.0870179	2.379642246
219.1026679	4.2737822148
221.1183179	6.290552379
225.1496181	0.7017111764
257.1910888	1.6805140657
269.1910888	1.24196162
271.2067390	3.3234173252
273.2223890	21.270250382
281.1910888	0.7870391651
289.1809182	0.2091523029
299.2016537	32.74184918
317.2122183	75.79810294
41.00328823	11.8721905113
43.01893830	2.520349867
44.99820284	4.7923415183
59.01385291	30.92167153
85.10227394	0.1687145626
95.08662393	1.101788036
97.10227394	3.8567396368
NAME: 12,13-diHEPE
PRECURSORMZ: 333.207133
PRECURSORTYPE: [M-H]-
FORMULA:
Ontology:
INCHIKEY:
SMILES: CC=CCCC=CC(O)C(O)C=CC=CCC=CCCCC(=O)[O-]
RETENTIONTIME:
CCS:
IONMODE: Negative
COLLISIONENERGY: 30HCD
Comment:
Num Peaks: 45
107.0866239	4.1816153907
123.0815386	10.795725053
125.0971886	12.869604133
133.1022739	1.412219165
135.0815385	1.550268725
135.1179241	2.0569121693
137.0971886	3.0398062892
151.0764532	0.7528172172
153.0921032	11.637449038
155.1077533	5.391098793
161.0971886	6.498582783
163.1128387	5.9202586651
165.1284886	2.1636064323
167.1077533	0.3028195313
169.1234034	0.2928364814
177.0921032	1.2048009386
179.1077533	11.869708849
189.0921032	1.256089482
191.1077533	8.4704166379
193.1234034	6.2909406845
195.1390533	0.4678100551
207.1026679	6.627726113
209.1183179	7.405091153
219.1026679	2.7069614256
221.1183179	5.791900327
235.0975824	0.7191905363
237.1132326	6.831710888
239.1288826	2.91963078
271.2067390	0.405511558
287.2016537	1.4981835673
289.2173037	12.500326591
29.00328822	2.252227322
307.1914828	0.3738727825
315.1965683	22.592689891
317.1758328	1.079673614
333.207133	57.8332207
41.00328823	7.2064540538
43.01893830	1.645511335
44.99820284	2.391987295
59.01385291	25.665976537
61.02950297	2.256221646
71.01385292	2.56432939
81.07097387	1.330812548
93.07097387	3.8135832904
95.08662393	23.161820146
NAME: 12,13-diHETE
PRECURSORMZ: 335.2227831
PRECURSORTYPE: [M-H]-
FORMULA:
Ontology:
INCHIKEY:
SMILES: CCCCCC=CC(O)C(O)C=CC=CCC=CCCCC(=O)[O-]
RETENTIONTIME:
CCS:
IONMODE: Negative
COLLISIONENERGY: 30HCD
Comment:
Num Peaks: 43
109.1022739	4.2029477151
125.0971886	10.861347948
127.1128387	12.944916458
133.1022739	1.692417766
135.1179241	2.0554034695
137.0971886	1.567543993
139.1128387	3.0580770265
153.0921032	0.795522939
155.1077533	11.156984098
157.1234034	5.418527245
161.0971886	6.513175006
163.1128387	5.9287969874
165.1284886	2.144960596
171.1390533	0.2934297648
177.0921032	1.208559066
179.1077533	11.68781394
189.0921032	1.270086593
191.1077533	8.0333516977
193.1234034	5.8809113819
195.1390533	1.7519968023
207.1026679	6.666815034
209.1183179	7.430777024
219.1026679	2.7289008747
221.1183179	5.822668419
223.1339680	0.2895562865
235.0975824	0.7211514807
237.1132326	6.869183856
239.1288826	2.934714955
273.2223890	0.4054896908
289.2173037	1.5029621196
29.00328822	2.271233996
291.2329538	12.552117131
317.2122183	22.693739727
335.2227831	58.2256974
41.00328823	7.5126113377
43.01893830	1.66384793
44.99820284	2.418432877
59.01385291	25.870093773
61.02950297	2.281308529
71.01385292	2.592867483
83.08662393	1.345553781
95.08662393	3.8410553103
97.10227394	22.892450497
NAME: 12,13-HepETE
PRECURSORMZ: 333.207133
PRECURSORTYPE: [M-H]-
FORMULA:
Ontology:
INCHIKEY:
SMILES: CC=CCCCC1OC1C(O)C=CC=CCC=CCCCC(=O)[O-]
RETENTIONTIME:
CCS:
IONMODE: Negative
COLLISIONENERGY: 30HCD
Comment:
Num Peaks: 53
107.0502384	1.00350572
107.0866239	1.23093198
109.0658885	2.103136536
111.0815386	2.690092345
121.0658885	1.072917311
123.0815386	19.100477836
125.0971886	23.103900908
133.1022739	1.402867151
135.1179241	1.9873577457
137.0971886	0.5904519801
153.0921032	8.638289423
155.1077533	4.016481152
161.0971886	5.2840421939
163.1128387	3.6642716366
165.0921032	0.8610746469
165.1284886	0.5617223355
17.00328822	1.188848873
177.0921032	1.1662970779
177.1284886	2.458259582
179.1077533	11.193631369
191.1077533	5.834882018
193.1234034	1.3343680906
203.1077533	1.209597364
205.1234034	3.4215059687
207.1026679	6.1876407395
209.1183179	6.4810680499
219.1026679	1.9192686129
221.1183179	3.9759790792
223.1339680	2.347623323
233.1183179	0.8782629551
237.1132326	0.7462737421
239.1288826	0.4412738433
249.1132326	0.3772870247
271.2067390	1.386998855
287.2016537	1.3471600473
289.2173037	11.272142099
297.1860035	0.4044903942
307.1914828	0.3619263951
315.1965683	22.0447726291
333.207133	55.92107894
41.00328823	34.2170451852
43.01893830	11.374525852
44.99820284	1.041603988
55.01893830	2.913456492
56.99820284	0.7395798753
57.03458836	0.9474251735
59.01385291	11.64075199
71.01385292	2.958565582
73.02950298	1.327372285
81.07097387	1.179388919
83.08662393	5.181297305
93.07097387	1.855177349
95.08662393	3.411652034
NAME: 12,14-diHEPE
PRECURSORMZ: 333.207133
PRECURSORTYPE: [M-H]-
FORMULA:
Ontology:
INCHIKEY:
SMILES: CCC=CC=CC(O)CC(O)C=CC=CCC=CCCCC(=O)[O-]
RETENTIONTIME:
CCS:
IONMODE: Negative
COLLISIONENERGY: 30HCD
Comment:
Num Peaks: 47
105.0709739	2.682851204
107.0502384	2.39475834
107.0866239	16.22552787
109.0658885	10.1183623551
109.1022739	0.255339876
111.0815386	3.8115676982
121.0658885	2.9150146474
123.0815386	9.101599991
125.0971886	21.81834985
153.0921032	0.2662344344
161.0971886	1.0866450066
163.1128387	2.76968554
167.1077533	0.2372537125
169.1234034	0.2550280263
175.1128387	1.138655402
177.1284886	5.8764512018
179.1077533	4.524746603
179.1441388	5.6609620086
191.1077533	4.4624945159
193.1234034	1.1604690125
203.1077533	3.5187795793
205.0870179	1.052258048
205.1234034	17.921655946
207.1026679	6.0343922406
207.1390533	5.2278929019
209.1183179	1.8440936229
219.1026679	0.6941428595
221.1183179	5.221976076
223.1339680	12.600510568
235.1339680	1.240284297
269.1910888	0.3331279496
271.2067390	8.699809177
287.2016537	0.3462931083
289.2173037	6.906125056
297.1860035	7.25270549
315.1965683	31.52801932
333.207133	45.442982605
41.00328823	4.3369993817
43.01893830	2.173128642
44.99820284	2.151291184
45.03458836	1.078401197
57.03458836	5.020883718
59.01385291	18.814059762
67.05532376	1.046411603
79.05532376	1.147766682
81.07097387	8.710693774
93.07097387	2.893317908
NAME: 12,14-HepETE
PRECURSORMZ: 333.207133
PRECURSORTYPE: [M-H]-
FORMULA:
Ontology:
INCHIKEY:
SMILES: CC=CCCCC(O)C1OC1C=CC=CCC=CCCCC(=O)[O-]
RETENTIONTIME:
CCS:
IONMODE: Negative
COLLISIONENERGY: 30HCD
Comment:
Num Peaks: 47
111.0815386	2.6503400767
113.0971886	4.6549223989
125.0971886	4.8347896421
127.1128387	0.4469450741
141.0921032	2.7298428448
145.1022739	0.5232879101
153.0921032	6.725738125
155.1077533	2.6462559813
161.0971886	1.9433546836
163.1128387	1.098172294
167.1077533	1.095013131
17.00328822	1.349719829
173.0971886	0.9340899236
175.1128387	5.6802489813
177.1284886	1.045726422
179.1077533	5.748580693
189.0921032	2.802024194
191.1077533	5.827533367
193.1234034	2.2897721842
195.1390533	1.6444480939
203.1077533	6.132673956
205.1234034	5.48370436
207.1026679	4.0280419619
207.1390533	1.444698525
219.1026679	6.451463881
221.1183179	6.350248543
231.1026679	2.085675412
233.1183179	5.044458083
249.1132326	4.804881177
251.1288826	1.8544403211
271.2067390	4.93954568
287.2016537	2.0442685053
289.2173037	14.74901464
297.1860035	2.4133552794
315.1965683	31.962638704
317.1758328	1.083186486
333.207133	67.39004223
41.00328823	14.8704265055
43.01893830	4.032674732
44.99820284	2.374910259
59.01385291	24.572751301
71.01385292	7.000003053
73.02950298	3.383998011
83.01385292	2.432585292
83.08662393	12.314577242
85.02950298	1.760957258
95.08662393	2.323972756
NAME: 13-hydroxy-tridecatrienoic
PRECURSORMZ: 223.1339680
PRECURSORTYPE: [M-H]-
FORMULA:
Ontology:
INCHIKEY:
SMILES: O=C([O-])CCCC=CCC=CCC=CCO
RETENTIONTIME:
CCS:
IONMODE: Negative
COLLISIONENERGY: 30HCD
Comment:
Num Peaks: 42
109.0658885	1.122174372
121.0658885	0.844943761
123.0815386	2.4036471443
125.0971886	0.4634049621
135.0815385	1.122174372
145.1022739	0.3154822443
147.1179241	5.3393880779
149.0971886	1.122174372
149.1335741	7.200429563
151.1492241	0.1289391829
159.1179241	1.9185851349
161.0971886	1.4189102907
161.1335741	11.988328323
163.1128387	1.8183354046
17.00328822	0.6671622913
173.0971886	1.7032294241
175.1128387	11.712808232
177.0921032	0.3369569659
177.1284886	3.660414458
179.1077533	0.6415381665
179.1441388	18.284245721
181.1234034	0.5775566867
187.1128387	5.1845605007
191.1077533	2.0819572164
193.1234034	16.1689605099
195.1390533	1.6541019971
205.1234034	51.300661742
223.1339680	72.99972807
29.00328822	2.7098715452
31.01893829	0.1939683995
41.00328823	16.239561438
43.01893830	11.0803512803
44.99820284	4.9255111961
45.03458836	4.755272707
55.01893830	1.363235094
59.01385291	28.173955775
61.02950297	0.9056609557
69.03458836	1.122174372
81.03458836	0.844943761
83.05023841	1.9575061412
85.06588849	0.4250137738
95.05023841	1.122174372
NAME: 13,14-diHEPE
PRECURSORMZ: 333.207133
PRECURSORTYPE: [M-H]-
FORMULA:
Ontology:
INCHIKEY:
SMILES: CCC=CC=CC(O)C(O)C=CCC=CCC=CCCCC(=O)[O-]
RETENTIONTIME:
CCS:
IONMODE: Negative
COLLISIONENERGY: 30HCD
Comment:
Num Peaks: 44
109.0658885	10.763241344
111.0815386	12.833904863
121.0658885	1.545976492
123.0815386	3.0303305938
137.0608030	0.7564060437
139.0764532	11.889715123
141.0921032	6.054547393
147.1179241	1.686666406
149.1335741	2.0485968736
155.1077533	0.2927891237
175.1128387	6.486076773
177.1284886	5.9418126122
179.1077533	1.081427425
179.1441388	2.1558021845
191.1077533	1.313329382
193.1234034	12.28070589
203.1077533	1.296939177
205.1234034	8.469768607
207.1390533	5.9891763882
209.1547035	0.3162354433
221.1183179	6.651506895
223.1339680	7.387802196
233.1183179	2.6980316276
235.1339680	5.775565138
237.1496181	0.2894142927
249.1132326	0.716524391
251.1288826	6.817462461
253.1445327	2.917445516
271.2067390	0.4052908451
287.2016537	1.4948823569
289.2173037	12.487588746
29.00328822	2.256005433
315.1965683	22.559987145
333.207133	57.85419796
41.00328823	7.1970729719
43.01893830	1.409630964
44.99820284	2.39464699
59.01385291	25.150707053
61.02950297	2.249908785
67.05532376	1.327021777
71.01385292	2.557184858
79.05532376	3.8022426479
81.07097387	23.19951376
93.07097387	4.1669170491
NAME: 13,14-diHETE
PRECURSORMZ: 335.2227831
PRECURSORTYPE: [M-H]-
FORMULA:
Ontology:
INCHIKEY:
SMILES: CCCCC=CC(O)C(O)C=CCC=CCC=CCCCC(=O)[O-]
RETENTIONTIME:
CCS:
IONMODE: Negative
COLLISIONENERGY: 30HCD
Comment:
Num Peaks: 43
111.0815386	10.813219329
113.0971886	12.84674263
123.0815386	1.558641936
125.0971886	3.0440436336
139.0764532	0.8459163028
141.0921032	11.789467124
143.1077533	5.400825829
147.1179241	1.686460956
149.1335741	2.0483059116
157.1234034	0.2930502063
175.1128387	6.502442312
177.1284886	5.9674389012
179.1441388	2.1664337681
191.1077533	1.2045510882
193.1234034	11.887333012
203.1077533	1.307564378
205.1234034	8.2718279604
207.1390533	5.8822586518
209.1547035	1.5134231889
221.1183179	6.681410095
223.1339680	7.422967535
233.1183179	2.7145736746
235.1339680	5.798152139
237.1496181	0.2891834129
249.1132326	0.7182742306
251.1288826	6.845240015
253.1445327	2.927683462
273.2223890	0.4049675249
289.2173037	1.4984192157
29.00328822	2.262062445
291.2329538	12.522248268
317.2122183	22.63040135
335.2227831	58.12069605
41.00328823	7.2326574637
43.01893830	1.409918905
44.99820284	2.41423787
59.01385291	25.832521083
61.02950297	2.268334017
69.07097387	1.331157403
71.01385292	2.578129785
81.07097387	3.8119546603
83.08662393	23.126390571
95.08662393	4.128471712
NAME: 13,14-EpETE
PRECURSORMZ: 317.2122183
PRECURSORTYPE: [M-H]-
FORMULA:
Ontology:
INCHIKEY:
SMILES: CCC=CCCC1OC1C=CCC=CCC=CCCCC(=O)[O-]
RETENTIONTIME:
CCS:
IONMODE: Negative
COLLISIONENERGY: 30HCD
Comment:
Num Peaks: 48
107.0866239	0.2850157183
111.0815386	5.0150247965
123.0815386	9.169854795
125.0971886	4.996974954
137.0971886	2.1334700573
139.1128387	1.4906719567
147.1179241	0.2165703723
149.1335741	1.2199188885
161.1335741	0.8573448193
17.00328822	0.9292300136
175.1128387	3.804022745
177.1284886	4.1521563598
187.1128387	1.9751498039
189.1284886	6.429042238
191.1077533	1.5373056166
191.1441388	2.303134124
193.1234034	5.975402935
203.1077533	5.1505411299
205.1234034	5.9229653712
207.1390533	1.9917179515
215.1077533	1.457945047
217.0870179	0.2010191996
217.1234034	3.132130357
219.1026679	0.2908908247
219.1390533	0.8363442648
221.1183179	5.4247551968
223.1339680	0.8367032989
231.1390533	0.961742039
233.1183179	3.1811723818
235.1339680	0.9423962801
255.2118244	2.8881818363
269.1910888	1.5573402311
271.2067390	2.4360183904
273.2223890	19.48621724
281.1910888	1.8894965027
289.1809182	0.203618552
299.2016537	38.727765548
301.1809182	1.07929736
317.2122183	75.45150875
41.00328823	21.0688510825
43.01893830	4.890002288
44.99820284	3.4184886127
55.01893830	2.886699478
59.01385291	27.105833769
83.08662393	6.171265426
93.07097387	1.295628339
95.08662393	5.7212312073
97.10227394	0.9019418499
NAME: 13,14-HepETE
PRECURSORMZ: 333.207133
PRECURSORTYPE: [M-H]-
FORMULA:
Ontology:
INCHIKEY:
SMILES: CCC=CCC1OC1C(O)C=CCC=CCC=CCCCC(=O)[O-]
RETENTIONTIME:
CCS:
IONMODE: Negative
COLLISIONENERGY: 30HCD
Comment:
Num Peaks: 54
103.0189383	0.7980803485
107.0502384	1.075967467
109.0658885	19.032378984
111.0815386	22.943560876
123.0815386	0.589219817
139.0764532	8.829789393
141.0921032	4.365779044
147.1179241	1.398204029
149.1335741	1.9811873848
155.1077533	0.2766148302
17.00328822	1.176744305
175.1128387	5.2734775678
177.1284886	3.6577314452
179.1441388	0.5605501259
191.1077533	1.2768865281
191.1441388	2.450088341
193.1234034	11.488482621
205.1234034	5.831302154
207.1390533	0.5975453063
217.1234034	1.205576669
219.1390533	3.4162986905
221.1183179	6.1826743784
223.1339680	6.4769301296
233.1183179	1.9205690056
235.1339680	3.9706454287
237.1496181	2.344097729
247.1339680	0.8807688369
251.1288826	0.7450506963
253.1445327	0.440566541
263.1288827	0.376679999
271.2067390	1.384104447
287.2016537	1.3452674706
289.2173037	11.260302601
297.1860035	0.4036462983
315.1965683	22.0178787031
333.207133	55.89772511
41.00328823	33.7157661913
41.03967373	0.7965234389
43.01893830	11.287665182
44.99820284	1.044572584
55.01893830	2.935120134
56.99820284	0.7416900631
57.03458836	0.9586301814
59.01385291	11.653028161
67.05532376	1.189844989
69.07097387	5.185211553
71.01385292	2.967006442
73.02950298	1.331158874
79.05532376	1.868485564
81.07097387	3.406481057
93.03458836	1.014714667
93.07097387	1.225126574
95.05023841	2.11304277
97.06588849	2.6935582689
NAME: 13,14-HepETrE
PRECURSORMZ: 335.2227831
PRECURSORTYPE: [M-H]-
FORMULA:
Ontology:
INCHIKEY:
SMILES: CCCCCC1OC1C(O)C=CCC=CCC=CCCCC(=O)[O-]
RETENTIONTIME:
CCS:
IONMODE: Negative
COLLISIONENERGY: 30HCD
Comment:
Num Peaks: 54
109.0658885	1.077106473
111.0815386	19.810557197
113.0971886	23.177107972
125.0971886	0.5889423429
139.0764532	0.8194879585
141.0921032	8.851159497
143.1077533	4.031908448
147.1179241	1.416919506
149.1335741	2.0115928748
153.0921032	0.6729705766
157.1234034	0.2729750757
17.00328822	1.17858804
175.1128387	4.8963280015
177.1284886	3.6968587501
179.1441388	0.5618911268
191.1077533	1.1678703783
191.1441388	2.518322564
193.1234034	11.164650521
205.1234034	5.596039786
207.1390533	0.5650666426
217.1234034	1.204927344
219.1390533	3.1970485079
221.1183179	6.219876419
223.1339680	6.6042225473
233.1183179	1.950663872
235.1339680	4.6313583301
237.1496181	2.351260806
247.1339680	0.9036956469
251.1288826	0.7463437714
253.1445327	0.4414092662
263.1288827	0.3773892862
273.2223890	1.390666863
289.2173037	0.5518994944
291.2329538	11.447596609
299.2016537	0.403456214
317.2122183	22.0534646186
335.2227831	56.23374351
41.00328823	33.1628039157
43.01893830	11.198785107
44.99820284	1.072679252
55.01893830	2.855229494
56.99820284	0.7609965899
57.03458836	0.9835837572
59.01385291	11.850036039
69.07097387	1.220976783
71.01385292	2.958542312
71.08662393	5.254020491
73.02950298	1.350935306
81.07097387	1.917250721
83.08662393	3.451956609
95.05023841	1.041441668
95.08662393	1.22454964
97.06588849	2.168736534
99.08153855	2.7421089307
NAME: 13,15-HepETE
PRECURSORMZ: 333.207133
PRECURSORTYPE: [M-H]-
FORMULA:
Ontology:
INCHIKEY:
SMILES: CCC=CCC(O)C1OC1C=CCC=CCC=CCCCC(=O)[O-]
RETENTIONTIME:
CCS:
IONMODE: Negative
COLLISIONENERGY: 30HCD
Comment:
Num Peaks: 46
111.0815386	4.8346105862
113.0971886	0.4466525248
127.0764532	2.3144115967
139.0764532	7.031530973
141.0921032	4.290326576
153.0921032	0.8879641669
159.1179241	0.522702327
17.00328822	1.34993264
175.1128387	1.9428015466
177.1284886	1.098506051
179.1077533	1.088436022
187.1128387	0.9330446342
189.1284886	5.6763748579
193.1234034	6.207654147
203.1077533	2.80287322
205.1234034	5.853882358
207.1390533	2.0565323111
217.1234034	6.131998586
219.1390533	5.8884835066
221.1183179	4.0421338218
221.1547035	1.445135972
233.1183179	6.472603893
235.1339680	6.369030949
245.1183179	2.110261125
247.1339680	5.042327303
263.1288827	4.8268259004
265.1445327	1.8582899954
271.2067390	4.930527884
287.2016537	2.0445255278
289.2173037	14.761242695
297.1860035	2.4089672402
315.1965683	31.981914617
317.1758328	1.083511073
333.207133	67.49925695
41.00328823	15.1009037693
43.01893830	4.038565915
[truncated: 5,721 more rows]
