# Supplementary material for: Viral Infection Leads to a Unique Suite of Allelopathic Chemical Signals in Three Diatom Host–Virus Pairs
Source: Mar Drugs. 2024 May 17;22(5):228. doi: 10.3390/md22050228 (PMC11123003; doi:10.3390/md22050228)
Supplement: Supplementary file 1 [file marinedrugs-22-00228-s001.zip › Supplemental File S1b C20_3_CFMID.msp]

NAME: 10,11-diHETrE_111417
PRECURSORMZ: 337.2384331
PRECURSORTYPE: [M-H]-
FORMULA:
Ontology:
INCHIKEY:
SMILES: CCC=CCC=CC=CC(O)C(O)CCCCCCCCC(=O)[O-]
RETENTIONTIME:
CCS:
IONMODE: Negative
COLLISIONENERGY: 30HCD
Comment:
Num Peaks: 46
111.1179241	0.6691053536
113.1335741	0.8798510634
119.0866239	0.9003257276
121.1022739	12.724970602
131.0866239	1.143098935
133.1022739	5.1178064817
139.1128387	3.5809740157
141.1284886	4.0979645018
143.1441388	3.1382449816
147.0815385	1.016597761
149.0971886	12.722405433
151.1128387	10.91610724
155.1077533	0.1925142186
157.1234034	6.105385073
161.0971886	2.399995191
163.1128387	4.191023497
167.1077533	2.1093163864
169.1234034	7.5216606351
171.1390533	6.3097366052
179.1077533	8.1853196908
181.1234034	3.9427099296
185.1183179	8.445392674
185.1547035	0.6525473294
187.1339680	6.593431933
197.1183179	2.787879255
199.1339680	5.7924822846
215.1288826	4.3067439005
217.1445327	1.6169105234
229.1445327	0.2047569066
231.1601828	0.2536920281
275.2380392	6.391594893
291.2329538	1.6852338235
293.2486038	12.657361724
301.2173037	4.241492322
309.207133	0.1985949916
319.2278683	31.42775039
321.207133	0.9615399337
337.2384331	65.14902195
41.00328823	6.2970592143
43.01893830	1.795650082
44.99820284	2.096981726
56.99820284	2.028831616
59.01385291	29.172265549
61.02950297	4.47919972
71.01385292 1.626908188
73.02950298	1.271563711

NAME: 10,11-diHETrE_5711
PRECURSORMZ: 337.2384331
PRECURSORTYPE: [M-H]-
FORMULA:
Ontology:
INCHIKEY:
SMILES: CCCCCCCC=CC(O)C(O)C=CCC=CCCCC(=O)[O-]
RETENTIONTIME:
CCS:
IONMODE: Negative
COLLISIONENERGY: 30HCD
Comment:
Num Peaks: 43
107.0866239	1.6926265967
109.1022739	3.8821146062
111.1179241	1.339836601
123.1179241	3.8329266073
125.1335741	22.352471948
135.0815385	6.492810548
137.0971886	6.2850695705
137.1335741	4.194122449
139.1128387	2.6510412721
151.0764532	1.2776617382
153.0921032	11.483295979
153.1284886	10.84735853
155.1441388	12.932227315
163.0764532	1.225028021
165.0921032	8.0151296225
165.1284886	1.560675721
167.1077533	5.749516848
167.1441388	3.0504566092
169.1234034	0.3161598494
181.0870179	6.602161822
181.1234034	0.6864349572
183.1026679	7.429923807
183.1390533	11.151276542
185.1547035	5.418059071
193.0870179	2.7201357279
195.1026679	5.809333654
197.1183179	0.2893451103
199.1703536	0.2935136487
209.0819324	0.7219113179
211.0975824	6.873766358
213.1132326	2.93869596
275.2380392	0.4051939631
29.00328822	2.252360602
291.2329538	1.5043708993
293.2486038	12.565324664
319.2278683	22.708703759
337.2384331	58.34502275
41.00328823	7.4740964453
43.01893830	1.648472248
44.99820284	2.399764441
59.01385291	25.728596126
61.02950297	2.271423901
71.01385292 2.58158179

NAME: 10,11-HepEDE_111417
PRECURSORMZ: 337.2384331
PRECURSORTYPE: [M-H]-
FORMULA:
Ontology:
INCHIKEY:
SMILES: CCC=CCC=CCC1OC1C(O)CCCCCCCCC(=O)[O-]
RETENTIONTIME:
CCS:
IONMODE: Negative
COLLISIONENERGY: 30HCD
Comment:
Num Peaks: 51
109.1022739	6.435493887
113.1335741	0.9413878508
119.0866239	1.497878005
121.1022739	3.7123386116
133.1022739	0.625078535
135.0815385	1.436984422
137.0971886	5.079654591
139.1128387	4.0086585012
141.1284886	1.7405346864
143.1441388	0.938880905
149.0971886	8.559614953
151.1128387	10.030796867
155.1441388	3.20395043
157.1234034	4.847360914
161.0971886	0.9490485434
163.1128387	2.5370767691
169.1234034	3.8858855615
171.1390533	0.2342023313
179.1077533	8.113235617
181.1234034	6.7333430916
183.1390533	7.140333353
185.1183179	1.9251048702
185.1547035	1.8280708089
187.1339680	2.2140107357
197.1183179	3.0720738661
199.1339680	6.0816914645
201.1496181	2.892568046
203.1652682	0.7146777514
209.1183179	0.9673042117
211.1339680	2.806789534
215.1288826	0.8658267764
217.1445327	0.4742767929
227.1288826	1.5384887903
229.1445327	0.2873493997
241.1445327	1.017283205
275.2380392	5.401965155
291.2329538	1.7465848588
293.2486038	13.751325238
301.2173037	2.825394152
309.207133	0.2052884984
319.2278683	33.35644243
337.2384331	69.23296052
41.00328823	17.502499699
43.01893830	5.726309896
44.99820284	1.775110644
56.99820284	3.70146266
59.01385291	17.820538394
68.99820284	0.9787092437
71.01385292 9.846248175
73.02950298	4.902891108
85.02950298	1.889014648

NAME: 10,11-HepEDE_5711
PRECURSORMZ: 337.2384331
PRECURSORTYPE: [M-H]-
FORMULA:
Ontology:
INCHIKEY:
SMILES: CCCCCCCCC1OC1C(O)C=CCC=CCCCC(=O)[O-]
RETENTIONTIME:
CCS:
IONMODE: Negative
COLLISIONENERGY: 30HCD
Comment:
Num Peaks: 52
107.0866239	1.3892919
109.1022739	1.9826413551
111.1179241	1.181433086
113.1335741	5.225895409
123.1179241	1.882800356
125.1335741	3.406146948
135.0815385	5.223523902
137.0971886	4.675195624
137.1335741	1.218966472
139.1128387	3.9988937794
141.1284886	2.7702646967
151.0764532	1.1511072359
151.1128387	4.072993414
153.0921032	10.772510588
153.1284886	19.490151672
155.1441388	22.925063833
165.0921032	5.568571512
167.1077533	0.5445296956
167.1441388	0.5873748662
17.00328822	1.149544647
177.0921032	1.687974456
179.1077533	3.86106893
181.0870179	6.087410779
181.1234034	0.7843024308
183.1026679	6.5712145211
183.1390533	8.261667827
185.1547035	3.993553408
193.0870179	1.9556196491
195.1026679	4.5754946982
197.1183179	2.307819957
199.1703536	0.272524319
207.1026679	0.9209390989
209.0819324	0.6151019482
211.0975824	0.7451830757
213.1132326	0.4407619378
223.0975824	0.3768302139
225.1132326	0.261815746
275.2380392	1.386965588
291.2329538	0.5509660516
293.2486038	11.350264919
301.2173037	0.4023824107
319.2278683	22.4647716582
337.2384331	56.04519262
41.00328823	32.4991719077
43.01893830	10.73529915
44.99820284	1.093246166
55.01893830	2.63290442
56.99820284	0.7755171956
57.03458836	0.9269933394
59.01385291	11.897081466
71.01385292 2.910970775
73.02950298	1.39208833

NAME: 11,13-HepEDE_111417
PRECURSORMZ: 337.2384331
PRECURSORTYPE: [M-H]-
FORMULA:
Ontology:
INCHIKEY:
SMILES: CC=CCCC=CC(O)C1OC1CCCCCCCCCC(=O)[O-]
RETENTIONTIME:
CCS:
IONMODE: Negative
COLLISIONENERGY: 30HCD
Comment:
Num Peaks: 48
107.0866239	2.913838942
123.0815386	8.331376103
125.0971886	10.136654424
135.0815385	1.6649824798
137.0971886	5.408608004
139.1128387	3.101615865
153.0921032	1.7803701726
153.1284886	0.4655043321
155.1077533	0.5178572314
165.0921032	1.3804464605
165.1284886	2.158475195
167.1077533	0.3229891503
167.1441388	9.0036485732
169.1234034	0.6430418712
169.1597889	5.1140174236
17.00328822	0.9684763707
171.1390533	2.8959654702
181.1234034	2.7891968426
183.1390533	2.646641209
193.1234034	2.3634265355
195.1390533	12.125928372
197.1547035	4.9422701011
199.1339680	0.9188495964
199.1703536	0.2852316177
209.1183179	0.6396440546
211.1339680	12.456312462
213.1496181	12.374245029
225.1496181	3.7001064908
239.1288826	0.7172342231
241.1445327	5.531708112
243.1601828	2.830561025
275.2380392	2.2263583595
291.2329538	1.5234910177
293.2486038	11.758244562
301.2173037	0.3948220366
311.2227831	0.3577043137
319.2278683	22.47134737
337.2384331	55.76360586
41.00328823	25.9918848642
43.01893830	8.282644949
44.99820284	1.878303823
55.01893830	2.293368607
56.99820284	1.069080718
59.01385291	18.38174114
71.01385292 2.540154938
73.02950298	1.132447508
93.07097387	2.5836815617
95.08662393	20.221894647

NAME: 11,13-HepEDE_5711
PRECURSORMZ: 337.2384331
PRECURSORTYPE: [M-H]-
FORMULA:
Ontology:
INCHIKEY:
SMILES: CCCCCCCC(O)C1OC1CC=CCC=CCCCC(=O)[O-]
RETENTIONTIME:
CCS:
IONMODE: Negative
COLLISIONENERGY: 30HCD
Comment:
Num Peaks: 45
111.1179241	2.3333200975
123.1179241	1.14936194
127.1128387	4.413334783
129.1284886	4.897081137
139.1128387	2.836071318
141.1284886	8.6908896339
143.1441388	3.925262192
149.0971886	0.5193999281
151.1128387	1.6092178609
157.1234034	3.005849265
159.1390533	0.5627673013
163.1128387	4.5490679413
165.0921032	0.2080267646
165.1284886	1.088958319
167.1077533	4.0426055306
169.1234034	4.7915118382
171.1390533	1.6944095718
177.0921032	1.882719912
179.1077533	3.1505208621
191.1077533	5.388433871
193.1234034	4.5569618618
195.1026679	2.6997370465
207.1026679	5.314367389
209.1183179	5.913382176
219.1026679	1.699441019
221.1183179	4.7172366385
223.1339680	0.7818466762
237.1132326	4.5256777969
239.1288826	1.7992879321
275.2380392	5.82378865
291.2329538	2.0248162677
293.2486038	14.506767473
301.2173037	3.206246105
319.2278683	34.49419539
337.2384331	69.54998153
41.00328823	17.59886546
43.01893830	4.913721117
44.99820284	2.079351414
55.01893830	1.282193311
56.99820284	4.42566258
59.01385291	20.497671737
71.01385292 8.093335916
73.02950298	4.218947811
85.02950298	1.96209109
99.117924060000007	12.575615553

NAME: 11-HpETrE_111417
PRECURSORMZ: 337.2384331
PRECURSORTYPE: [M-H]-
FORMULA:
Ontology:
INCHIKEY:
SMILES: CCC=CCC=CC=CC(CCCCCCCCCC(=O)[O-])OO
RETENTIONTIME:
CCS:
IONMODE: Negative
COLLISIONENERGY: 30HCD
Comment:
Num Peaks: 44
105.0709739	1.595802225
107.0866239	1.372971826
119.0866239	4.7752332923
121.1022739	19.52335097
125.1335741	2.6361877127
127.1492242	4.6432752263
133.1022739	3.859326893
147.1179241	1.591196854
149.0971886	0.9855638132
153.1284886	5.8913085665
155.1441388	1.084415102
165.0921032	8.001721321
167.1077533	4.987778886
169.1234034	1.6074961772
171.1390533	11.727330089
173.1547035	1.0522401447
179.1077533	1.441679413
183.1390533	2.7425674349
199.1339680	5.0976644586
201.1496181	0.2455808223
213.1496181	1.980697839
215.1288826	3.884265475
217.1445327	2.2797808656
231.1601828	0.2259557972
259.2431245	3.4241926956
261.2587745	1.4806587852
275.2380392	13.185237388
277.2173037	1.429174462
287.2380392	5.903724742
289.2173037	1.502306519
291.2329538	2.9396698869
293.2486038	13.70886637
301.2173037	4.0329811878
303.2329538	2.813710864
305.2486038	5.106891948
319.2278683	37.554121117
32.99820284	0.2367949835
337.2384331	65.77706446
41.00328823	10.4900503713
41.03967373	1.378341732
43.01893830	1.462125213
44.99820284	4.2463472379
59.01385291	28.71600709
81.07097387	1.378341732

NAME: 11-HpETrE_5711
PRECURSORMZ: 337.2384331
PRECURSORTYPE: [M-H]-
FORMULA:
Ontology:
INCHIKEY:
SMILES: CCCCCCCC=CC(CC=CCC=CCCCC(=O)[O-])OO
RETENTIONTIME:
CCS:
IONMODE: Negative
COLLISIONENERGY: 30HCD
Comment:
Num Peaks: 43
109.1022739	1.537991553
111.1179241	1.323572718
121.1022739	3.767904378
123.1179241	8.8993336661
125.1335741	19.221567214
137.1335741	3.642695956
149.0971886	5.7592533395
151.1128387	2.6491850347
151.1492241	1.533264261
153.1284886	0.9768678439
165.0921032	2.7186878246
167.1077533	12.433601316
169.1234034	8.569535124
171.1390533	4.364545532
179.1077533	1.2613409474
181.1234034	1.538417141
183.1390533	1.401573795
195.1026679	4.9858115185
197.1183179	0.8357861402
207.1026679	1.226217207
209.1183179	2.5037133364
211.0975824	3.856798926
213.1132326	2.2683817563
227.1288826	0.2255080433
259.2431245	3.383504765
261.2587745	1.4801705554
275.2380392	13.228159729
277.2173037	1.391394931
287.2380392	5.793781031
289.2173037	1.448253988
291.2329538	2.8819332541
293.2486038	13.725643884
301.2173037	3.9457432053
303.2329538	2.79396494
305.2486038	5.074664202
309.207133	0.1942897324
319.2278683	37.195449556
32.99820284	0.2363229758
337.2384331	65.52450625
41.00328823	10.1433400177
43.01893830	1.408891884
44.99820284	4.1103472515
59.01385291	28.538083283

NAME: 12,13-diHETrE
PRECURSORMZ: 337.2384331
PRECURSORTYPE: [M-H]-
FORMULA:
Ontology:
INCHIKEY:
SMILES: CC=CCCC=CC(O)C(O)C=CCCCCCCCCC(=O)[O-]
RETENTIONTIME:
CCS:
IONMODE: Negative
COLLISIONENERGY: 30HCD
Comment:
Num Peaks: 45
107.0866239	4.1847052797
123.0815386	10.816915589
125.0971886	12.893716626
135.0815385	1.55997239
137.0971886	3.0446853926
137.1335741	1.405418756
139.1492241	2.0475155903
151.0764532	0.6829369067
153.0921032	11.291683113
155.1077533	5.812166076
165.1284886	6.486193308
167.1441388	5.9028688184
169.1234034	1.3209023839
169.1597889	2.1353800126
181.1234034	1.3664277
183.1390533	11.468201116
193.1234034	1.587208218
195.1390533	8.5434975554
197.1547035	5.4714634122
199.1703536	0.3152932879
211.1339680	6.641057199
213.1496181	7.403443428
223.1339680	2.036313407
225.1496181	5.797778203
227.1652682	0.2885520452
239.1288826	0.7182636565
241.1445327	6.846116761
243.1601828	2.926121289
275.2380392	0.4040833684
29.00328822	2.260263407
291.2329538	1.4977317892
293.2486038	12.513871014
311.2227831	0.3739283719
319.2278683	22.620949956
321.207133	1.086507397
337.2384331	58.1192618
41.00328823	7.47747768
43.01893830	1.655811157
44.99820284	2.407086134
59.01385291	25.508588402
61.02950297	2.270377436
71.01385292 2.580402942
81.07097387	1.339196108
93.07097387	3.8244856481
95.08662393	23.065179865

NAME: 12,14-HepEDE
PRECURSORMZ: 337.2384331
PRECURSORTYPE: [M-H]-
FORMULA:
Ontology:
INCHIKEY:
SMILES: CCC=CC=CC(O)C1OC1CCCCCCCCCCC(=O)[O-]
RETENTIONTIME:
CCS:
IONMODE: Negative
COLLISIONENERGY: 30HCD
Comment:
Num Peaks: 48
109.0658885	8.339329409
111.0815386	10.145950567
121.0658885	1.6644453431
123.0815386	5.426645556
125.0971886	3.111942311
139.0764532	1.7770521998
141.0921032	0.5257198627
151.0764532	2.0401837251
153.0921032	0.323203057
167.1441388	1.102366018
17.00328822	0.9712460465
179.1441388	2.152126448
181.1597889	8.9682202133
183.1754388	5.1077268519
185.1547035	2.0817061493
195.1390533	2.101479554
197.1547035	2.644399667
207.1390533	2.341911358
209.1547035	12.109750331
211.1703536	4.9421778912
213.1496181	0.9150578798
213.1860035	0.2852919931
223.1339680	0.6369683994
225.1496181	12.276588407
227.1652682	12.391088066
237.1496181	0.6524442044
239.1652682	3.7000807703
253.1445327	0.7196181917
255.1601828	5.548123815
257.1758328	2.837938074
275.2380392	2.2284324978
29.00328822	0.279780183
291.2329538	1.5274073665
293.2486038	11.786495773
301.2173037	0.3949056092
319.2278683	22.5259796
337.2384331	55.89134598
41.00328823	25.8478086228
43.01893830	8.241937938
44.99820284	1.866785033
55.01893830	2.280463221
56.99820284	1.457025335
59.01385291	18.310472747
71.01385292 2.530246147
73.02950298	1.128022772
79.05532376	2.5841222371
81.07097387	20.363533948
93.07097387	2.9144526324

NAME: 12-HpETrE_111417
PRECURSORMZ: 337.2384331
PRECURSORTYPE: [M-H]-
FORMULA:
Ontology:
INCHIKEY:
SMILES: CC=CCCC=CCC(C=CCCCCCCCCC(=O)[O-])OO
RETENTIONTIME:
CCS:
IONMODE: Negative
COLLISIONENERGY: 30HCD
Comment:
Num Peaks: 44
107.0866239	4.6988794445
109.1022739	20.056946233
121.1022739	3.7689015325
137.0971886	0.7842293423
137.1335741	2.5991522396
139.1492241	4.1242818208
151.1128387	2.053311743
153.0921032	7.730270215
155.1077533	5.059173193
165.0921032	1.287433061
165.1284886	5.8527374066
167.1077533	1.9071783931
167.1441388	1.080133413
169.1234034	1.527298161
181.1234034	2.527777367
183.1390533	11.728935068
185.1547035	0.250752091
195.1390533	2.6172305992
211.1339680	5.0541826566
213.1496181	0.2447631
225.1496181	2.304009304
227.1288826	3.902721835
229.1445327	2.2814069591
259.2431245	3.3893268544
261.2587745	1.4814747312
275.2380392	12.994502911
277.2173037	1.668453446
287.2380392	5.866662803
289.2173037	1.486409545
291.2329538	2.930459046
293.2486038	13.629493894
301.2173037	3.9900751683
303.2329538	2.819291895
305.2486038	5.113730426
309.207133	0.7973747086
311.2227831	0.3544417748
319.2278683	37.469457523
337.2384331	65.7701526
41.00328823	10.3454204927
43.01893830	1.418836748
44.99820284	3.545363279
59.01385291	28.99487939
81.07097387	1.272636138
93.07097387	1.219851442

NAME: 13,14-diHETrE
PRECURSORMZ: 337.2384331
PRECURSORTYPE: [M-H]-
FORMULA:
Ontology:
INCHIKEY:
SMILES: CCC=CC=CC(O)C(O)C=CCCCCCCCCCC(=O)[O-]
RETENTIONTIME:
CCS:
IONMODE: Negative
COLLISIONENERGY: 30HCD
Comment:
Num Peaks: 44
109.0658885	10.81737397
111.0815386	12.897868141
121.0658885	1.556629688
123.0815386	3.04214869
137.0608030	0.6843205399
139.0764532	11.298481493
141.0921032	5.817371235
151.1492241	1.6872808778
153.1648743	2.0492129584
155.1077533	0.3128292941
179.1441388	6.491120645
181.1597889	5.9224953891
183.1754388	2.1654136662
195.1390533	1.3692166144
197.1547035	11.495570501
207.1390533	1.583774902
209.1547035	8.6360570987
211.1703536	5.4675457833
213.1860035	0.3156785985
225.1496181	6.645605667
227.1652682	7.432511548
237.1496181	2.712474808
239.1652682	5.794314042
241.1809182	0.288904676
253.1445327	0.7196732914
255.1601828	6.856785303
257.1758328	2.933812788
275.2380392	0.4045771866
29.00328822	2.261468517
291.2329538	1.5008365085
293.2486038	12.543053574
319.2278683	22.66298583
321.207133	1.084070827
337.2384331	58.28666752
41.00328823	7.2276013113
43.01893830	1.652263092
44.99820284	2.401747072
59.01385291	25.507830177
61.02950297	2.265464784
67.05532376	1.336249838
71.01385292 2.574841414
79.05532376	3.8225423774
81.07097387	23.291364243
93.07097387	4.1819635211

NAME: 13,14-HepEDE
PRECURSORMZ: 337.2384331
PRECURSORTYPE: [M-H]-
FORMULA:
Ontology:
INCHIKEY:
SMILES: CCC=CCC1OC1C(O)C=CCCCCCCCCCC(=O)[O-]
RETENTIONTIME:
CCS:
IONMODE: Negative
COLLISIONENERGY: 30HCD
Comment:
Num Peaks: 54
107.0502384	1.058741232
109.0658885	19.042856883
111.0815386	22.910185706
123.0815386	0.5870145033
139.0764532	8.241034618
141.0921032	4.089962464
151.1492241	1.385184905
153.1648743	1.9646964825
155.1077533	0.9968563798
17.00328822	1.168139709
179.1441388	5.2446286849
181.1597889	3.6399343873
183.1754388	1.3331612733
195.1390533	1.3216907733
195.1754388	2.427274787
197.1547035	10.88592016
209.1547035	5.915690821
211.1703536	0.5441956188
221.1547035	1.264526132
223.1703536	3.473489369
225.1496181	6.1686615972
227.1652682	6.5595631235
237.1496181	1.9217527467
239.1652682	3.9498758497
241.1809182	2.330199109
251.1652682	0.8862040465
255.1601828	0.744421285
257.1758328	0.4402969295
267.1601827	0.3764347285
269.1758328	0.2615137992
275.2380392	1.378924064
291.2329538	1.3410101742
293.2486038	11.245887711
301.2173037	0.4021355434
319.2278683	21.92896506
337.2384331	56.05162655
41.00328823	33.811664433
41.03967373	0.8015520748
43.01893830	11.301420966
44.99820284	1.051381845
55.01893830	3.10572193
56.99820284	0.7462670199
57.03458836	0.9645458719
59.01385291	11.669520929
67.05532376	1.197250787
69.07097387	5.190521276
71.01385292 2.985380452
73.02950298	1.339450023
79.05532376	1.880066569
81.07097387	3.40382627
93.03458836	1.021100778
93.07097387	1.220541208
95.05023841	2.126356057
97.06588849	2.7007743119

NAME: 13,15-HepEDE
PRECURSORMZ: 337.2384331
PRECURSORTYPE: [M-H]-
FORMULA:
Ontology:
INCHIKEY:
SMILES: CCC=CC(O)C1OC1CC=CCCCCCCCCCC(=O)[O-]
RETENTIONTIME:
CCS:
IONMODE: Negative
COLLISIONENERGY: 30HCD
Comment:
Num Peaks: 49
113.0608031	1.9498767953
115.0764532	0.5573939974
125.0608031	2.0161585189
127.0764532	0.3419159492
17.00328822	0.9682863823
193.1597889	0.4650966976
205.1597889	2.157952517
207.1754388	8.9645417086
209.1547035	0.8282745842
209.1910890	5.3569623413
211.1703536	2.0648429095
221.1547035	2.050305633
223.1703536	2.9398495
233.1547035	2.21247063
235.1703536	11.874166993
237.1860035	5.358665447
239.1652682	0.8991341387
239.2016537	0.2849745706
251.1652682	12.310680527
253.1809182	12.312237442
263.1652682	0.6493300862
265.1809182	3.6762502061
275.2380392	2.2217750832
279.1601827	0.716398455
281.1758328	5.531861415
283.1914828	2.831678124
29.00328822	0.2792185136
291.2329538	1.5224955248
293.2486038	11.754504424
301.2173037	0.3944762974
319.2278683	22.4680362
337.2384331	55.82053839
41.00328823	25.3370421601
43.01893830	8.220907451
44.99820284	1.864275912
53.03967373	2.5495202222
55.01893830	2.099553696
55.05532376	20.74772675
56.99820284	1.911699201
57.03458836	0.7495076859
59.01385291	17.997965737
67.05532376	2.8611554089
71.01385292 2.486314607
73.02950298	1.108436162
83.05023841	8.256545967
85.06588849	9.892718161
95.05023841	1.6462768421
97.06588849	5.40193163
99.08153855 3.088072411

NAME: 14-HpETrE_111417
PRECURSORMZ: 337.2384331
PRECURSORTYPE: [M-H]-
FORMULA:
Ontology:
INCHIKEY:
SMILES: CCC=CC=CC(CC=CCCCCCCCCCC(=O)[O-])OO
RETENTIONTIME:
CCS:
IONMODE: Negative
COLLISIONENERGY: 30HCD
Comment:
Num Peaks: 44
109.0658885	0.9908991823
125.0608031	7.613758558
127.0764532	5.074716704
139.0764532	1.374912934
153.0921032	1.272971934
165.1648743	2.6014194812
167.1805243	4.12993314
193.1597889	5.8611583961
195.1754388	1.09124416
209.1547035	1.1910840398
211.1703536	11.906622443
213.1860035	0.251410091
223.1703536	3.0015575303
239.1652682	5.0705793364
241.1809182	0.246084183
251.1652682	1.25310802
253.1809182	2.5557387149
255.1601828	4.023736883
257.1758328	2.2901785425
259.2431245	3.3937037177
261.2587745	1.4849271829
271.1914828	0.2265294914
275.2380392	13.053377368
277.2173037	1.670719672
287.2380392	5.889069195
289.2173037	1.479549004
291.2329538	2.930116474
293.2486038	13.697132463
301.2173037	4.014475067
303.2329538	2.828625581
305.2486038	5.133518179
319.2278683	37.678043668
32.99820284	0.2373628391
337.2384331	66.06470643
41.00328823	10.3554566891
41.03967373	1.383314576
43.01893830	1.439788735
44.99820284	4.1966555504
59.01385291	29.709101796
65.03967373	1.636607749
67.05532376	1.352173522
79.05532376	4.6404582914
81.07097387	20.096293484
93.07097387	3.6071790009

NAME: 15,16-diHETrE
PRECURSORMZ: 337.2384331
PRECURSORTYPE: [M-H]-
FORMULA:
Ontology:
INCHIKEY:
SMILES: CCC=CC(O)C(O)C=CC=CCCCCCCCCCC(=O)[O-]
RETENTIONTIME:
CCS:
IONMODE: Negative
COLLISIONENERGY: 30HCD
Comment:
Num Peaks: 44
111.045153	0.698510524
113.0608031	11.48766598
115.0764532	5.930528313
129.0921032	1.0563806942
177.1648743	1.67966105
179.1805243	2.0401353694
205.1597889	6.482768973
207.1754388	5.9822151121
209.1547035	1.142585718
209.1910890	2.1542605698
221.1547035	1.2906293919
223.1703536	12.042249921
233.1547035	1.505288214
235.1703536	8.4618228976
237.1860035	5.9842103076
239.2016537	0.3151649554
251.1652682	6.704259155
253.1809182	7.40407638
263.1652682	2.021407074
265.1809182	5.769155351
267.1965683	0.288434597
275.2380392	0.403918896
279.1601827	0.7163657614
281.1758328	6.83366413
283.1914828	2.926843002
29.00328822	2.229959735
291.2329538	1.495773855
293.2486038	12.511920942
319.2278683	22.598327251
337.2384331	58.19617313
41.00328823	7.1685818709
41.03967373	1.307042415
43.01893830	1.374618601
44.99820284	2.145963712
53.03967373	3.7671663977
55.05532376	23.904817411
59.01385291	25.251888954
61.02950297	2.253733399
67.05532376	4.106813205
71.01385292 2.45371674
83.05023841	10.584022005
85.06588849	12.750858345
95.05023841	1.548552994
97.06588849	3.027866704

NAME: 15-HpETrE_111417
PRECURSORMZ: 337.2384331
PRECURSORTYPE: [M-H]-
FORMULA:
Ontology:
INCHIKEY:
SMILES: CCC=CCC(C=CC=CCCCCCCCCCC(=O)[O-])OO
RETENTIONTIME:
CCS:
IONMODE: Negative
COLLISIONENERGY: 30HCD
Comment:
Num Peaks: 43
111.0815386	2.087359877
113.0608031	7.869163553
115.0764532	4.597045609
127.0764532	2.8491608945
129.0921032	1.2213677143
153.0921032	1.251031951
177.1648743	2.5612722749
179.1805243	4.0670680766
205.1597889	6.3427983338
207.1754388	1.078142277
221.1547035	2.4897394991
223.1703536	12.111486604
225.1860035	0.2509378987
235.1703536	3.1376283797
251.1652682	4.9976649732
253.1809182	0.2449195025
259.2431245	3.3530070007
261.2587745	1.4798505179
265.1809182	2.254307413
267.1601827	4.013435883
269.1758328	2.2854488408
275.2380392	12.8978427
277.2173037	1.6323351
287.2380392	5.815976035
289.2173037	1.454048615
291.2329538	1.6631823941
293.2486038	13.622313608
301.2173037	3.9470447339
303.2329538	2.821486849
305.2486038	5.121346449
319.2278683	37.425161961
32.99820284	0.2370459587
337.2384331	65.94542126
41.00328823	10.1478515702
41.03967373	1.277575341
43.01893830	1.388229724
44.99820284	3.46824309
53.03967373	1.28164767
59.01385291	28.204772876
67.05532376	4.5559747088
69.07097387	20.752970202
81.07097387	3.4563712432
97.06588849	2.3403208415

NAME: 16,17-hepEDE
PRECURSORMZ: 337.2384331
PRECURSORTYPE: [M-H]-
FORMULA:
Ontology:
INCHIKEY:
SMILES: CCC1OC1C(O)C=CCC=CCCCCCCCCCC(=O)[O-]
RETENTIONTIME:
CCS:
IONMODE: Negative
COLLISIONENERGY: 30HCD
Comment:
Num Peaks: 54
101.0608031	4.9238756938
115.0764532	0.3266863856
17.00328822	1.200276017
191.1805243	1.405273258
193.1961743	1.9967973987
219.1754388	4.9191155088
221.1910890	3.7211140184
223.1703536	0.6663081222
223.2067390	1.3544491042
235.1703536	1.2600912937
235.2067390	2.497776362
237.1860035	11.19700091
249.1860035	5.91912443
251.2016537	1.2367950402
261.1860035	0.963974363
263.2016537	2.052639325
265.1809182	6.1504577875
267.1965683	6.6844428991
275.2380392	1.391074831
277.1809182	1.995564406
279.1965683	3.705984995
281.2122183	2.272080362
291.2329538	1.3548551749
293.1758328	0.6294849833
293.2486038	11.496580536
295.1914828	0.752156468
297.207133	0.4194113452
301.2173037	0.4029784669
307.1914828	0.4348002598
309.207133	0.4362696135
319.2278683	22.225371144
337.2384331	57.04778682
39.02402367	4.140384611
41.00328823	24.5209967599
41.03967373	4.366814796
43.01893830	9.985201612
43.05532376	0.763892125
44.99820284	1.118670533
51.02402367	0.2631855615
53.00328823	0.572871357
53.03967373	1.9415621856
55.01893830	4.031855906
56.99820284	0.7920204285
57.03458836	4.392445957
59.01385291	11.743108859
59.05023841	0.7007887371
65.00328822	0.8548515245
67.01893830	2.040336534
69.03458836	25.831721535
71.01385292 1.407653929
71.05023841	27.163620064
73.02950298	1.012086531
83.05023841	0.5885801094
99.04515304	8.726753028

NAME: 17,18-diHETrE
PRECURSORMZ: 337.2384331
PRECURSORTYPE: [M-H]-
FORMULA:
Ontology:
INCHIKEY:
SMILES: CC(O)C(O)C=CC=CCC=CCCCCCCCCCC(=O)[O-]
RETENTIONTIME:
CCS:
IONMODE: Negative
COLLISIONENERGY: 30HCD
Comment:
Num Peaks: 41
115.0764532	0.2124014151
155.1077533	0.1778223374
17.00328822	0.1737813211
217.1961743	0.6105497177
219.2118244	0.7991300516
223.1703536	1.05301896
237.1860035	0.8494381021
245.1910890	3.8084338268
247.2067390	5.597195028
249.2223890	5.530428401
261.1860035	0.8345364464
263.2016537	6.982915527
273.1860035	2.7328068409
275.2016537	10.8353179588
275.2380392	9.217619899
277.2173037	9.268047281
291.1965683	10.678142997
291.2329538	1.2912179557
293.2122183	11.404929787
293.2486038	12.19432332
295.2278683	0.6991896842
301.2173037	6.29836978
303.1965683	2.8657402791
319.2278683	36.364398789
321.207133	3.98215485
337.2384331	65.17656422
41.00328823	6.9581094067
43.01893830	4.9325612906
44.99820284	3.3226467459
45.03458836	1.0283267443
55.01893830	5.725299737
56.99820284	2.0409891
57.03458836	8.2193589056
59.01385291	21.373462584
61.02950297	1.255232167
71.01385292 6.183513537
73.02950298	19.147827684
75.04515304	5.9585777587
85.02950298	1.005588377
87.04515304	1.969659402
89.06080310	1.2403717871

NAME: 17,19-HepEDE
PRECURSORMZ: 337.2384331
PRECURSORTYPE: [M-H]-
FORMULA:
Ontology:
INCHIKEY:
SMILES: CC(O)C1OC1CC=CCC=CCCCCCCCCCC(=O)[O-]
RETENTIONTIME:
CCS:
IONMODE: Negative
COLLISIONENERGY: 30HCD
Comment:
Num Peaks: 45
101.0608031	0.6122331676
115.0764532	0.2283071008
155.1077533	0.191138568
207.2118244	0.1995721161
223.1703536	0.9455327274
233.1910890	1.5873438902
235.2067390	1.2314885198
247.2067390	5.2166431171
249.1860035	0.221355019
249.2223890	2.7738342314
251.2016537	3.4199373573
261.1860035	1.396888162
263.2016537	1.6386095805
275.2016537	6.0327418092
275.2380392	8.664908632
277.2173037	4.4714048859
279.1965683	2.7767653446
289.2173037	0.58785921
291.1965683	5.023101208
291.2329538	1.9578886805
293.2122183	6.315965484
293.2486038	14.971835779
301.2173037	4.9506776881
319.2278683	41.985278293
321.207133	4.1659712816
337.2384331	72.83252757
41.00328823	22.7091561239
41.03967373	0.5916356479
43.01893830	4.578450982
44.99820284	2.8733897908
55.01893830	3.665528216
56.99820284	2.567019903
57.03458836	11.3341109985
59.01385291	19.183305052
59.05023841	4.719030101
67.01893830	2.506589576
68.99820284	1.412196002
69.03458836	3.397143799
71.01385292 3.911814036
73.02950298	8.3100701002
75.04515304	0.6072979494
83.01385292 1.745208382
85.02950298	7.468245386
87.04515304	3.4974224562
99.04515304	0.5225760845

NAME: 17-HpETrE_111417
PRECURSORMZ: 337.2384331
PRECURSORTYPE: [M-H]-
FORMULA:
Ontology:
INCHIKEY:
SMILES: CCC(C=CC=CCC=CCCCCCCCCCC(=O)[O-])OO
RETENTIONTIME:
CCS:
IONMODE: Negative
COLLISIONENERGY: 30HCD
Comment:
Num Peaks: 41
153.0921032	1.403895832
217.1961743	2.853532815
219.2118244	4.4412747883
245.1910890	6.3443509552
247.2067390	3.2599155912
259.2431245	3.6164695238
261.1860035	1.3405475619
261.2587745	1.5553471051
263.2016537	12.7764629
265.2173037	1.7916753339
275.2016537	3.149645022
275.2380392	14.188442727
277.2173037	2.053646686
287.2380392	6.316453664
289.2173037	2.354311421
29.03967374	1.5570890317
291.1965683	5.088447946
291.2329538	3.3493085732
293.2122183	1.782291606
293.2486038	14.800080983
301.2173037	3.5023269392
303.1965683	1.500092493
303.2329538	2.997478408
305.2486038	5.457745491
307.1914828	4.209626172
309.207133	2.848102628
319.2278683	40.595609604
32.99820284	0.2458099208
337.2384331	70.46824428
41.00328823	11.5388970017
41.03967373	4.5631543762
43.01893830	1.723398203
44.99820284	3.919079986
59.01385291	30.233236746
69.03458836	1.639616623
71.05023841	1.764109363
73.02950298	8.705514091
75.04515304	4.942714436
85.02950298	1.726930019
87.04515304	2.2237372248
89.06080310	1.1713859328

NAME: 4,5-diHETrE_5711
PRECURSORMZ: 337.2384331
PRECURSORTYPE: [M-H]-
FORMULA:
Ontology:
INCHIKEY:
SMILES: CCCCCCCCC=CCC=CC=CC(O)C(O)CCC(=O)[O-]
RETENTIONTIME:
CCS:
IONMODE: Negative
COLLISIONENERGY: 30HCD
Comment:
Num Peaks: 190
101.0244176	7.752697348
103.0400676	6.078411307
113.0244176	2.204066112
115.0400676	4.9137522555
131.0349823	3.9423551158
133.0506322	1.5662038072
145.0506322	0.2030604348
147.0662824	0.2508583044
203.1805243	0.6134448166
205.1961743	11.942419496
215.1805243	1.135629526
217.1961743	4.7403984865
231.1754388	0.905743145
233.1910890	12.116978208
235.2067390	10.295136392
245.1910890	2.17667142
247.2067390	3.9128333086
263.2016537	6.5586668351
265.2173037	3.5100560036
275.2016537	0.6722515976
275.2380392	6.37847062
277.2173037	1.480201034
291.2329538	1.678658429
293.2486038	12.531514475
301.2173037	4.094891668
309.207133	0.1972862681
319.2278683	30.48852015
321.207133	0.8524307675
337.2384331	64.17638991
41.00328823	10.5558983324
43.01893830	1.427340426
44.99820284	1.849208839
55.01893830	4.5437969228
56.99820284	1.747651928
57.03458836	3.9231037946
59.01385291	36.590448455
59.05023841	3.1650158108
61.02950297	3.659382694
71.01385292 2.1808752155
73.02950298	7.245979837
83.01385292 1.9975555489
85.02950298	6.8776360919
87.04515304	6.0332605542
99.00876753	0.8328482992

NAME: 4,5-HepEDE_5711
PRECURSORMZ: 337.2384331
PRECURSORTYPE: [M-H]-
FORMULA:
Ontology:
INCHIKEY:
SMILES: CCCCCCCCC=CCC1OC1C(O)C=CCCCC(=O)[O-]
RETENTIONTIME:
CCS:
IONMODE: Negative
COLLISIONENERGY: 30HCD
Comment:
Num Peaks: 54
111.045153	1.1655723934
111.0815386	2.440802792
113.0608031	10.920337715
125.0608031	5.596829721
125.1335741	0.783037687
127.0764532	0.5451062389
137.0608030	1.197129043
139.0764532	3.1918898791
141.0557177	6.11880389
143.0713677	6.5996001004
151.1492241	0.9374814097
153.0557177	1.9566874061
153.1648743	5.501486938
155.0713677	4.6121934053
157.0870179	2.345843038
163.1492241	1.969125508
165.1648743	3.414558486
167.0713677	0.9102858288
17.00328822	1.169153695
171.0662824	0.7456669491
173.0819324	0.4410336925
177.1284886	0.9810876601
177.1648743	1.219333051
179.1441388	2.133465851
181.1597889	2.915665594
183.0662824	0.3770646288
185.0819324	0.2619513987
191.1441388	1.113269999
193.1597889	19.080973756
195.1754388	23.033901157
207.1754388	0.5879967736
223.1703536	8.304581356
225.1860035	4.01700615
239.2016537	0.2767629776
275.2380392	1.381231462
291.2329538	1.3472388303
293.2486038	11.288823763
301.2173037	0.4028084497
319.2278683	22.01857572
337.2384331	56.19923415
41.00328823	33.1955999324
43.01893830	11.11370306
44.99820284	1.093855122
55.01893830	2.909793512
56.99820284	0.7665461419
57.03458836	0.9119909037
59.01385291	12.012204926
67.05532376	1.393229399
69.07097387	2.063637844
71.01385292 2.91929079
73.02950298	1.37584835
95.05023841	5.765211885
97.06588849	3.6361927882
99.08153855 1.3392968045

NAME: 5,7-HepEDE_5711
PRECURSORMZ: 337.2384331
PRECURSORTYPE: [M-H]-
FORMULA:
Ontology:
INCHIKEY:
SMILES: CCCCCCCCC=CCC=CC(O)C1OC1CCCC(=O)[O-]
RETENTIONTIME:
CCS:
IONMODE: Negative
COLLISIONENERGY: 30HCD
Comment:
Num Peaks: 48
109.0295030	2.2540463651
111.045153	11.818555228
113.0608031	4.9568166402
115.0400676	0.867946569
115.0764532	0.2853393317
123.0087675	0.8116939712
127.0400676	12.961393505
129.0557177	12.426152061
139.0400677	0.6548818152
141.0557177	3.6661638672
155.0349823	0.6397657289
157.0506322	5.5651434
159.0662824	2.840140543
17.00328822	0.9764336666
177.1648743	2.4014077011
179.1805243	20.052159531
191.1805243	2.9281069205
207.1754388	8.586086744
209.1910890	10.006460553
219.1754388	1.6761100132
221.1910890	5.448175557
223.2067390	3.114508375
237.1860035	1.7875835247
239.2016537	0.5073517248
249.1860035	2.0534146313
251.2016537	0.3236257782
275.2380392	2.2333558928
29.00328822	0.2808528692
291.2329538	1.5321223386
293.2486038	11.817180026
301.2173037	0.3954148216
319.2278683	22.5870832
337.2384331	56.00145673
41.00328823	25.9430490208
43.01893830	7.788440997
44.99820284	1.912474643
55.01893830	2.553731153
56.99820284	1.07562843
59.01385291	18.385561116
69.03458836	1.3164449827
71.01385292 2.504257753
73.02950298	1.167087535
81.03458836	2.175878712
83.05023841	9.1575861963
85.06588849	5.142510868
87.04515304	2.0512255399
97.02950298	1.800889274
99.04515304	2.568304159

NAME: 5-HpETrE_5711
PRECURSORMZ: 337.2384331
PRECURSORTYPE: [M-H]-
FORMULA:
Ontology:
INCHIKEY:
SMILES: CCCCCCCCC=CCC=CC=CC(CCCC(=O)[O-])OO
RETENTIONTIME:
CCS:
IONMODE: Negative
COLLISIONENERGY: 30HCD
Comment:
Num Peaks: 44
115.0400676	4.9013566821
117.0557177	0.2461395832
127.0400676	1.469540551
129.0557177	2.5560203559
131.0349823	3.90705156
133.0506322	2.247738898
147.0662824	0.2266354995
189.1648743	1.859024401
191.1805243	1.353474735
203.1805243	5.2198250362
205.1961743	21.349382596
217.1961743	4.0123831308
231.2118244	1.180929296
233.1910890	0.9887889274
247.2067390	1.649780196
249.1860035	7.668922014
251.2016537	4.400461608
259.2431245	3.3087068672
261.2587745	1.4839373787
263.2016537	1.227533346
275.2380392	13.019662164
277.2173037	1.672835931
287.2380392	5.888344588
289.2173037	1.480972792
291.2329538	1.6115686337
293.2486038	13.709739442
301.2173037	3.9920919632
303.2329538	2.829072807
305.2486038	5.135440134
319.2278683	37.668873219
32.99820284	0.2374608754
337.2384331	66.11578227
41.00328823	10.3581342842
41.03967373	3.551956131
43.01893830	1.440296914
43.05532376	4.9897479177
44.99820284	4.4255965373
59.01385291	26.286443047
69.03458836	6.1565119442
71.05023841	1.09051082
85.02950298	2.3560554766
87.04515304	12.068107806
89.06080310	0.2479698696
99.04515304	2.4091917841

NAME: 7,8-HepEDE_5711
PRECURSORMZ: 337.2384331
PRECURSORTYPE: [M-H]-
FORMULA:
Ontology:
INCHIKEY:
SMILES: CCCCCCCCC=CCC1OC1C(O)C=CCCCC(=O)[O-]
RETENTIONTIME:
CCS:
IONMODE: Negative
COLLISIONENERGY: 30HCD
Comment:
Num Peaks: 54
111.045153	1.1655723934
111.0815386	2.440802792
113.0608031	10.920337715
125.0608031	5.596829721
125.1335741	0.783037687
127.0764532	0.5451062389
137.0608030	1.197129043
139.0764532	3.1918898791
141.0557177	6.11880389
143.0713677	6.5996001004
151.1492241	0.9374814097
153.0557177	1.9566874061
153.1648743	5.501486938
155.0713677	4.6121934053
157.0870179	2.345843038
163.1492241	1.969125508
165.1648743	3.414558486
167.0713677	0.9102858288
17.00328822	1.169153695
171.0662824	0.7456669491
173.0819324	0.4410336925
177.1284886	0.9810876601
177.1648743	1.219333051
179.1441388	2.133465851
181.1597889	2.915665594
183.0662824	0.3770646288
185.0819324	0.2619513987
191.1441388	1.113269999
193.1597889	19.080973756
195.1754388	23.033901157
207.1754388	0.5879967736
223.1703536	8.304581356
225.1860035	4.01700615
239.2016537	0.2767629776
275.2380392	1.381231462
291.2329538	1.3472388303
293.2486038	11.288823763
301.2173037	0.4028084497
319.2278683	22.01857572
337.2384331	56.19923415
41.00328823	33.1955999324
43.01893830	11.11370306
44.99820284	1.093855122
55.01893830	2.909793512
56.99820284	0.7665461419
57.03458836	0.9119909037
59.01385291	12.012204926
67.05532376	1.393229399
69.07097387	2.063637844
71.01385292 2.91929079
73.02950298	1.37584835
95.05023841	5.765211885
97.06588849	3.6361927882
99.08153855 1.3392968045

NAME: 8,10-HepEDE_5711
PRECURSORMZ: 337.2384331
PRECURSORTYPE: [M-H]-
FORMULA:
Ontology:
INCHIKEY:
SMILES: CCCCCCCCC=CC(O)C1OC1CC=CCCCC(=O)[O-]
RETENTIONTIME:
CCS:
IONMODE: Negative
COLLISIONENERGY: 30HCD
Comment:
Num Peaks: 48
109.0658885	1.1050903235
121.0658885	2.174241002
123.0815386	9.0481626281
125.0971886	5.3748614816
127.0764532	2.086152121
137.0608030	1.910050621
137.1335741	2.5995925249
139.0764532	2.658381809
139.1492241	19.786471568
149.0608030	2.2099932955
151.0764532	11.771667469
151.1492241	2.9207208059
153.0921032	4.9495327875
155.0713677	0.918459219
155.1077533	0.2854877571
165.0557177	0.6393296565
167.0713677	12.904889917
167.1441388	8.397332641
169.0870179	12.420806629
169.1597889	9.987199287
17.00328822	0.9743050212
179.0713677	0.6537883153
179.1441388	1.669524625
181.0870179	3.7073957554
181.1597889	5.4390207
183.1754388	3.109274778
195.0662824	0.6387492838
197.0819324	5.558972385
197.1547035	1.7787041147
199.0975824	2.842811902
199.1703536	0.5071242474
209.1547035	2.0414281591
211.1703536	0.3234859584
275.2380392	2.2299941231
29.00328822	0.2803683674
291.2329538	1.5302936087
293.2486038	11.802398381
301.2173037	0.3951866763
319.2278683	22.56488772
337.2384331	55.97417855
41.00328823	26.0935992244
43.01893830	8.346412825
44.99820284	1.890829895
55.01893830	2.305348556
56.99820284	1.068916384
59.01385291	18.452564185
71.01385292 2.53975294
73.02950298	1.132259768

NAME: 9,10-diHETrE_5711
PRECURSORMZ: 337.2384331
PRECURSORTYPE: [M-H]-
FORMULA:
Ontology:
INCHIKEY:
SMILES: CCCCCCCCC=CC(O)C(O)C=CC=CCCCC(=O)[O-]
RETENTIONTIME:
CCS:
IONMODE: Negative
COLLISIONENERGY: 30HCD
Comment:
Num Peaks: 43
121.0658885	6.470737991
123.0815386	5.8898697595
125.0971886	2.1473499003
125.1335741	1.346735646
137.0608030	1.2792185032
137.1335741	3.8540457357
139.0764532	11.490318545
139.1492241	22.469365057
149.0608030	1.231307394
151.0764532	8.0414214494
151.1492241	4.2074655671
153.0921032	5.5003031011
155.1077533	0.3163281902
167.0713677	6.618848875
167.1441388	10.903824092
169.0870179	7.447463232
169.1597889	12.992130739
179.0713677	2.7315370583
179.1441388	1.595817689
181.0870179	5.827162712
181.1597889	3.0608216557
183.1026679	0.2894991734
195.0662824	0.6874167473
195.1390533	0.6874167473
197.0819324	6.886475167
197.1547035	11.211770872
199.0975824	2.94138307
199.1703536	5.428507768
213.1860035	0.2936716384
275.2380392	0.4054097106
29.00328822	2.271467786
291.2329538	1.5060450986
293.2486038	12.576697784
319.2278683	22.738542203
337.2384331	58.38713587
41.00328823	7.5079914054
43.01893830	1.656922155
44.99820284	2.409429464
59.01385291	26.844391632
61.02950297	2.297827403
71.01385292 2.598499541
93.07097387	1.6932414572
95.08662393	3.2581844213

NAME: 9-HpETrE_5711
PRECURSORMZ: 337.2384331
PRECURSORTYPE: [M-H]-
FORMULA:
Ontology:
INCHIKEY:
SMILES: CCCCCCCCC=CCC(C=CC=CCCCC(=O)[O-])OO
RETENTIONTIME:
CCS:
IONMODE: Negative
COLLISIONENERGY: 30HCD
Comment:
Num Peaks: 42
121.0658885	5.8997323228
123.0815386	2.179676743
137.0608030	2.2425158331
137.1335741	1.140452214
139.0764532	11.815785601
141.0921032	0.2515834634
151.0764532	1.077004129
151.1492241	5.1716513567
153.1648743	19.722657467
165.1648743	3.8016366398
167.0713677	5.094446152
169.0870179	0.2455654954
181.0870179	2.331788129
181.1597889	2.0907199653
183.0662824	3.923780304
185.0819324	2.2927553801
195.1754388	1.646545799
197.1547035	7.484582061
199.1703536	4.409464762
209.1547035	1.303252767
211.1703536	1.6438767137
213.1860035	1.0917601181
259.2431245	3.4157207541
261.2587745	1.4873998497
275.2380392	13.07894868
277.2173037	1.688698348
287.2380392	5.907543367
289.2173037	1.504632148
291.2329538	2.9553767311
293.2486038	13.713411761
301.2173037	4.0212473178
303.2329538	2.83339186
305.2486038	5.140607701
319.2278683	37.70004348
32.99820284	0.2375968538
337.2384331	66.10450765
41.00328823	10.4600806453
43.01893830	1.435943284
44.99820284	4.2579073901
59.01385291	29.747065141
93.07097387	2.623347372
95.08662393	4.8252962621
