# Supplementary material for: Viral Infection Leads to a Unique Suite of Allelopathic Chemical Signals in Three Diatom Host–Virus Pairs
Source: Mar Drugs. 2024 May 17;22(5):228. doi: 10.3390/md22050228 (PMC11123003; doi:10.3390/md22050228)
Supplement: Supplementary file 1 [file marinedrugs-22-00228-s001.zip › Supplemental File S1c oxylipin_standard_BRE.msp]

NAME: 11-HETE
PRECURSORMZ: 319.2278683
PRECURSORTYPE: [M-H]-
FORMULA:
Ontology:
INCHIKEY:
SMILES: CCCCCC=CC=CC([O-])CC=CCC=CCCCC(=O)O
RETENTIONTIME:
CCS:
IONMODE: Negative
COLLISIONENERGY: 30HCD
Comment:
Num Peaks: 50
101.0608031	0.1444179321
107.0866239	1.866272911
109.1022739	2.7991985311
111.1179241	0.5019640948
121.1022739	4.2105974355
123.1179241	14.582261955
133.1022739	1.192170611
135.0815385	1.341518585
135.1179241	2.5169925959
141.0921032	0.1444179321
149.0971886	3.8336518267
149.1335741	1.525785948
151.1128387	6.8389531622
153.1284886	3.7974362119
163.1128387	1.815778775
165.0921032	0.7317731741
165.1284886	3.3013449779
167.1077533	5.181231452
167.1441388	2.0045286291
17.00328822	0.1725821406
177.0921032	1.333330136
179.1077533	2.396578144
179.1441388	1.138551084
181.1597889	0.182247217
191.1077533	1.227935068
193.1234034	2.3668812804
195.1026679	1.3998388455
197.1183179	0.9033868947
207.1026679	0.5839969978
209.1183179	1.004786142
211.1339680	1.3110332294
219.1754388	1.138551084
221.1910890	0.182247217
237.1496181	0.182247217
255.2118244	1.1793537693
257.2274745	16.08832142
259.2067390	2.6498211796
271.2067390	2.5359064796
273.2223890	6.3719990947
275.2380392	21.422202982
283.2067390	1.2204407467
291.1965683	0.1539191247
301.2173037	31.39648901
319.2278683	91.36932808
41.00328823	7.645163934
43.01893830	2.873242473
44.99820284	4.8419191233
59.01385291	35.076604846
83.08662393	1.138551084
85.10227394	0.182247217

NAME: 12-HETE
PRECURSORMZ: 319.2278683
PRECURSORTYPE: [M-H]-
FORMULA:
Ontology:
INCHIKEY:
SMILES: CCCCCC=CCC([O-])C=CC=CCC=CCCCC(=O)O
RETENTIONTIME:
CCS:
IONMODE: Negative
COLLISIONENERGY: 30HCD
Comment:
Num Peaks: 46
109.1022739	0.7428226929
111.1179241	12.863576983
121.1022739	1.294675022
123.1179241	1.793950543
133.1022739	2.0750209838
135.1179241	2.970708755
137.0971886	1.754161939
137.1335741	1.202030143
139.1128387	5.3340913273
141.1284886	3.0010893357
151.1128387	2.402519103
153.1284886	4.0069776034
155.1441388	3.0504801847
161.0971886	3.7644482949
163.1128387	3.8712734293
165.1284886	1.472826149
17.00328822	0.157252105
177.0921032	0.2120142005
177.1284886	1.464358166
179.1077533	3.975376205
179.1441388	1.420445068
181.1597889	0.1660586571
189.0921032	1.482633824
191.1077533	3.4490334335
205.1234034	2.4840158839
207.1026679	1.1954060173
209.1183179	0.7103045418
221.1910890	0.1660586571
223.1339680	0.4624064088
237.1496181	0.1660586571
255.2118244	1.0604866785
257.2274745	13.773686279
259.2067390	2.7952082207
271.2067390	2.3858129447
273.2223890	6.1543685712
275.2380392	17.856095466
283.2067390	5.504489416
291.1965683	0.1383669752
301.2173037	51.267419661
319.2278683	77.3306066
41.00328823	12.6148039302
43.01893830	3.5154854994
44.99820284	4.4968536052
59.01385291	30.47187272
85.10227394	0.1660586571
95.08662393	1.356310458

NAME: 12_13-diHOME
PRECURSORMZ: 313.2384331
PRECURSORTYPE: [M-H]-
FORMULA:
Ontology:
INCHIKEY:
SMILES: CCCCCC([O-])C(O)CC=CCCCCCCCC(=O)O
RETENTIONTIME:
CCS:
IONMODE: Negative
COLLISIONENERGY: 30HCD
Comment:
Num Peaks: 44
101.0971886	11.126906508
111.0815386	2.402021587
113.0971886	4.4474989273
127.0764532	1.447586264
129.0921032	8.8277380181
131.1077533	4.0457343218
139.1492241	0.8876913082
157.1234034	0.2660157765
165.1284886	2.3533923074
167.1441388	4.1659564938
169.1597889	3.2061451839
181.1234034	0.1951281884
183.1390533	6.622305726
193.1234034	2.1580773491
195.1390533	7.5598463411
197.1547035	6.7651629122
199.1703536	1.9640501304
211.1339680	7.949839735
213.1496181	6.889638357
223.1339680	2.901722597
225.1496181	5.8502919841
241.1445327	4.4508065779
243.1601828	1.6324581563
251.2380392	6.417915661
255.1601828	1.113668309
267.2329538	1.7014470327
269.2486038	12.85165501
277.2173037	3.596118319
285.207133	0.1986057504
295.2278683	31.509691852
313.2384331	66.00682114
41.00328823	5.8149252379
43.01893830	2.455403902
44.99820284	2.194421713
56.99820284	1.546730876
59.01385291	26.459061246
61.02950297	4.143839051
69.07097387	0.9808436986
71.08662393	12.713959511
73.02950298	2.124568044
81.07097387	1.135520281
83.08662393	5.0463043533
97.06588849 1.054327477
99.08153855	12.818156792

NAME: 12_13-epOME
PRECURSORMZ: 295.2278683
PRECURSORTYPE: [M-H]-
FORMULA:
Ontology:
INCHIKEY:
SMILES: CCCCCC1OC1CC=CCCCCCCCC(=O)[O-]
RETENTIONTIME:
CCS:
IONMODE: Negative
COLLISIONENERGY: 30HCD
Comment:
Num Peaks: 50
101.0971886	0.995530082
109.0658885	1.152551879
111.0815386	6.4581586016
113.0971886	3.4198853891
125.0971886	0.6677958062
127.1128387	0.8798168876
149.1335741	0.9583926896
151.1492241	1.250001242
165.1284886	2.5812390642
167.1441388	2.4157293621
17.00328822	1.18887773
177.1284886	2.4238806503
179.1441388	6.6537106435
181.1597889	1.755169389
183.1390533	3.289437259
193.1234034	4.3588909474
195.1390533	8.603926641
197.1547035	2.956517829
199.1703536	1.4132321246
201.1860035	0.4303911914
205.1234034	1.16001091
207.1390533	2.547753204
211.1339680	3.897846084
213.1496181	0.7888009427
223.1339680	2.9029114589
225.1496181	0.6912234918
233.2274745	0.7863720577
247.2067390	0.739741071
249.2223890	2.6737991671
251.2380392	20.418574166
259.2067390	1.3258941025
277.2173037	33.48702891
279.1965683	0.9618696329
295.2278683	74.58949904
41.00328823	23.4707664808
43.01893830	6.898643097
44.99820284	2.9840940895
55.01893830	3.299659146
59.01385291	22.327284629
69.07097387	0.8551513899
71.08662393	6.366995324
77.03967373	0.4303911914
79.05532376	0.4311032049
81.07097387	4.8413514513
83.08662393	12.450787799
85.10227394	3.2980431782
93.03458836	1.418928838
95.05023841	2.120406462
97.06588849 1.383707587
99.08153855	6.598226482

NAME: 13-HODE
PRECURSORMZ: 295.2278683
PRECURSORTYPE: [M-H]-
FORMULA:
Ontology:
INCHIKEY:
SMILES: CCCCCC([O-])C=CC=CCCCCCCCC(=O)O
RETENTIONTIME:
CCS:
IONMODE: Negative
COLLISIONENERGY: 30HCD
Comment:
Num Peaks: 44
101.0971886	2.9901177476
111.0815386	3.2245423287
113.0971886	3.7248838168
115.1128387	3.0403273252
125.0971886	1.38192393
139.1128387	1.9284396737
141.1284886	0.1658337059
149.1335741	2.2128942157
151.1128387	1.38192393
151.1492241	0.8242241334
157.1234034	0.1305403247
17.00328822	0.1570390836
177.1284886	4.0635941681
179.1441388	5.1689959973
181.1597889	1.278870434
193.1234034	0.211761802
193.1597889	1.588218744
195.1390533	3.982166622
205.1234034	1.473673931
207.1390533	3.3782251349
221.1547035	2.188361538
223.1339680	1.1968713733
225.1496181	0.712804932
231.2118244	1.0446051462
233.2274745	13.75199165
235.2067390	2.6449696462
239.1652682	0.4433554416
247.2067390	2.4015476102
249.2223890	4.7444038886
251.2380392	18.004860012
259.2067390	5.3138598345
267.1965683	0.1383987813
277.2173037	51.336781546
295.2278683	77.80279005
41.00328823	12.366087055
43.01893830	3.7728559602
44.99820284	4.6633010566
55.05532376	1.365800807
59.01385291	28.938548239
69.07097387	2.0986922149
71.08662393	12.724134475
83.08662393	1.80303105
97.06588849 2.134538791
99.08153855	6.0992118482

NAME: 13-oxoODE
PRECURSORMZ: 293.2122183
PRECURSORTYPE: [M-H]-
FORMULA:
Ontology:
INCHIKEY:
SMILES: CCCCCC(=O)C=CC=CCCCCCCCC(=O)[O-]
RETENTIONTIME:
CCS:
IONMODE: Negative
COLLISIONENERGY: 30HCD
Comment:
Num Peaks: 44
109.0658885	2.2716719304
111.0815386	3.9037140327
113.0971886	1.6354917827
125.0971886	1.081178175
139.1128387	0.2229644758
147.1179241	0.7006684504
149.1335741	3.7266210212
151.1128387	1.081178175
151.1492241	5.6340680731
157.1234034	0.1466343927
165.1284886	1.067530815
17.00328822	0.2040490891
177.1284886	6.5516617874
179.1441388	2.6184458521
189.1284886	1.168640243
191.1441388	8.3327612594
193.1234034	1.3762634609
193.1597889	6.6744341594
195.1390533	12.227770189
217.1234034	1.201522812
219.1390533	4.233570102
221.1183179	3.9239067215
223.1339680	1.6337864103
233.1910890	1.8450313149
235.1339680	5.1045149466
237.1496181	8.187068519
241.1809182	0.8175994733
243.1965683	0.7234432995
245.1910890	2.1433990737
247.2067390	2.4425047112
249.2223890	24.497924475
265.1809182	0.2290924188
275.2016537	11.412137747
277.1809182	0.1458036397
293.2122183	89.54350422
41.00328823	8.459211766
43.01893830	2.724075847
44.99820284	5.0508511825
55.05532376	1.3863908301
57.07097387	4.0741179149
59.01385291	34.980862602
71.08662393	7.956254796
97.06588849 10.43669318
99.08153855	6.220984644

NAME: 15-HETE
PRECURSORMZ: 319.2278683
PRECURSORTYPE: [M-H]-
FORMULA:
Ontology:
INCHIKEY:
SMILES: CCCCCC([O-])C=CC=CCC=CCC=CCCCC(=O)O
RETENTIONTIME:
CCS:
IONMODE: Negative
COLLISIONENERGY: 30HCD
Comment:
Num Peaks: 49
101.0608031	0.1448478127
101.0971886	2.9934110111
111.0815386	2.4739709065
113.0971886	3.7874323893
115.1128387	3.1414142202
141.0921032	0.1448478127
141.1284886	0.1827688795
17.00328822	0.1730761379
173.1335741	2.0851443651
175.1492241	2.8040433506
181.1234034	0.1448478127
181.1597889	0.1827688795
201.1284886	2.0308465817
203.1441388	4.4211559863
205.1234034	0.5106334593
205.1597889	1.691452896
217.1234034	0.7416547045
217.1597889	1.573523414
219.1390533	5.247884093
219.1754388	1.524485975
221.1910890	0.1827688795
229.1234034	1.499504758
231.1390533	1.992754204
245.1547035	2.3592266342
247.1339680	1.4266094548
249.1496181	0.9160130988
255.2118244	1.1839954777
257.2274745	15.486787077
259.2067390	3.0658026687
261.1496181	0.5258005842
263.1652682	0.5756305174
271.2067390	2.6438927686
273.2223890	5.0914274643
275.2380392	21.02178298
283.2067390	1.2236244028
291.1965683	0.1543911099
301.2173037	31.721402047
319.2278683	92.21489602
41.00328823	7.67217922
43.01893830	3.68594698
44.99820284	5.0636534104
55.05532376	1.446501124
59.01385291	36.041204531
69.07097387	2.3068645575
71.08662393	13.495898061
83.08662393	1.915790611
97.06588849 1.589672386
97.10227394	1.280240133
99.08153855	6.2155281525

NAME: 5-HETE
PRECURSORMZ: 319.2278683
PRECURSORTYPE: [M-H]-
FORMULA:
Ontology:
INCHIKEY:
SMILES: CCCCCC=CCC=CCC=CC=CC([O-])CCCC(=O)O
RETENTIONTIME:
CCS:
IONMODE: Negative
COLLISIONENERGY: 30HCD
Comment:
Num Peaks: 51
111.045153	1.283436221
113.0608031	2.4545410813
115.0400676	1.4153866503
117.0557177	0.9145500211
125.1335741	0.1826052001
127.0400676	0.5935147514
129.0557177	1.0181620353
131.0713677	1.3292762019
157.0870179	0.1826052001
163.1492241	1.206310205
165.1648743	0.1826052001
17.00328822	0.1729211389
187.1492241	1.673081668
189.1648743	2.7202081835
191.1805243	0.5100006146
197.1183179	0.1826052001
201.1648743	0.8678162269
203.1805243	13.330246805
213.1648743	1.367850466
215.1805243	2.18108082
229.1597889	1.594886316
229.1961743	1.615518361
231.1754388	6.3595822955
233.1910890	3.1558233708
235.1339680	1.206310205
237.1496181	0.1826052001
243.1754388	1.440113612
245.1910890	2.6072904883
247.2067390	0.690556358
255.2118244	1.1819294375
257.2274745	15.727266004
259.2067390	3.1794548832
271.2067390	2.6500107807
273.2223890	5.0939558496
275.2380392	21.235635613
283.2067390	1.227832111
291.1965683	0.1542446402
301.2173037	31.695525183
319.2278683	92.09535957
41.00328823	8.003918063
41.03967373	3.365400714
43.01893830	2.995433076
43.05532376	3.6907554055
44.99820284	5.0787954709
59.01385291	34.699091647
69.03458836	2.0886426779
71.05023841	4.1813719339
85.02950298	0.2320934539
85.10227394	0.1826052001
87.04515304	6.622941951
99.04515304	1.996246249

NAME: 7_17-diHDOPE
PRECURSORMZ: 361.2384331
PRECURSORTYPE: [M-H]-
FORMULA:
Ontology:
INCHIKEY:
SMILES: CCC=CCC(O)C=CC=CCC=CC=CC(O)CCCCCC(=O)[O-]
RETENTIONTIME:
CCS:
IONMODE: Negative
COLLISIONENERGY: 30HCD
Comment:
Num Peaks: 47
109.0658885	1.432614398
111.0815386	3.4347431725
113.0608031	0.1967032302
113.0971886	1.4507295433
115.0764532	3.527197379
127.0764532	2.069104577
141.0921032	1.460989624
143.0713677	1.0800863103
145.0870179	0.22944541
157.0870179	0.182712316
159.1026679	0.9166352883
199.1492241	3.6295946286
203.1441388	1.326401778
217.1597889	7.757785823
227.1441388	1.733512279
229.1597889	2.786168657
243.1390533	1.342504857
243.1754388	1.45007741
245.1547035	8.612801431
247.1703536	4.8214865552
259.1703536	1.56968879
261.1860035	1.564286911
263.1652682	2.618662093
275.1652682	3.6410474031
289.1809182	2.5739917464
291.1601827	0.9504246607
293.1758328	0.1920054009
297.2223890	1.3881866561
299.2380392	13.668058793
301.2173037	1.848973895
313.2173037	2.0542303194
315.2329538	4.9256876871
317.2486038	14.767763469
325.2173037	11.7148630831
333.207133	0.183032757
343.2278683	53.715674464
361.2384331	62.85409036
41.00328823	10.501033551
43.01893830	2.696506723
44.99820284	3.9660504354
59.01385291	28.007068921
67.05532376	0.1980314028
69.07097387	11.899888092
71.08662393	0.580160263
81.07097387	1.542349757
97.06588849 7.1234716159
99.08153855	3.8134760868

NAME: 8-HETE
PRECURSORMZ: 319.2278683
PRECURSORTYPE: [M-H]-
FORMULA:
Ontology:
INCHIKEY:
SMILES: CCCCCC=CCC=CC=CC([O-])CC=CCCCC(=O)O
RETENTIONTIME:
CCS:
IONMODE: Negative
COLLISIONENERGY: 30HCD
Comment:
Num Peaks: 50
101.0608031	0.1446812236
109.0658885	1.9039754041
111.0815386	2.663425367
125.0608031	0.7402602677
125.1335741	0.1825794759
127.0764532	6.475905036
139.0764532	1.995352561
147.1179241	1.671798652
149.1335741	2.696455314
151.0764532	1.282861647
151.1492241	0.5100781296
153.0921032	2.4549746957
155.0713677	1.4145580934
157.0870179	0.9136205293
161.1335741	0.8678763975
163.1492241	13.271949551
167.0713677	0.5934370594
169.0870179	1.0177586301
17.00328822	0.1728967789
171.1026679	1.3281923965
173.1335741	1.367238101
175.1492241	2.180104385
189.1284886	1.795809254
189.1648743	1.614795119
191.1441388	5.3510016313
193.1597889	3.1027019485
195.1026679	1.204970288
197.1183179	0.1825794759
203.1441388	1.438599577
205.1597889	2.7023965305
207.1754388	1.9679886263
221.1910890	0.1825794759
237.1496181	0.1825794759
255.2118244	1.1940755622
257.2274745	15.553707004
259.2067390	3.0869160597
271.2067390	2.6481530193
273.2223890	6.6080544626
275.2380392	21.018012905
283.2067390	1.2299336846
291.1965683	0.154199738
301.2173037	31.675428712
319.2278683	91.95207055
41.00328823	8.000334837
43.01893830	2.994092069
44.99820284	5.0747297822
59.01385291	36.070259409
81.07097387	2.9910371557
83.08662393	3.9904344699
85.10227394	0.1825794759

NAME: 9-HODE
PRECURSORMZ: 295.2278683
PRECURSORTYPE: [M-H]-
FORMULA:
Ontology:
INCHIKEY:
SMILES: CCCCCC=CC=CC(O)CCCCCCCC(=O)[O-]
RETENTIONTIME:
CCS:
IONMODE: Negative
COLLISIONENERGY: 30HCD
Comment:
Num Peaks: 45
107.0866239	1.492017188
109.1022739	2.7773586502
121.1022739	2.164339942
123.1179241	12.707373635
125.0971886	3.9676320919
127.1128387	4.402866786
133.1022739	1.143799243
135.1179241	2.094197655
141.0921032	0.2120621587
143.1077533	3.99712065
149.0971886	1.603947757
149.1335741	1.554830662
151.1128387	6.0061804009
153.0921032	1.410301226
153.1284886	3.1363153579
155.1077533	3.43964361
163.1128387	1.448295702
165.1284886	2.6948820294
167.1077533	1.544016532
167.1441388	1.9912750561
169.1234034	1.358051512
17.00328822	0.1833689296
171.1026679	1.1975456267
173.1183179	0.7157951288
183.1026679	0.4952595466
185.1183179	0.7985004092
187.1339680	1.3111279836
231.2118244	1.0493987519
233.2274745	13.858989251
235.2067390	2.2424617017
247.2067390	2.4467823262
249.2223890	4.8100033424
251.2380392	18.119593824
259.2067390	5.3640678258
267.1965683	0.138585802
277.2173037	51.379174771
295.2278683	78.00176771
41.00328823	12.8407337238
43.01893830	2.624755389
44.99820284	4.7585630704
59.01385291	31.139293129
83.08662393	1.548949713
85.10227394	0.1660702069
97.10227394	2.8339333891
99.11792406	0.8287706067

NAME: 9_10-diHOME
PRECURSORMZ: 313.2384331
PRECURSORTYPE: [M-H]-
FORMULA:
Ontology:
INCHIKEY:
SMILES: CCCCCC=CCC([O-])C(O)CCCCCCCC(=O)O
RETENTIONTIME:
CCS:
IONMODE: Negative
COLLISIONENERGY: 30HCD
Comment:
Num Peaks: 45
109.1022739	0.9509149955
111.1179241	12.614088934
121.1022739	1.105724725
123.1179241	4.8229853757
125.0971886	3.840984176
127.1128387	4.0777702148
129.1284886	3.1221213363
137.0971886	1.028213321
139.1128387	12.56987487
141.0921032	0.7995658252
141.1284886	10.87846307
143.1077533	6.170498665
151.1128387	2.363062959
153.0921032	2.4005683757
153.1284886	4.2232739861
155.1077533	7.5000137877
157.1234034	6.2196836043
167.1077533	0.921988813
169.1234034	8.1378973208
171.1026679	8.486969299
171.1390533	4.0605074492
173.1183179	6.771781468
183.1026679	2.795124528
185.1183179	5.7057371789
201.1132326	4.3528685338
203.1288826	1.6296192339
231.1601828	0.1601029754
251.2380392	6.280316521
267.2329538	1.6875890373
269.2486038	12.681426571
277.2173037	4.157417004
285.207133	0.1984766785
295.2278683	31.32092687
297.207133	0.9796660531
313.2384331	65.79856887
41.00328823	5.9585995933
43.01893830	2.364257764
44.99820284	2.132375058
56.99820284	2.189115796
59.01385291	28.088110539
61.02950297	4.46073386
73.02950298	2.145846237
85.10227394	0.1601029754
97.10227394	0.8391200492
99.11792406	0.8469454992

NAME: 9_10-epOME
PRECURSORMZ: 295.2278683
PRECURSORTYPE: [M-H]-
FORMULA:
Ontology:
INCHIKEY:
SMILES: CCCCCC=CCC1OC1CCCCCCCC(=O)[O-]
RETENTIONTIME:
CCS:
IONMODE: Negative
COLLISIONENERGY: 30HCD
Comment:
Num Peaks: 47
109.1022739	2.0798369681
111.1179241	8.754947947
119.0866239	0.4266866237
121.1022739	4.6821652939
123.1179241	12.245797022
125.0971886	2.2221606976
125.1335741	4.2017332227
127.1128387	1.8203331668
127.1492242	1.8011623181
135.0815385	1.866000255
137.0971886	3.5232047118
139.1128387	11.186736354
141.1284886	2.925529917
143.1077533	3.1956377042
143.1441388	1.447152617
149.0971886	0.8715216689
151.0764532	0.4307498451
151.1128387	5.8645220842
153.0921032	4.3886128816
153.1284886	3.7747068467
155.1077533	8.35590314
157.1234034	2.8375762086
159.1390533	1.1748750002
165.0921032	1.066134643
165.1284886	0.6779004563
167.1077533	2.306375477
167.1441388	0.877467358
17.00328822	1.238268972
171.1026679	3.7819488633
173.1183179	0.7807248411
183.1026679	2.7548059569
185.1183179	0.984900006
199.1339680	0.6163367171
233.2274745	0.7965434866
235.2067390	0.5854039417
247.2067390	0.7321167485
249.2223890	2.6605865903
251.2380392	20.805085753
259.2067390	1.4650759802
277.2173037	35.0551106
279.1965683	0.8875570313
295.2278683	73.83063044
41.00328823	23.0270203629
43.01893830	6.890885203
44.99820284	2.8090418442
55.01893830	3.454594849
59.01385291	21.837931378

NAME: 9_oxoHODE
PRECURSORMZ: 293.2122183
PRECURSORTYPE: [M-H]-
FORMULA:
Ontology:
INCHIKEY:
SMILES: CCCCCC=CC=CC(=O)CCCCCCCC(=O)[O-]
RETENTIONTIME:
CCS:
IONMODE: Negative
COLLISIONENERGY: 30HCD
Comment:
Num Peaks: 46
107.0866239	1.455097502
109.1022739	1.5049008594
119.0866239	1.204296767
121.1022739	5.4174060478
123.1179241	23.108089725
125.0971886	5.7340522613
127.0764532	0.1777954872
127.1128387	2.1815040488
129.0921032	1.4174306643
143.1077533	3.1155608261
147.0815385	1.360615035
147.1179241	1.475343129
149.0971886	8.285181187
151.1128387	3.8113525375
161.0971886	5.501529341
163.1128387	11.1463394988
165.0921032	0.9702910104
165.1284886	16.32174944
167.1077533	1.9596799343
169.0870179	5.776439037
169.1597889	0.8172838868
17.00328822	0.2039580755
171.1026679	3.778552604
171.1754388	0.7535562065
183.1026679	1.0018017445
185.1183179	1.1702901213
211.1339680	0.1847170067
233.1910890	2.5118754695
245.1910890	2.1678811269
247.2067390	3.4662707513
249.2223890	24.852808682
265.1809182	0.2289902349
275.2016537	11.477544039
277.1809182	0.1457388107
293.2122183	89.39779309
41.00328823	10.0723311076
43.01893830	2.30799788
43.05532376	1.085850403
44.99820284	3.8405385394
57.07097387	1.085850403
59.01385291	28.658264919
71.08662393	1.085850403
83.08662393	2.9057999726
85.10227394	0.2323584676
97.10227394	2.7130105603
99.11792406	1.9284311523
