# Supplementary material for: Viral Infection Leads to a Unique Suite of Allelopathic Chemical Signals in Three Diatom Host–Virus Pairs
Source: Mar Drugs. 2024 May 17;22(5):228. doi: 10.3390/md22050228 (PMC11123003; doi:10.3390/md22050228)
Supplement: Supplementary file 1 [file marinedrugs-22-00228-s001.zip › Supplemental Table S2 Annotation Table for CT DNAV March 2024.xlsx]

## Sheet: Sheet12
Supplemental Table 2a. Functional group annotations of features annotated as small (<C14) fatty acids and non-volatile oxylipins in C. tenuissimus + DNA virus experiments. The retention times of authentic standards (RT auth) were used to predict retention times for the observed structural isomers. The difference in carbon number and difference in double bond equivalents was calculated for each ob…
Observed					Standard					Calculation				Proposed Functional Group Annotation
Structural Annotation				RT obs	Structural Annotation				RT auth			RT calc	RT obs - RT calc
	#C	#DB	#O		Name	#C	#DB	#O		dC	dDB			Name	Abbrev.
NVO 14:0 +1O RT-3.1	14	0	1O	3.1	9-HOTrE	18	3	1O	4.02	-4	-3	2.52	0.58
NVO 14:0 +1O RT-5.3	14	0	1O	5.3	9-HOTrE	18	3	1O	4.02	-4	-3	2.52	2.78
NVO 14:0 +1O RT-6.5	14	0	1O	6.5	9-HOTrE	18	3	1O	4.02	-4	-3	2.52	3.98
NVO 14:0 +2O RT-2.9	14	0	2O	2.9	9-HpODE	18	2	2O	5.44	-4	-2	3.04	-0.14	Hydroperoxy Tetradecanoic acid (3b)	HpTE (3b)
NVO 14:0 +3O RT-1.5	14	0	3O	1.5	5,6,15-TriHEPE	20	5	3O	1.72	-6	-5	-0.08	1.58
NVO 14:0 +3O RT-2	14	0	3O	2	5,6,15-TriHEPE	20	5	3O	1.72	-6	-5	-0.08	2.08
NVO 14:0 +3O RT-2.5	14	0	3O	2.5	5,6,15-TriHEPE	20	5	3O	1.72	-6	-5	-0.08	2.58
NVO 14:1 +1O RT-2.9	14	1	1O	2.9	9-HOTrE	18	3	1O	4.02	-4	-2	1.62	1.28
NVO 14:1 +2O RT-2.3	14	1	2O	2.3	9-HpODE	18	2	2O	5.44	-4	-1	2.14	0.16	Hydroperoxy Tetradecaenoic acid (3b)	HpTME (3b)
NVO 14:1 +2O RT-3.7	14	1	2O	3.7	9-HpODE	18	2	2O	5.44	-4	-1	2.14	1.56
NVO 14:1 +3O RT-1.6	14	1	3O	1.6	5,6,15-TriHEPE	20	5	3O	1.72	-6	-4	-0.98	2.58
FFA 14:1 RT-7.7	14	1		7.7	AA	20	4		8.1	-6	-3	4.5	3.2
NVO 14:2 +1O RT-1.7	14	2	1O	1.7	9-HOTrE	18	3	1O	4.02	-4	-1	0.72	0.98
NVO 14:2 +1O RT-2.5	14	2	1O	2.5	9-HOTrE	18	3	1O	4.02	-4	-1	0.72	1.78
NVO 14:2 +1O RT-3.1	14	2	1O	3.1	9-HOTrE	18	3	1O	4.02	-4	-1	0.72	2.38
NVO 14:2 +1O RT-4	14	2	1O	4	9-HOTrE	18	3	1O	4.02	-4	-1	0.72	3.28
NVO 14:2 +1O RT-4.3	14	2	1O	4.3	9-HOTrE	18	3	1O	4.02	-4	-1	0.72	3.58
NVO 14:2 +1O RT-4.9	14	2	1O	4.9	9-HOTrE	18	3	1O	4.02	-4	-1	0.72	4.18
NVO 14:2 +2O RT-1.9	14	2	2O	1.9	9-HpODE	18	2	2O	5.44	-4	0	1.24	0.66
NVO 14:2 +2O RT-2.6	14	2	2O	2.6	9-HpODE	18	2	2O	5.44	-4	0	1.24	1.36
NVO 14:2 +2O RT-3	14	2	2O	3	9-HpODE	18	2	2O	5.44	-4	0	1.24	1.76
NVO 14:2 +3O RT-1.5	14	2	3O	1.5	5,6,15-TriHEPE	20	5	3O	1.72	-6	-3	-1.88	3.38
FFA 14:2 RT-6.3	14	2		6.3	AA	20	4		8.1	-6	-2	3.6	2.7
FFA 14:2 RT-6.5	14	2		6.5	AA	20	4		8.1	-6	-2	3.6	2.9
Supplemental Table 2b. Functional group annotations of features annotated as C16 fatty acids and non-volatile oxylipins. The retention times of authentic standards (RT auth) were used to predict retention times for the observed structural isomers. The difference in carbon number and difference in double bond equivalents was calculated for each observed strucutral isomer and the corresponding auth…
Observed					Standard					Calculation				Proposed Functional Group Annotation
Structural Annotation				RT obs	Structural Annotation				RT auth			RT calc	RT obs - RT calc
	#C	#DB	#O		Name	#C	#DB	#O		dC	dDB			Name	Abbrev.
NVO 16:0 +1O RT-7.7	16	0	1O	7.7	9-HOTrE	18	3	1O	4.02	-2	-3	4.62	3.08
NVO 16:0 +2O RT-2.6	16	0	2O	2.6	9-HpODE	18	2	2O	5.44	-2	-2	5.14	-2.54	Dihydroxy hexadecanoic acid (3b)	diHHA (3b)
					5,6-diHETE	20	4	2O	3.48	-4	-4	2.88	-0.28
					14,15-diHETE	20	4	2O	3	-4	-4	2.4	0.2
					5,12-diHETE	20	4	2O	2.89	-4	-4	2.29	0.31
NVO 16:0 +2O RT-3.2	16	0		3.2	9-HpODE	18	2	2O	5.44	-2	-2	5.14	-1.94	Dihydroxy hexadecanoic acid (3b)	diHHA (3b)
					5,6-diHETE	20	4	2O	3.48	-4	-4	2.88	0.32
					14,15-diHETE	20	4	2O	3	-4	-4	2.4	0.8
					5,12-diHETE	20	4	2O	2.89	-4	-4	2.29	0.91
NVO 16:0 +2O RT-6.5	16	0	2O	6.5	9-HpODE	18	2	2O	5.44	-2	-2	5.14	1.36
					5,6-diHETE	20	4	2O	3.48	-4	-4	2.88	3.62
					14,15-diHETE	20	4	2O	3	-4	-4	2.4	4.1
					5,12-diHETE	20	4	2O	2.89	-4	-4	2.29	4.21
NVO 16:0 +3O RT-1.8	16	0	3O	1.8	5,6,15-TriHEPE	20	5	3O	1.72	-4	-5	2.02	-0.22	Trihydroxy Hexadecanoic acid (3b)	triHHA (3b)
NVO 16:0 +3O RT-3	16	0	3O	3	5,6,15-TriHEPE	20	5	3O	1.72	-4	-5	2.02	0.98
NVO 16:1 +1O RT-4.4	16	1	1O	4.4	9-HOTrE	18	3	1O	4.02	-2	-2	3.72	0.68
NVO 16:1 +1O RT-6.3	16	1	1O	6.3	9-HOTrE	18	3	1O	4.02	-2	-2	3.72	2.58
NVO 16:1 +2O RT-2.6	16	1	2O	2.6	9-HpODE	18	2	2O	5.44	-2	-1	4.24	-1.64
					5,6-diHETE	20	4	2O	3.48	-4	-3	1.98	0.62
					14,15-diHETE	20	4	2O	3	-4	-3	1.5	1.1
					5,12-diHETE	20	4	2O	2.89	-4	-3	1.39	1.21
NVO 16:1 +3O RT-1.6	16	1	3O	1.6	5,6,15-TriHEPE	20	5	3O	1.72	-4	-4	1.12	0.48	Trihydroxy Hexadecaenoic acid (3b)	triHME (3b)
NVO 16:2 +1O RT-2.2	16	2	1O	2.2	9-HOTrE	18	3	1O	4.02	-2	-1	2.82	-0.62
NVO 16:2 +1O RT-3.5	16	2	1O	3.5	9-HpODE	18	2	2O	5.44	-2	0	3.34	0.16	Hydroxy hexadecadienoic acid (3b)	HHDE (3b)
NVO 16:2 +1O RT-4.3	16	2	1O	4.3	9-HpODE	18	2	2O	5.44	-2	0	3.34	0.96
NVO 16:2 +1O RT-4.8	16	2	1O	4.8	9-HpODE	18	2	2O	5.44	-2	0	3.34	1.46
NVO 16:2 +2O RT-1.6	16	2	2O	1.6	9-HpODE	18	2	2O	5.44	-2	0	3.34	-1.74	Dihydroxy hexadecadienoic acid (3b)	diHHDE (3b)
					5,6-diHETE	20	4	2O	3.48	-4	-2	1.08	0.52
					14,15-diHETE	20	4	2O	3	-4	-2	0.6	1
					5,12-diHETE	20	4	2O	2.89	-4	-2	0.49	1.11
NVO 16:2 +2O RT-2.1	16	2	2O	2.1	9-HpODE	18	2	2O	5.44	-2	0	3.34	-1.24
					5,6-diHETE	20	4	2O	3.48	-4	-2	1.08	1.02
					14,15-diHETE	20	4	2O	3	-4	-2	0.6	1.5
					5,12-diHETE	20	4	2O	2.89	-4	-2	0.49	1.61
NVO 16:2 +2O RT-2.5	16	2	2O	2.5	9-HpODE	18	2	2O	5.44	-2	0	3.34	-0.84
					5,6-diHETE	20	4	2O	3.48	-4	-2	1.08	1.42
					14,15-diHETE	20	4	2O	3	-4	-2	0.6	1.9
					5,12-diHETE	20	4	2O	2.89	-4	-2	0.49	2.01
NVO 16:2 +2O RT-3.4	16	2	2O	3.4	9-HpODE	18	2	2O	5.44	-2	0	3.34	0.06	Hydroperoxy hexadecadienoic acid (3b)	HpHDE (3b)
					5,6-diHETE	20	4	2O	3.48	-4	-2	1.08	2.32
					14,15-diHETE	20	4	2O	3	-4	-2	0.6	2.8
					5,12-diHETE	20	4	2O	2.89	-4	-2	0.49	2.91
NVO 16:2 +2O RT-3.9	16	2	2O	3.9	9-HpODE	18	2	2O	5.44	-2	0	3.34	0.56
					5,6-diHETE	20	4	2O	3.48	-4	-2	1.08	2.82
					14,15-diHETE	20	4	2O	3	-4	-2	0.6	3.3
					5,12-diHETE	20	4	2O	2.89	-4	-2	0.49	3.41
NVO 16:2 +3O RT-1.6	16	2	3O	1.6	5,6,15-TriHEPE	20	5	3O	1.72	-4	-3	0.22	1.38
NVO 16:2 +3O RT-2	16	2	2O	2	5,6,15-TriHEPE	20	5	3O	1.72	-4	-3	0.22	1.78
FFA 16:2 RT-4.8	16	2		4.8	AA	20	4		8.1	-4	-2	5.7	-0.9	Hexadecadienoic acid (3b)	HDE (3b)
					DHA	22	6		7.7	-6	-4	5	-0.2
FFA 16:2 RT-5.4	16	2		5.4	AA	20	4		8.1	-4	-2	5.7	-0.3	Hexadecadienoic acid (3b)	HDE (3b)
					DHA	22	6		7.7	-6	-4	5	0.4
FFA 16:2 RT-5.8	16	2		5.8	AA	20	4		8.1	-4	-2	5.7	0.1	Hexadecadienoic acid (3b)	HDE (3b)
					DHA	22	6		7.7	-6	-4	5	0.8
FFA 16:2 RT-8.2	16	2		8.2	AA	20	4		8.1	-4	-2	5.7	2.5
					DHA	22	6		7.7	-6	-4	5	3.2
NVO 16:3 +1O RT-2	16	3	1O	2	9-HOTrE	18	3	1O	4.02	-2	0	1.92	0.08	Hydroxy Hexadecatrienoic acid (3b)	HHTrE (3b)
NVO 16:3 +1O RT-3	16	3	1O	3	9-HOTrE	18	3	1O	4.02	-2	0	1.92	1.08
					15-HETrE	20	3	1O	6.11	-4	0	1.91	1.09
					15-HETE	20	4	1O	5.43	-4	-1	2.13	0.87
					15-KETE	20	5	1O	5.24	-4	-2	2.84	0.16
NVO 16:3 +1O RT-3.8	16	3	1O	3.8	9-HOTrE	18	3	1O	4.02	-2	0	1.92	1.88
NVO 16:3 +2O RT-2.1	16	3	2O	2.1	9-HpOTrE	18	3	2O	4.28	-2	0	2.18	-0.08	Hydroperoxy hexadecatrienoic acid (3b)	HpHTrE (3b)
					13-HpTrE	18	3	2O	4.65	-2	0	2.55	-0.45
					5,6-diHETE	20	4	2O	3.48	-4	-1	0.18	1.92
					14,15-diHETE	20	4	2O	3	-4	-1	-0.3	2.4
					5,12-diHETE	20	4	2O	2.89	-4	-1	-0.41	2.51
NVO 16:3 +2O RT-2.9	16	3	2O	2.9	9-HpOTrE	18	3	2O	4.28	-2	0	2.18	0.72	Hydroperoxy hexadecatrienoic acid (3b)	HpHTrE (3b)
					13-HpTrE	18	3	2O	4.65	-2	0	2.55	0.35
					5,6-diHETE	20	4	2O	3.48	-4	-1	0.18	2.72
					14,15-diHETE	20	4	2O	3	-4	-1	-0.3	3.2
					5,12-diHETE	20	4	2O	2.89	-4	-1	-0.41	3.31
NVO 16:3 +2O RT-3.2	16	3	2O	3.2	9-HpOTrE	18	3	2O	4.28	-2	0	2.18	1.02
					13-HpTrE	18	3	2O	4.65	-2	0	2.55	0.65
					5,6-diHETE	20	4	2O	3.48	-4	-1	0.18	3.02
					14,15-diHETE	20	4	2O	3	-4	-1	-0.3	3.5
					5,12-diHETE	20	4	2O	2.89	-4	-1	-0.41	3.61
NVO 16:3 +2O RT-3.9	16	3	2O	3.9	9-HpOTrE	18	3	2O	4.28	-2	0	2.18	1.72
					13-HpTrE	18	3	2O	4.65	-2	0	2.55	1.35
					5,6-diHETE	20	4	2O	3.48	-4	-1	0.18	3.72
					14,15-diHETE	20	4	2O	3	-4	-1	-0.3	4.2
					5,12-diHETE	20	4	2O	2.89	-4	-1	-0.41	4.31
NVO 16:3 +2O RT-7	16	3	3O	7	9-HpOTrE	18	3	2O	4.28	-2	0	2.18	4.82
					13-HpTrE	18	3	2O	4.65	-2	0	2.55	4.45
					5,6-diHETE	20	4	2O	3.48	-4	-1	0.18	6.82
					14,15-diHETE	20	4	2O	3	-4	-1	-0.3	7.3
					5,12-diHETE	20	4	2O	2.89	-4	-1	-0.41	7.41
NVO 16:3 +3O RT-1.5	16	3	3O	1.5	5,6,15-TriHEPE	20	5	3O	1.72	-4	-2	-0.68	2.18
NVO 16:3 +3O RT-2.1	16	3	3O	2.1	5,6,15-TriHEPE	20	5	3O	1.72	-4	-2	-0.68	2.78
NVO 16:3 +3O RT-3.8	16	3	3O	3.8	5,6,15-TriHEPE	20	5	3O	1.72	-4	-2	-0.68	4.48
FFA 16:3 RT-2.2	16	3		2.2	AA	20	4		8.1	-4	-1	4.8	-2.6
					DHA	22	6		7.7	-6	-3	4.1	-1.9
FFA 16:3 RT-2.8	16	3		2.8	AA	20	4		8.1	-4	-1	4.8	-2
					DHA	22	6		7.7	-6	-3	4.1	-1.3
FFA 16:3 RT-3.5	16	3		1.8	AA	20	4		8.1	-4	-1	4.8	-3
					DHA	22	6		7.7	-6	-3	4.1	-2.3
FFA 16:3 RT-4.2	16	3		4.2	AA	20	4		8.1	-4	-1	4.8	-0.6	Hexadecatrienoic acid (3b)	HTrE (3b)
					DHA	22	6		7.7	-6	-3	4.1	0.1
FFA 16:3 RT-5.3	16	3		5.3	AA	20	4		8.1	-4	-1	4.8	0.5	Hexadecatrienoic acid (3b)	HTrE (3b)
					DHA	22	6		7.7	-6	-3	4.1	1.2
FFA 16:3 RT-6.7	16	3		6.7	AA	20	4		8.1	-4	-1	4.8	1.9
					DHA	22	6		7.7	-6	-3	4.1	2.6
FFA 16:3 RT-7.3	16	3		7.3	AA	20	4		8.1	-4	-1	4.8	2.5
					DHA	22	6		7.7	-6	-3	4.1	3.2
FFA 16:3 RT-8.7	16	3		8.7	AA	20	4		8.1	-4	-1	4.8	3.9
					DHA	22	6		7.7	-6	-3	4.1	4.6
NVO 16:4 +1O RT-1.8	16	4	1O	1.8	9-HOTrE	18	3	1O	4.02	-2	1	1.02	0.78
					15-HETrE	20	3	1O	6.11	-4	1	1.01	0.79
					15-HETE	20	4	1O	5.43	-4	0	1.23	0.57
					15-KETE	20	5	1O	5.24	-4	-1	1.94	-0.14
NVO 16:4 +1O RT-2	16	4	1O	2	9-HOTrE	18	3	1O	4.02	-2	1	1.02	0.98
					15-HETrE	20	3	1O	6.11	-4	1	1.01	0.99
					15-HETE	20	4	1O	5.43	-4	0	1.23	0.77
					15-KETE	20	5	1O	5.24	-4	-1	1.94	0.06
NVO 16:4 +1O RT-2.5	16	4	1O	2.5	9-HOTrE	18	3	1O	4.02	-2	1	1.02	1.48
					15-HETrE	20	3	1O	6.11	-4	1	1.01	1.49
					15-HETE	20	4	1O	5.43	-4	0	1.23	1.27
					15-KETE	20	5	1O	5.24	-4	-1	1.94	0.56
NVO 16:4 +1O RT-2.9	16	4	1O	2.9	9-HOTrE	18	3	1O	4.02	-2	1	1.02	1.88
					15-HETrE	20	3	1O	6.11	-4	1	1.01	1.89
					15-HETE	20	4	1O	5.43	-4	0	1.23	1.67
					15-KETE	20	5	1O	5.24	-4	-1	1.94	0.96
NVO 16:4 +1O RT-3.2	16	4	1O	3.2	9-HOTrE	18	3	1O	4.02	-2	1	1.02	2.18
					15-HETrE	20	3	1O	6.11	-4	1	1.01	2.19
					15-HETE	20	4	1O	5.43	-4	0	1.23	1.97
					15-KETE	20	5	1O	5.24	-4	-1	1.94	1.26
NVO 16:4 +2O RT-1.8	16	4	2O	1.8	9-HpOTrE	18	3	2O	4.28	-2	1	1.28	0.52	Hydroperoxy Hexadecatetraenoic acid (3b)	HpHTE (3b)
					13-HpTrE	18	3	2O	4.65	-2	1	1.65	0.15
					5,6-diHETE	20	4	2O	3.48	-4	0	-0.72	2.52
					14,15-diHETE	20	4	2O	3	-4	0	-1.2	3
					5,12-diHETE	20	4	2O	2.89	-4	0	-1.31	3.11
NVO 16:4 +2O RT-2.6	16	4	2O	2.6	9-HpOTrE	18	3	2O	4.28	-2	1	1.28	1.32
					13-HpTrE	18	3	2O	4.65	-2	1	1.65	0.95
					5,6-diHETE	20	4	2O	3.48	-4	0	-0.72	3.32
					14,15-diHETE	20	4	2O	3	-4	0	-1.2	3.8
					5,12-diHETE	20	4	2O	2.89	-4	0	-1.31	3.91
NVO 16:4 +2O RT-9.8	16	4	2O	9.8	9-HpOTrE	18	3	2O	4.28	-2	1	1.28	8.52
					13-HpTrE	18	3	2O	4.65	-2	1	1.65	8.15
					5,6-diHETE	20	4	2O	3.48	-4	0	-0.72	10.52
					14,15-diHETE	20	4	2O	3	-4	0	-1.2	11
					5,12-diHETE	20	4	2O	2.89	-4	0	-1.31	11.11
NVO 16:4 +3O RT-1.5	16	4	3O	1.5	5,6,15-TriHEPE	20	5	3O	1.72	-4	-1	-1.58	3.08
NVO 16:4 +3O RT-2.3	16	4	3O	2.3	5,6,15-TriHEPE	20	5	3O	1.72	-4	-1	-1.58	3.88
FFA 16:4 RT-2.1	16	4		2.1	AA	20	4		8.1	-4	0	3.9	-1.8
					DHA	22	6		7.7	-6	-2	3.2	-1.1
FFA 16:4 RT-3.2	16	4		3.2	AA	20	4		8.1	-4	0	3.9	-0.7	Hexadecatetraenoic acid (3a)	HTE (3a)
					DHA	22	6		7.7	-6	-2	3.2	0
FFA 16:4 RT-6.1	16	4		6.1	AA	20	4		8.1	-4	0	3.9	2.2
					DHA	22	6		7.7	-6	-2	3.2	2.9
Supplemental Table 2c. Functional group annotations of features annotated as C18 fatty acids and non-volatile oxylipins. The retention times of authentic standards (RT auth) were used to predict retention times for the observed structural isomers. The difference in carbon number and difference in double bond equivalents was calculated for each observed strucutral isomer and the corresponding auth…
Observed					Standard					Calculation				Proposed Functional Group Annotation
Structural Annotation				RT obs	Structural Annotation				RT auth			RT calc	RT obs - RT calc
	#C	#DB	#O		Name	#C	#DB	#O		dC	dDB			Name	Abbrev.
NVO 18:1 +2O RT-7.2	18	1	2O	7.2	9-HpOTrE	18	3	2O	4.28	0	-2	6.08	1.12
					13-HpTrE	18	3	2O	4.65	0	-2	6.45	0.75
					5,6-diHETE	20	4	2O	3.48	-2	-3	4.08	3.12
					14,15-diHETE	20	4	2O	3	-2	-3	3.6	3.6
					5,12-diHETE	20	4	2O	2.89	-2	-3	3.49	3.71
NVO 18:1 +2O RT-8.9	18	1	2O	8.9	9-HpOTrE	18	3	2O	4.28	0	-2	6.08	2.82
					13-HpTrE	18	3	2O	4.65	0	-2	6.45	2.45
					5,6-diHETE	20	4	2O	3.48	-2	-3	4.08	4.82
					14,15-diHETE	20	4	2O	3	-2	-3	3.6	5.3
					5,12-diHETE	20	4	2O	2.89	-2	-3	3.49	5.41
NVO 18:1 +3O RT-1.9	18	1	3O	1.9	5,6,15-TriHEPE	20	5	3O	1.72	-2	-4	3.22	-1.32
NVO 18:2 +1O RT-5.9	18	2	1O	5.9	9-HOTrE	18	3	1O	4.02	0	-1	4.92	0.98
NVO 18:2 +2O RT-2.5	18	2	2O	2.5	9-HpOTrE	18	3	2O	4.28	0	-1	5.18	-2.68	Dihydroxy Octadecadienoic acid (3b)	diHODE (3b)
					13-HpTrE	18	3	2O	4.65	0	-1	5.55	-3.05
					5,6-diHETE	20	4	2O	3.48	-2	-2	3.18	-0.68
					14,15-diHETE	20	4	2O	3	-2	-2	2.7	-0.2
					5,12-diHETE	20	4	2O	2.89	-2	-2	2.59	-0.09
NVO 18:2 +2O RT-3.3	18	2	2O	3.3	9-HpOTrE	18	3	2O	4.28	0	-1	5.18	-1.88	Dihydroxy Octadecadienoic acid (3b)	diHODE (3b)
					13-HpTrE	18	3	2O	4.65	0	-1	5.55	-2.25
					5,6-diHETE	20	4	2O	3.48	-2	-2	3.18	0.12
					14,15-diHETE	20	4	2O	3	-2	-2	2.7	0.6
					5,12-diHETE	20	4	2O	2.89	-2	-2	2.59	0.71
NVO 18:2 +2O RT-6.3	18	2	2O	6.3	9-HpOTrE	18	3	2O	4.28	0	-1	5.18	1.12
					13-HpTrE	18	3	2O	4.65	0	-1	5.55	0.75
					5,6-diHETE	20	4	2O	3.48	-2	-2	3.18	3.12
					14,15-diHETE	20	4	2O	3	-2	-2	2.7	3.6
					5,12-diHETE	20	4	2O	2.89	-2	-2	2.59	3.71
NVO 18:2 +2O RT-8.2	18	2	2O	8.2	9-HpOTrE	18	3	2O	4.28	0	-1	5.18	3.02
					13-HpTrE	18	3	2O	4.65	0	-1	5.55	2.65
					5,6-diHETE	20	4	2O	3.48	-2	-2	3.18	5.02
					14,15-diHETE	20	4	2O	3	-2	-2	2.7	5.5
					5,12-diHETE	20	4	2O	2.89	-2	-2	2.59	5.61
NVO 18:2 +3O RT-1.9	18	2	3O	1.9	5,6,15-TriHEPE	20	5	3O	1.72	-2	-3	2.32	-0.42	Trihydroxy Octadecadienoic acid (3b)	triHODE (3b)
NVO 18:2 +3O RT-2.7	18	2	3O	2.7	5,6,15-TriHEPE	20	5	3O	1.72	-2	-3	2.32	0.38	Trihydroxy Octadecadienoic acid (3b)	triHODE (3b)
NVO 18:2 +3O RT-3.4	18	2	3O	3.4	5,6,15-TriHEPE	20	5	3O	1.72	-2	-3	2.32	1.08
FFA 18:2 RT-9.2	18	2		9.2	AA	20	4		8.1	-2	-2	7.8	1.4
					DHA	22	6		7.7	-4	-4	7.1	2.1
NVO 18:3 +1O RT-4.7	18	3	1O	4.7	9-HOTrE	18	3	1O	4.02	0	0	4.02	0.68
NVO 18:3 +1O RT-5.6	18	3	1O	5.6	9-HOTrE	18	3	1O	4.02	0	0	4.02	1.58
NVO 18:3 +1O RT-6.3	18	3	1O	6.3	9-HOTrE	18	3	1O	4.02	0	0	4.02	2.28
NVO 18:3 +2O RT-10.9	18	3	2O	10.9	9-HpOTrE	18	3	2O	4.28	0	0	4.28	6.62
					13-HpTrE	18	3	2O	4.65	0	0	4.65	6.25
					5,6-diHETE	20	4	2O	3.48	-2	-1	2.28	8.62
					14,15-diHETE	20	4	2O	3	-2	-1	1.8	9.1
					5,12-diHETE	20	4	2O	2.89	-2	-1	1.69	9.21
NVO 18:3 +2O RT-2	18	3	2O	2	9-HpOTrE	18	3	2O	4.28	0	0	4.28	-2.28	Dihydroxy Octadecatrienoic acid (3b)	diHOTrE (3b)
					13-HpTrE	18	3	2O	4.65	0	0	4.65	-2.65
					5,6-diHETE	20	4	2O	3.48	-2	-1	2.28	-0.28
					14,15-diHETE	20	4	2O	3	-2	-1	1.8	0.2
					5,12-diHETE	20	4	2O	2.89	-2	-1	1.69	0.31
NVO 18:3 +2O RT-3.9	18	3	2O	3.9	9-HpOTrE	18	3	2O	4.28	0	0	4.28	-0.38	Hydroperoxy Octadecatrienoic acid (2b)	HpOTrE (2b)
					13-HpTrE	18	3	2O	4.65	0	0	4.65	-4.65
					5,6-diHETE	20	4	2O	3.48	-2	-1	2.28	1.62
					14,15-diHETE	20	4	2O	3	-2	-1	1.8	2.1
					5,12-diHETE	20	4	2O	2.89	-2	-1	1.69	2.21
NVO 18:3 +2O RT-5	18	3	2O	5	9-HpOTrE	18	3	2O	4.28	0	0	4.28	0.72	Hydroperoxy Octadecatrienoic acid (2b)	HpOTrE (2b)
					13-HpTrE	18	3	2O	4.65	0	0	4.65	0.35
					5,6-diHETE	20	4	2O	3.48	-2	-1	2.28	2.72
					14,15-diHETE	20	4	2O	3	-2	-1	1.8	3.2
					5,12-diHETE	20	4	2O	2.89	-2	-1	1.69	3.31
NVO 18:3 +2O RT-5.6	18	3	2O	5.6	9-HpOTrE	18	3	2O	4.28	0	0	4.28	1.32
					13-HpTrE	18	3	2O	4.65	0	0	4.65	-4.65
					5,6-diHETE	20	4	2O	3.48	-2	-1	2.28	3.32
					14,15-diHETE	20	4	2O	3	-2	-1	1.8	3.8
					5,12-diHETE	20	4	2O	2.89	-2	-1	1.69	3.91
NVO 18:3 +2O RT-7.3	18	3	2O	7.3	9-HpOTrE	18	3	2O	4.28	0	0	4.28	3.02
					13-HpTrE	18	3	2O	4.65	0	0	4.65	2.65
					5,6-diHETE	20	4	2O	3.48	-2	-1	2.28	5.02
					14,15-diHETE	20	4	2O	3	-2	-1	1.8	5.5
					5,12-diHETE	20	4	2O	2.89	-2	-1	1.69	5.61
NVO 18:3 +3O RT-1.7	18	3	3O	1.7	5,6,15-TriHEPE	20	5	3O	1.72	-2	-2	1.42	0.28	Trihydroxy Octadecatrienoic acid (3b)	triHOTrE (3b)
NVO 18:3 +3O RT-2.6	18	3	3O	2.6	5,6,15-TriHEPE	20	5	3O	1.72	-2	-2	1.42	1.18
NVO 18:3 +3O RT-3.1	18	3	3O	3.1	5,6,15-TriHEPE	20	5	3O	1.72	-2	-2	1.42	1.68
NVO 18:3 +3O RT-3.9	18	3	3O	3.9	5,6,15-TriHEPE	20	5	3O	1.72	-2	-2	1.42	2.48
NVO 18:3 +3O RT-5.3	18	3	3O	5.3	5,6,15-TriHEPE	20	5	3O	1.72	-2	-2	1.42	3.88
NVO 18:3 +3O RT-6.4	18	3	3O	6.4	5,6,15-TriHEPE	20	5	3O	1.72	-2	-2	1.42	4.98
FFA 18:3 RT-5.9	18	3		5.9	AA	20	4		8.1	-2	-1	6.9	-1	Octadecatrienoic acid (3b)	OTrE (3b)
					DHA	22	6		7.7	-4	-3	6.2	-0.3
NVO 18:4 +1O RT-2	18	4	1O	2	9-HOTrE	18	3	1O	4.02	0	1	3.12	-1.12
NVO 18:4 +1O RT-2.9	18	4	1O	2.9	9-HOTrE	18	3	1O	4.02	0	1	3.12	-0.22	Hydroxy Octadecatetraenoic acid (3b)	HOTE (3b)
NVO 18:4 +1O RT-3.9	18	4	1O	3.9	9-HOTrE	18	3	1O	4.02	0	1	3.12	0.78
NVO 18:4 +2O RT-2.4	18	4	2O	2.4	9-HpOTrE	18	3	2O	4.28	0	1	3.38	-0.98
					13-HpTrE	18	3	2O	4.65	0	1	3.75	-3.75
					5,6-diHETE	20	4	2O	3.48	-2	0	1.38	1.02
					14,15-diHETE	20	4	2O	3	-2	0	0.9	1.5
					5,12-diHETE	20	4	2O	2.89	-2	0	0.79	1.61
NVO 18:4 +2O RT-4.2	18	4	2O	4.2	9-HpOTrE	18	3	2O	4.28	0	1	3.38	0.82	Hydroperoxy Octadecatetraenoic acid (3b)	HpOTE (3b)
					13-HpTrE	18	3	2O	4.65	0	1	3.75	0.45
					5,6-diHETE	20	4	2O	3.48	-2	0	1.38	2.82
					14,15-diHETE	20	4	2O	3	-2	0	0.9	3.3
					5,12-diHETE	20	4	2O	2.89	-2	0	0.79	3.41
NVO 18:4 +2O RT-6.1	18	4	2O	6.1	9-HpOTrE	18	3	2O	4.28	0	1	3.38	2.72
					13-HpTrE	18	3	2O	4.65	0	1	3.75	-3.75
					5,6-diHETE	20	4	2O	3.48	-2	0	1.38	4.72
					14,15-diHETE	20	4	2O	3	-2	0	0.9	5.2
					5,12-diHETE	20	4	2O	2.89	-2	0	0.79	5.31
NVO 18:4 +2O RT-7.7	18	4	2O	7.7	9-HpOTrE	18	3	2O	4.28	0	1	3.38	4.32
					13-HpTrE	18	3	2O	4.65	0	1	3.75	-3.75
					5,6-diHETE	20	4	2O	3.48	-2	0	1.38	6.32
					14,15-diHETE	20	4	2O	3	-2	0	0.9	6.8
					5,12-diHETE	20	4	2O	2.89	-2	0	0.79	6.91
NVO 18:4 +3O RT-1.6	18	4	3O	1.6	5,6,15-TriHEPE	20	5	3O	1.72	-2	-1	0.52	1.08
NVO 18:4 +3O RT-4.8	18	4	3O	4.8	5,6,15-TriHEPE	20	5	3O	1.72	-2	-1	0.52	4.28
FFA 18:4 RT-4.5	18	4		4.5	AA	20	4		8.1	-2	0	6	-1.5
					DHA	22	6		7.7	-4	-2	5.3	-0.8
FFA 18:4 RT-4.8	18	4		4.8	AA	20	4		8.1	-2	0	6	-1.2	Octadecatetraenoic acid (3b)	OTE (3b)
					DHA	22	6		7.7	-4	-2	5.3	-0.5
FFA 18:4 RT-8.5	18	4		8.5	AA	20	4		8.1	-2	0	6	2.5
					DHA	22	6		7.7	-4	-2	5.3	3.2
NVO 18:5 +1O RT-1.7	18	5	1O	1.7	9-HOTrE	18	3	1O	4.02	0	2	2.22	-0.52	Hydroxy Octadecapentaenoic acid (3b)	HOPE (3b)
NVO 18:5 +1O RT-2.5	18	5	1O	2.5	9-HOTrE	18	3	1O	4.02	0	2	2.22	0.28	Hydroxy Octadecapentaenoic acid (3b)	HOPE (3b)
NVO 18:5 +1O RT-3.2	18	5	1O	3.2	9-HOTrE	18	3	1O	4.02	0	2	2.22	0.98
NVO 18:5 +1O RT-4.2	18	5	1O	4.2	9-HOTrE	18	3	1O	4.02	0	2	2.22	1.98
NVO 18:5 +2O RT-1.6	18	5	2O	1.6	9-HpOTrE	18	3	2O	4.28	0	2	2.48	-0.88
					13-HpTrE	18	3	2O	4.65	0	2	2.85	-2.85
					5,6-diHETE	20	4	2O	3.48	-2	1	0.48	1.12
					14,15-diHETE	20	4	2O	3	-2	1	0	1.6
					5,12-diHETE	20	4	2O	2.89	-2	1	-0.11	1.71
NVO 18:5 +2O RT-2.1	18	5	2O	2.1	9-HpOTrE	18	3	2O	4.28	0	2	2.48	-0.38	Hydroperoxy Octadecapentaenoic acid (3b)	HpOPE (3b)
					13-HpTrE	18	3	2O	4.65	0	2	2.85	-2.85
					5,6-diHETE	20	4	2O	3.48	-2	1	0.48	1.62
					14,15-diHETE	20	4	2O	3	-2	1	0	2.1
					5,12-diHETE	20	4	2O	2.89	-2	1	-0.11	2.21
NVO 18:5 +3O RT-2.5	18	5	3O	2.5	5,6,15-TriHEPE	20	5	3O	1.72	-2	0	-0.38	2.88
NVO 18:5 +3O RT-3.1	18	5	3O	3.1	5,6,15-TriHEPE	20	5	3O	1.72	-2	0	-0.38	3.48
FFA 18:5 RT-15.2	18	5		15.2	AA	20	4		8.1	-2	1	5.1	10.1
					DHA	22	6		7.7	-4	-1	4.4	10.8
FFA 18:5 RT-3.8	18	5		3.8	AA	20	4		8.1	-2	1	5.1	-1.3
					DHA	22	6		7.7	-4	-1	4.4	-0.6
FFA 18:5 RT-7.2	18	5		7.2	AA	20	4		8.1	-2	1	5.1	2.1
					DHA	22	6		7.7	-4	-1	4.4	2.8
FFA 18:5 RT-7.9	18	5		7.9	AA	20	4		8.1	-2	1	5.1	2.8
					DHA	22	6		7.7	-4	-1	4.4	3.5
Supplemental Table 2d. Functional group annotations of features annotated as C20 fatty acids and non-volatile oxylipins. The retention times of authentic standards (RT auth) were used to predict retention times for the observed structural isomers. The difference in carbon number and difference in double bond equivalents was calculated for each observed strucutral isomer and the corresponding auth…
Observed					Standard					Calculation				Proposed Functional Group Annotation
Structural Annotation				RT obs	Structural Annotation				RT auth			RT calc	RT obs - RT calc
	#C	#DB	#O		Name	#C	#DB	#O		dC	dDB			Name	Abbrev.
NVO 20:0 +2O RT-11.3	20	0	1O	11.3	5-HpETE	20	4	2O	5.01	0	-4	8.61	2.69
					12-HpETE	20	4	2O	5.95	0	-4	9.55	1.75
					15-HpETE	20	4	2O	5.73	0	-4	9.33	1.97
					5,6-diHETE	20	4	2O	3.48	0	-4	7.08	4.22
					14,15-diHETE	20	4	2O	3	0	-4	6.6	4.7
					5,12-diHETE	20	4	2O	2.89	0	-4	6.49	4.81
NVO 20:0 +3O RT-2.1	20	0	2O	2.1	5,6,15-TriHEPE	20	5	3O	1.72	0	-5	6.22	-4.12
FFA 20:1 RT-12	20	1		12	AA	20	4		8.1	0	-3	10.8	1.2
					DHA	22	6		7.7	-2	-5	10.1	1.9
NVO 20:2 +1O RT-8.5	20	2	1O	8.5	15-HETrE	20	3	1O	6.11	0	-1	7.01	1.49
NVO 20:2 +2O RT-9.3	20	2	1O	9.3	5-HpETE	20	4	2O	5.01	0	-2	6.81	2.49
					12-HpETE	20	4	2O	5.95	0	-2	7.75	1.55
					15-HpETE	20	4	2O	5.73	0	-2	7.53	1.77
					5,6-diHETE	20	4	2O	3.48	0	-2	5.28	4.02
					14,15-diHETE	20	4	2O	3	0	-2	4.8	4.5
					5,12-diHETE	20	4	2O	2.89	0	-2	4.69	4.61
NVO 20:2 +3O RT-1.7	20	2	3O	1.7	5,6,15-TriHEPE	20	5	3O	1.72	0	-3	4.42	-2.72
NVO 20:2 +3O RT-3.7	20	2	3O	3.7	5,6,15-TriHEPE	20	5	3O	1.72	0	-3	4.42	-0.72
NVO 20:2 +3O RT-4.6	20	2	3O	4.6	5,6,15-TriHEPE	20	5	3O	1.72	0	-3	4.42	0.18	Trihydroxy Eicosadienoic acid (3b)	triHEDE (3b)
NVO 20:2 +3O RT-5.7	20	2	3O	5.7	5,6,15-TriHEPE	20	5	3O	1.72	0	-3	4.42	1.28
NVO 20:3 +1O RT-7.1	20	3	1O	7.1	15-HETrE	20	3	1O	6.11	0	0	6.11	0.99
NVO 20:3 +2O RT-2.7	20	3	2O	2.7	5-HpETE	20	4	2O	5.01	0	-1	5.91	-3.21
					12-HpETE	20	4	2O	5.95	0	-1	6.85	-4.15
					15-HpETE	20	4	2O	5.73	0	-1	6.63	-3.93
					5,6-diHETE	20	4	2O	3.48	0	-1	4.38	-1.68
					14,15-diHETE	20	4	2O	3	0	-1	3.9	-1.2
					5,12-diHETE	20	4	2O	2.89	0	-1	3.79	-1.09
NVO 20:3 +2O RT-3.9	20	3	2O	3.9	5-HpETE	20	4	2O	5.01	0	-1	5.91	-2.01	Dihydroxy eicosatrienoic acid (3a)	diHETrE (3a)
					12-HpETE	20	4	2O	5.95	0	-1	6.85	-2.95
					15-HpETE	20	4	2O	5.73	0	-1	6.63	-2.73
					5,6-diHETE	20	4	2O	3.48	0	-1	4.38	-0.48
					14,15-diHETE	20	4	2O	3	0	-1	3.9	0
					5,12-diHETE	20	4	2O	2.89	0	-1	3.79	0.11
NVO 20:3 +2O RT-4.3	20	3	2O	4.3	5-HpETE	20	4	2O	5.01	0	-1	5.91	-1.61	Dihydroxy eicosatrienoic acid (3b)	diHETrE (3b)
					12-HpETE	20	4	2O	5.95	0	-1	6.85	-2.55
					15-HpETE	20	4	2O	5.73	0	-1	6.63	-2.33
					5,6-diHETE	20	4	2O	3.48	0	-1	4.38	-0.08
					14,15-diHETE	20	4	2O	3	0	-1	3.9	0.4
					5,12-diHETE	20	4	2O	2.89	0	-1	3.79	0.51
NVO 20:3 +2O RT-4.7	20	3	2O	4.7	5-HpETE	20	4	2O	5.01	0	-1	5.91	-1.21	Dihydroxy eicosatrienoic acid (3b)	diHETrE (3b)
					12-HpETE	20	4	2O	5.95	0	-1	6.85	-2.15
					15-HpETE	20	4	2O	5.73	0	-1	6.63	-1.93
					5,6-diHETE	20	4	2O	3.48	0	-1	4.38	0.32
					14,15-diHETE	20	4	2O	3	0	-1	3.9	0.8
					5,12-diHETE	20	4	2O	2.89	0	-1	3.79	0.91
NVO 20:3 +2O RT-5	20	3	2O	5	5-HpETE	20	4	2O	5.01	0	-1	5.91	-0.91
					12-HpETE	20	4	2O	5.95	0	-1	6.85	-1.85
					15-HpETE	20	4	2O	5.73	0	-1	6.63	-1.63
					5,6-diHETE	20	4	2O	3.48	0	-1	4.38	0.62
					14,15-diHETE	20	4	2O	3	0	-1	3.9	1.1
					5,12-diHETE	20	4	2O	2.89	0	-1	3.79	1.21
NVO 20:3 +2O RT-6.2	20	3	2O	6.2	5-HpETE	20	4	2O	5.01	0	-1	5.91	0.29	Hydroperoxy eicosatrienoic acid (3b)	HpETrE (3b)
					12-HpETE	20	4	2O	5.95	0	-1	6.85	-0.65
					15-HpETE	20	4	2O	5.73	0	-1	6.63	-0.43
					5,6-diHETE	20	4	2O	3.48	0	-1	4.38	1.82
					14,15-diHETE	20	4	2O	3	0	-1	3.9	2.3
					5,12-diHETE	20	4	2O	2.89	0	-1	3.79	2.41
NVO 20:3 +2O RT-6.5	20	3	3O	6.5	5-HpETE	20	4	2O	5.01	0	-1	5.91	0.59	Hydroperoxy eicosatrienoic acid (3b)	HpETrE (3b)
					12-HpETE	20	4	2O	5.95	0	-1	6.85	-0.35
					15-HpETE	20	4	2O	5.73	0	-1	6.63	-0.13
					5,6-diHETE	20	4	2O	3.48	0	-1	4.38	2.12
					14,15-diHETE	20	4	2O	3	0	-1	3.9	2.6
					5,12-diHETE	20	4	2O	2.89	0	-1	3.79	2.71
NVO 20:3 +2O RT-7.6	20	3	3O	7.6	5-HpETE	20	4	2O	5.01	0	-1	5.91	1.69
					12-HpETE	20	4	2O	5.95	0	-1	6.85	0.75
					15-HpETE	20	4	2O	5.73	0	-1	6.63	0.97
					5,6-diHETE	20	4	2O	3.48	0	-1	4.38	3.22
					14,15-diHETE	20	4	2O	3	0	-1	3.9	3.7
					5,12-diHETE	20	4	2O	2.89	0	-1	3.79	3.81
NVO 20:3 +3O RT-2.1	20	3	3O	2.1	5,6,15-TriHEPE	20	5	3O	1.72	0	-2	3.52	-1.42
NVO 20:3 +3O RT-4	20	3	3O	4	5,6,15-TriHEPE	20	5	3O	1.72	0	-2	3.52	0.48	trihydroxy eicosatrienoic acid (3b)	triHETrE (3b)
NVO 20:3 +3O RT-7	20	3	3O	7	5,6,15-TriHEPE	20	5	3O	1.72	0	-2	3.52	3.48
NVO 20:3 +3O RT-7.7	20	3	3O	7.7	5,6,15-TriHEPE	20	5	3O	1.72	0	-2	3.52	4.18
NVO 20:4 +1O RT-2.8	20	4	1O	2.8	15-HETE	20	4	1O	5.43	0	0	5.43	-2.63
NVO 20:4 +1O RT-4.9	20	4	1O	4.9	15-HETE	20	4	1O	5.43	0	0	5.43	-0.53	Hydroxy eicosatetraenoic acid (2b)	HETE (2b)
NVO 20:4 +1O RT-5.2	20	4	1O	5.2	15-HETE	20	4	1O	5.43	0	0	5.43	-0.23	Hydroxy eicosatetraenoic acid (2b)	HETE (2b)
NVO 20:4 +1O RT-6.1	20	4	1O	6.1	15-HETE	20	4	1O	5.43	0	0	5.43	0.67
NVO 20:4 +1O RT-6.8	20	4	1O	6.8	15-HETE	20	4	1O	5.43	0	0	5.43	1.37
NVO 20:4 +1O RT-7.9	20	4	1O	7.9	15-HETE	20	4	1O	5.43	0	0	5.43	2.47
NVO 20:4 +2O RT-4	20	4	2O	4	5-HpETE	20	4	2O	5.01	0	0	5.01	-1.01	dihydroxy eicosatetraenoic acid (2b)	diHETE (2b)
					12-HpETE	20	4	2O	5.95	0	0	5.95	-1.95
					15-HpETE	20	4	2O	5.73	0	0	5.73	-1.73
					5,6-diHETE	20	4	2O	3.48	0	0	3.48	0.52
					14,15-diHETE	20	4	2O	3	0	0	3	1
					5,12-diHETE	20	4	2O	2.89	0	0	2.89	1.11
NVO 20:4 +2O RT-4	20	4	2O	4	5-HpETE	20	4	2O	5.01	0	0	5.01	-1.01	dihydroxy eicosatetraenoic acid (2b)	diHETE (2b)
					12-HpETE	20	4	2O	5.95	0	0	5.95	-1.95
					15-HpETE	20	4	2O	5.73	0	0	5.73	-1.73
					5,6-diHETE	20	4	2O	3.48	0	0	3.48	0.52
					14,15-diHETE	20	4	2O	3	0	0	3	1
					5,12-diHETE	20	4	2O	2.89	0	0	2.89	1.11
NVO 20:4 +2O RT-6.5	20	4	2O	6.5	5-HpETE	20	4	2O	5.01	0	0	5.01	1.49
					12-HpETE	20	4	2O	5.95	0	0	5.95	0.55
					15-HpETE	20	4	2O	5.73	0	0	5.73	0.77
					5,6-diHETE	20	4	2O	3.48	0	0	3.48	3.02
					14,15-diHETE	20	4	2O	3	0	0	3	3.5
					5,12-diHETE	20	4	2O	2.89	0	0	2.89	3.61
NVO 20:4 +3O RT-1.9	20	4	3O	1.9	5,6,15-TriHEPE	20	5	3O	1.72	0	-1	2.62	-0.72
NVO 20:4 +3O RT-2.3	20	4	3O	2.3	5,6,15-TriHEPE	20	5	3O	1.72	0	-1	2.62	-0.32	trihydroxy eicosatetraenoic acid (3b)	triHETE (3b)
NVO 20:4 +3O RT-2.6	20	4	3O	2.6	5,6,15-TriHEPE	20	5	3O	1.72	0	-1	2.62	-0.02	trihydroxy eicosatetraenoic acid (3a)	triHETE (3a)
NVO 20:4 +3O RT-2.9	20	4	3O	2.9	5,6,15-TriHEPE	20	5	3O	1.72	0	-1	2.62	0.28	trihydroxy eicosatetraenoic acid (3b)	triHETE (3b)
NVO 20:4 +3O RT-3.4	20	4	3O	3.4	5,6,15-TriHEPE	20	5	3O	1.72	0	-1	2.62	0.78
NVO 20:4 +3O RT-3.8	20	4	3O	3.8	5,6,15-TriHEPE	20	5	3O	1.72	0	-1	2.62	1.18
NVO 20:4 +3O RT-4.4	20	4	3O	4.4	5,6,15-TriHEPE	20	5	3O	1.72	0	-1	2.62	1.78
NVO 20:4 +3O RT-6.3	20	4	3O	6.3	5,6,15-TriHEPE	20	5	3O	1.7	0	-1	2.6	3.7
NVO 20:5 +1O RT-3.6	20	5	1O	3.6	15-HETE	20	4	1O	5.43	0	1	4.53	-0.93
NVO 20:5 +1O RT-4.3	20	5	1O	4.3	15-HETE	20	4	1O	5.43	0	1	4.53	-0.23	Hydroxy eicosapentaenoic acid (3b)	HEPE (3b)
NVO 20:5 +1O RT-4.9	20	5	1O	4.9	15-HETE	20	4	1O	5.43	0	1	4.53	0.37	Hydroxy eicosapentaenoic acid (3b)	HEPE (3b)
NVO 20:5 +1O RT-6.3	20	5	1O	6.3	15-HETE	20	4	1O	5.43	0	1	4.53	1.77
NVO 20:5 +2O RT-1.6	20	5	2O	1.6	5-HpETE	20	4	2O	5.01	0	1	4.11	-2.51	Dihydroxy eicosapentaenoic acid (3b)	diHEPE (3b)
					12-HpETE	20	4	2O	5.95	0	1	5.05	-3.45
					15-HpETE	20	4	2O	5.73	0	1	4.83	-3.23
					5,6-diHETE	20	4	2O	3.48	0	1	2.58	-0.98
					14,15-diHETE	20	4	2O	3	0	1	2.1	-0.5
					5,12-diHETE	20	4	2O	2.89	0	1	1.99	-0.39
NVO 20:5 +2O RT-2.2	20	5	2O	2.2	5-HpETE	20	4	2O	5.01	0	1	4.11	-1.91	Dihydroxy eicosapentaenoic acid (3b)	diHEPE (3b)
					12-HpETE	20	4	2O	5.95	0	1	5.05	-2.85
					15-HpETE	20	4	2O	5.73	0	1	4.83	-2.63
					5,6-diHETE	20	4	2O	3.48	0	1	2.58	-0.38
					14,15-diHETE	20	4	2O	3	0	1	2.1	0.1
					5,12-diHETE	20	4	2O	2.89	0	1	1.99	0.21
NVO 20:5 +2O RT-3.1	20	5	2O	3.1	5-HpETE	20	4	2O	5.01	0	1	4.11	-1.01	Dihydroxy eicosapentaenoic acid (3b)	diHEPE (3b)
					12-HpETE	20	4	2O	5.95	0	1	5.05	-1.95
					15-HpETE	20	4	2O	5.73	0	1	4.83	-1.73
					5,6-diHETE	20	4	2O	3.48	0	1	2.58	0.52
					14,15-diHETE	20	4	2O	3	0	1	2.1	1
					5,12-diHETE	20	4	2O	2.89	0	1	1.99	1.11
NVO 20:5 +2O RT-4.1	20	5	2O	4.1	5-HpETE	20	4	2O	5.01	0	1	4.11	-0.01	Hydroperoxy eicosapentaenoic acid (3a)	HpEPE (3a)
					12-HpETE	20	4	2O	5.95	0	1	5.05	-0.95
					15-HpETE	20	4	2O	5.73	0	1	4.83	-0.73
					5,6-diHETE	20	4	2O	3.48	0	1	2.58	1.52
					14,15-diHETE	20	4	2O	3	0	1	2.1	2
					5,12-diHETE	20	4	2O	2.89	0	1	1.99	2.11
NVO 20:5 +2O RT-4.4	20	5	2O	4.4	5-HpETE	20	4	2O	5.01	0	1	4.11	0.29	Hydroperoxy eicosapentaenoic acid (3b)	HpEPE (3b)
					12-HpETE	20	4	2O	5.95	0	1	5.05	-0.65
					15-HpETE	20	4	2O	5.73	0	1	4.83	-0.43
					5,6-diHETE	20	4	2O	3.48	0	1	2.58	1.82
					14,15-diHETE	20	4	2O	3	0	1	2.1	2.3
					5,12-diHETE	20	4	2O	2.89	0	1	1.99	2.41
NVO 20:5 +2O RT-5.3	20	5	2O	5.3	5-HpETE	20	4	2O	5.01	0	1	4.11	1.19	Hydroperoxy eicosapentaenoic acid (3b)	HpEPE (3b)
					12-HpETE	20	4	2O	5.95	0	1	5.05	0.25
					15-HpETE	20	4	2O	5.73	0	1	4.83	0.47
					5,6-diHETE	20	4	2O	3.48	0	1	2.58	2.72
					14,15-diHETE	20	4	2O	3	0	1	2.1	3.2
					5,12-diHETE	20	4	2O	2.89	0	1	1.99	3.31
NVO 20:5 +2O RT-6.1	20	5	2O	6.1	5-HpETE	20	4	2O	5.01	0	1	4.11	1.99
					12-HpETE	20	4	2O	5.95	0	1	5.05	1.05
					15-HpETE	20	4	2O	5.73	0	1	4.83	1.27
					5,6-diHETE	20	4	2O	3.48	0	1	2.58	3.52
					14,15-diHETE	20	4	2O	3	0	1	2.1	4
					5,12-diHETE	20	4	2O	2.89	0	1	1.99	4.11
NVO 20:5 +2O RT-6.4	20	5	2O	6.4	5-HpETE	20	4	2O	5.01	0	1	4.11	2.29
					12-HpETE	20	4	2O	5.95	0	1	5.05	1.35
					15-HpETE	20	4	2O	5.73	0	1	4.83	1.57
					5,6-diHETE	20	4	2O	3.48	0	1	2.58	3.82
					14,15-diHETE	20	4	2O	3	0	1	2.1	4.3
					5,12-diHETE	20	4	2O	2.89	0	1	1.99	4.41
NVO 20:5 +2O RT-6.7	20	5	2O	6.7	5-HpETE	20	4	2O	5.01	0	1	4.11	2.59
					12-HpETE	20	4	2O	5.95	0	1	5.05	1.65
					15-HpETE	20	4	2O	5.73	0	1	4.83	1.87
					5,6-diHETE	20	4	2O	3.48	0	1	2.58	4.12
					14,15-diHETE	20	4	2O	3	0	1	2.1	4.6
					5,12-diHETE	20	4	2O	2.89	0	1	1.99	4.71
NVO 20:5 +2O RT-7.2	20	5	2O	7.2	5-HpETE	20	4	2O	5.01	0	1	4.11	3.09
					12-HpETE	20	4	2O	5.95	0	1	5.05	2.15
					15-HpETE	20	4	2O	5.73	0	1	4.83	2.37
					5,6-diHETE	20	4	2O	3.48	0	1	2.58	4.62
					14,15-diHETE	20	4	2O	3	0	1	2.1	5.1
					5,12-diHETE	20	4	2O	2.89	0	1	1.99	5.21
NVO 20:5 +2O RT-8.2	20	5	2O	8.2	5-HpETE	20	4	2O	5.01	0	1	4.11	4.09
					12-HpETE	20	4	2O	5.95	0	1	5.05	3.15
					15-HpETE	20	4	2O	5.73	0	1	4.83	3.37
					5,6-diHETE	20	4	2O	3.48	0	1	2.58	5.62
					14,15-diHETE	20	4	2O	3	0	1	2.1	6.1
					5,12-diHETE	20	4	2O	2.89	0	1	1.99	6.21
NVO 20:5 +2O RT-8.7	20	5	2O	8.7	5-HpETE	20	4	2O	5.01	0	1	4.11	4.59
					12-HpETE	20	4	2O	5.95	0	1	5.05	3.65
					15-HpETE	20	4	2O	5.73	0	1	4.83	3.87
					5,6-diHETE	20	4	2O	3.48	0	1	2.58	6.12
					14,15-diHETE	20	4	2O	3	0	1	2.1	6.6
					5,12-diHETE	20	4	2O	2.89	0	1	1.99	6.71
NVO 20:5 +3O RT-1.9	20	5	3O	1.9	5,6,15-TriHEPE	20	5	3O	1.72	0	0	1.72	0.18	Trihydroxy eicosapentaenoic acid (2b)	TriHEPE (2b)
NVO 20:5 +3O RT-3.4	20	5	3O	3.4	5,6,15-TriHEPE	20	5	3O	1.72	0	0	1.72	1.68
NVO 20:5 +3O RT-4	20	5	3O	4	5,6,15-TriHEPE	20	5	3O	1.72	0	0	1.72	2.28
NVO 20:5 +3O RT-4.3	20	5	3O	4.3	5,6,15-TriHEPE	20	5	3O	1.72	0	0	1.72	2.58
FFA 20:5 RT-11.9	20	5		11.9	AA	20	4		8.1	0	1	7.2	4.7
					DHA	22	6		7.7	-2	-1	6.5	5.4
FFA 20:5 RT-6.1	20	5		6.1	AA	20	4		8.1	0	1	7.2	-1.1	Eicosapentaenoic acid (3b)	EPA (3b)
					DHA	22	6		7.7	-2	-1	6.5	-0.4
Supplemental Table 2e. Functional group annotations of features annotated as long-chain (C22 >) fatty acids and non-volatile oxylipins. The retention times of authentic standards (RT auth) were used to predict retention times for the observed structural isomers. The difference in carbon number and difference in double bond equivalents was calculated for each observed strucutral isomer and the cor…
Observed					Standard					Calculation				Proposed Functional Group Annotation
Structural Annotation				RT obs	Structural Annotation				RT auth			RT calc	RT obs - RT calc
	#C	#DB	#O		Name	#C	#DB	#O		dC	dDB			Name	Abbrev.
NVO 22:0 +3O RT-10.5	22	0	3O	10.5	5,6,15-TriHEPE	20	5	3O	1.72	2	-5	8.32	2.18
FFA 22:0 RT-14.3	22	0		14.3	DHA	22	6		7.71	0	-6	13.11	1.19
FFA 22:1 RT-12.9	22	1		12.9	DHA	22	6		7.71	0	-5	12.21	0.69
FFA 22:2 RT-11.8	22	2		11.8	DHA	22	6		7.71	0	-4	11.31	0.49	Docosadienoic acid (3b)	DoDE (3b)
NVO 22:3 +1O RT-8.8	22	3	1O	8.8	15-HEPE	20	5	1O	4.56	2	-2	8.46	0.34	Hydroxy Docosatriaenoic acid (3b)	HDoTrE (3b)
NVO 22:3 +3O RT-2.5	22	3	1O	2.5	15-HEPE	20	5	1O	4.56	2	-2	8.46	-5.96
NVO 22:4 +1O RT-7.5	22	4	1O	7.5	15-HEPE	20	5	1O	4.56	2	-1	7.56	-0.06	Hydroxy Docosatetraenoic acid (3b)	HDoTE (3b)
NVO 22:4 +1O RT-8	22	4	1O	8	15-HEPE	20	5	1O	4.56	2	-1	7.56	0.44	Hydroxy Docosatetraenoic acid (3b)	HDoTE (3b)
NVO 22:5 +1O RT-7.7	22	5	1O	7.7	15-HEPE	20	5	1O	4.56	2	0	6.66	1.04
NVO 22:5 +2O RT-9.2	22	5	2O	9.2	5-HpETE	20	4	2O	5.01	2	1	6.21	2.99
					12-HpETE	20	4	2O	5.95	2	1	7.15	2.05
					15-HpETE	20	4	2O	5.73	2	1	6.93	2.27
					5,6-diHETE	20	4	2O	3.48	2	1	4.68	4.52
					14,15-diHETE	20	4	2O	3	2	1	4.2	5
					5,12-diHETE	20	4	2O	2.89	2	1	4.09	5.11
NVO 22:5 +3O RT-2.2	22	5	3O	2.2	5,6,15-TriHEPE	20	5	3O	1.72	2	0	3.82	-1.62
NVO 22:5 +3O RT-5.9	22	5	3O	5.9	5,6,15-TriHEPE	20	5	3O	1.72	2	0	3.82	2.08
NVO 22:6 +1O RT-5.6	22	6	1O	5.6	15-HEPE	20	5	1O	4.56	2	1	5.76	-0.16	Hydroxy Docosahexaenoic acid (3b)	HDoHE (3b)
NVO 22:6 +1O RT-6.1	22	6	1O	6.1	15-HEPE	20	5	1O	4.56	2	1	5.76	0.34	Hydroxy Docosahexaenoic acid (3b)	HDoHE (3b)
NVO 22:6 +1O RT-6.8	22	6	1O	6.8	15-HEPE	20	5	1O	4.56	2	1	5.76	1.04
NVO 22:6 +2O RT-1.8	22	6	2O	1.8	5-HpETE	20	4	2O	5.01	2	2	5.31	-3.51
					12-HpETE	20	4	2O	5.95	2	2	6.25	-4.45
					15-HpETE	20	4	2O	5.73	2	2	6.03	-4.23
					5,6-diHETE	20	4	2O	3.48	2	2	3.78	-1.98
					14,15-diHETE	20	4	2O	3	2	2	3.3	-1.5
					5,12-diHETE	20	4	2O	2.89	2	2	3.19	-1.39
NVO 22:6 +2O RT-3	22	6	2O	3	5-HpETE	20	4	2O	5.01	2	2	5.31	-2.31	Dihydroxy Docosahexaenoic acid (3b)	diHDoHE (3b)
					12-HpETE	20	4	2O	5.95	2	2	6.25	-3.25
					15-HpETE	20	4	2O	5.73	2	2	6.03	-3.03
					5,6-diHETE	20	4	2O	3.48	2	2	3.78	-0.78
					14,15-diHETE	20	4	2O	3	2	2	3.3	-0.3
					5,12-diHETE	20	4	2O	2.89	2	2	3.19	-0.19
NVO 22:6 +2O RT-3.8	22	6	2O	3.8	5-HpETE	20	4	2O	5.01	2	2	5.31	-1.51	Dihydroxy Docosahexaenoic acid (3a)	diHDoHE (3a)
					12-HpETE	20	4	2O	5.95	2	2	6.25	-2.45
					15-HpETE	20	4	2O	5.73	2	2	6.03	-2.23
					5,6-diHETE	20	4	2O	3.48	2	2	3.78	0.02
					14,15-diHETE	20	4	2O	3	2	2	3.3	0.5
					5,12-diHETE	20	4	2O	2.89	2	2	3.19	0.61
NVO 22:6 +2O RT-4.2	22	6	2O	4.2	5-HpETE	20	4	2O	5.01	2	2	5.31	-1.11	Dihydroxy Docosahexaenoic acid (3b)	diHDoHE (3b)
					12-HpETE	20	4	2O	5.95	2	2	6.25	-2.05
					15-HpETE	20	4	2O	5.73	2	2	6.03	-1.83
					5,6-diHETE	20	4	2O	3.48	2	2	3.78	0.42
					14,15-diHETE	20	4	2O	3	2	2	3.3	0.9
					5,12-diHETE	20	4	2O	2.89	2	2	3.19	1.01
NVO 22:6 +2O RT-6.5	22	6	2O	6.5	5-HpETE	20	4	2O	5.01	2	2	5.31	1.19	Hydroperoxy Docosahexaenoic acid (3b)	HpDoHE (3b)
					12-HpETE	20	4	2O	5.95	2	2	6.25	0.25
					15-HpETE	20	4	2O	5.73	2	2	6.03	0.47
					5,6-diHETE	20	4	2O	3.48	2	2	3.78	2.72
					14,15-diHETE	20	4	2O	3	2	2	3.3	3.2
					5,12-diHETE	20	4	2O	2.89	2	2	3.19	3.31
NVO 22:6 +2O RT-8.7	22	6	2O	8.7	5-HpETE	20	4	2O	5.01	2	2	5.31	3.39
					12-HpETE	20	4	2O	5.95	2	2	6.25	2.45
					15-HpETE	20	4	2O	5.73	2	2	6.03	2.67
					5,6-diHETE	20	4	2O	3.48	2	2	3.78	4.92
					14,15-diHETE	20	4	2O	3	2	2	3.3	5.4
					5,12-diHETE	20	4	2O	2.89	2	2	3.19	5.51
NVO 22:6 +3O RT-1.3	22	6	3O	1.3	5,6,15-TriHEPE	20	5	3O	1.72	2	1	2.92	-1.62
NVO 22:6 +3O RT-1.9	22	6	3O	1.9	5,6,15-TriHEPE	20	5	3O	1.7	2	1	2.9	-1
NVO 22:6 +3O RT-4.7	22	6	3O	4.7	5,6,15-TriHEPE	20	5	3O	1.68	2	1	2.88	1.82
NVO 22:6 +3O RT-5.6	22	6	3O	5.6	5,6,15-TriHEPE	20	5	3O	1.66	2	1	2.86	2.74
FFA 22:6 RT-7.1	22	6		7.1	DHA	22	6		7.71	0	0	7.71	-0.61
FFA 24:0 RT-15.8	24	0		15.8	DHA	22	6		7.71	2	-6	15.21	0.59
FFA 24:1 RT-14.4	24	1		14.4	DHA	22	6		7.71	2	-5	14.31	0.09	Tetracosenoic acid (3b)	TMA (3b)
FFA 24:1 RT-14.9	24	1		14.9	DHA	22	6		7.71	2	-5	14.31	0.59
NVO 24:2 +2O RT-11.6	24	2	2O	11.6	5-HpETE	20	4	2O	5.01	4	-2	11.01	0.59	Hydroperoxy Tetracosadienoic acid (3b)	HpTDE (3b)
					12-HpETE	20	4	2O	5.95	4	-2	11.95	-0.35
					15-HpETE	20	4	2O	5.73	4	-2	11.73	-0.13
					5,6-diHETE	20	4	2O	3.48	4	-2	9.48	2.12
					14,15-diHETE	20	4	2O	3	4	-2	9	2.6
					5,12-diHETE	20	4	2O	2.89	4	-2	8.89	2.71
FFA 24:2 RT-13.2	24	2		13.2	DHA	22	6		7.71	2	-4	13.41	-0.21	Tetracosadienoic acid (3b)	TDE (3b)
Supplemental Table 2f. Elemental formulas of features annotated as PUAs. The retention times of authentic standards (RT auth) were used to predict retention times for the observed structural isomers. The difference in carbon number and difference in double bond equivalents was calculated for each observed strucutral isomer and the corresponding authentic standard. Equation (1) was applied to dete…
Observed					Standard					Calculation				Elemental Formula
Structural Annotation				RT obs	Structural Annotation				RT auth			RT calc	RT obs - RT calc
	#C	#DB	#O		Name	#C	#DB	#O		dC	dDB
PUA 10:2 RT-5.3	10	2		5.3	DD	10	2		3.65	0	0	3.65	1.65	C10H16O
PUA 10:3 RT-1.6	10	3		1.6	DD	10	2		3.65	0	1	2.75	-1.15	C10H14O
PUA 10:4 RT-1.6	10	4		1.6	DD	10	2		3.65	0	2	1.85	-0.25	Decatetraenal	DT
PUA 12:1 RT-2.1	12	1		2.1	DD	10	2		3.65	2	-1	6.65	-4.55	C12H22O
PUA 12:1 RT-3.4	12	1		3.4	DD	10	2		3.65	2	-1	6.65	-3.25	C12H22O
PUA 12:4 RT-1.8	12	4		1.8	DD	10	2		3.65	2	2	3.95	-2.15	C12H16O
PUA 12:4 RT-2.3	12	4		2.3	DD	10	2		3.65	2	2	3.95	-1.65	C12H16O
PUA 12:5 +1O RT	1.7		C12H14O2		C12H14O2 RT-1.7
PUA 6:1 +4O RT	1.2		C6H10O5		C6H10O5 RT-1.2
PUA 6:1 +4O RT	1.8		C6H10O5		C6H10O5 RT-1.8
PUA 8:0 +2O RT	1.6		C8H16O3		C8H16O3 RT-1.6
PUA 8:1 +1O RT	1.5		C8H14O2		C8H14O2 RT-1.5
PUA 8:1 +1O RT	2.2		C8H14O2		C8H14O2 RT-2.2
PUA 8:2 +1O RT	1.5		C8H10O2		C8H10O2 RT-1.5
PUA 8:3 +2O RT	1.3		C8H10O3		C8H10O3 RT-1.3
