# Supplementary material for: Viral Infection Leads to a Unique Suite of Allelopathic Chemical Signals in Three Diatom Host–Virus Pairs
Source: Mar Drugs. 2024 May 17;22(5):228. doi: 10.3390/md22050228 (PMC11123003; doi:10.3390/md22050228)
Supplement: Supplementary file 1 [file marinedrugs-22-00228-s001.zip › Supplemental Table S3 Annotation Table for CT RNAV March 2024.xlsx]

## Sheet: Sheet12
Supplemental Table 3a. Functional group annotations of features annotated as small (<C14) fatty acids and non-volatile oxylipins in C. tenuissimus + RNA virus experiments. The retention times of authentic standards (RT auth) were used to predict retention times for the observed structural isomers. The difference in carbon number and difference in double bond equivalents was calculated for each ob…
Observed					Standard					Calculation				Proposed Functional Group Annotation
Structural Annotation				RT obs	Structural Annotation				RT auth			RT calc	RT obs - RT calc
	#C	#DB	#O		Name	#C	#DB	#O		dC	dDB			Name	Abbrev.
FFA 14:0 +2O RT-2.9	14	0	2O	2.9	9-HpODE	18	2	2O	5.44	-4	-2	3.04	-0.14	Hydroperoxy tetradecanoic acid (3b)	HpTE (3b)
FFA 14:0 +3O RT-1.5	14	0	3O	1.5	5,6,15-TriHEPE	20	5	3O	1.72	-6	-5	-0.08	1.58
FFA 14:1 +1O RT-3	14	1	1O	3	9-HOTrE	18	3	1O	4.02	-4	-2	1.62	1.38
FFA 14:1 +2O RT-1.8	14	1	2O	1.8	9-HpODE	18	2	2O	5.44	-4	-1	2.14	-0.34	Hydroperoxy tetradecaenoic acid (3b)	HpTME (3b)
FFA 14:1 +3O RT-1.6	14	1	3O	1.6	5,6,15-TriHEPE	20	5	3O	1.72	-6	-4	-0.98	2.58
FFA 14:2 +1O RT-2.3	14	2	1O	2.3	9-HOTrE	18	3	1O	4.02	-4	-1	0.72	1.58
FFA 14:2 +1O RT-2.6	14	2	1O	2.6	9-HOTrE	18	3	1O	4.02	-4	-1	0.72	1.88
FFA 14:2 +1O RT-3.1	14	2	1O	3.1	9-HOTrE	18	3	1O	4.02	-4	-1	0.72	2.38
FFA 14:2 +1O RT-3.9	14	2	1O	3.9	9-HOTrE	18	3	1O	4.02	-4	-1	0.72	3.18
FFA 14:2 +1O RT-4.8	14	2	1O	4.8	9-HOTrE	18	3	1O	4.02	-4	-1	0.72	4.08
FFA 14:2 +2O RT-1.9	14	2	2O	1.9	9-HpODE	18	2	2O	5.44	-4	0	1.24	0.66
FFA 14:2 +3O RT-1.5	14	2	3O	1.5	5,6,15-TriHEPE	20	5	3O	1.72	-6	-3	-1.88	3.38
FFA 14:2 RT-2	14	2		2	AA	20	4		8.1	-6	-2	3.6	-1.6
Supplemental Table 3a. Functional group annotations of features annotated as C16 fatty acids and non-volatile oxylipins. The retention times of authentic standards (RT auth) were used to predict retention times for the observed structural isomers. The difference in carbon number and difference in double bond equivalents was calculated for each observed strucutral isomer and the corresponding auth…
Observed					Standard					Calculation				Proposed Functional Group Annotation
Structural Annotation				RT obs	Structural Annotation				RT auth			RT calc	RT obs - RT calc
	#C	#DB	#O		Name	#C	#DB	#O		dC	dDB			Name	Abbrev.
FFA 16:0 +2O RT-4.2	16	0	2O	4.8	9-HpODE	18	2	2O	5.44	-2	-2	5.14	-0.34	Hydroperoxy hexadecanoic acid (3b)	HpHA (3b)
					5,6-diHETE	20	4	2O	3.48	-4	-4	2.88	1.92
					14,15-diHETE	20	4	2O	3	-4	-4	2.4	2.4
					5,12-diHETE	20	4	2O	2.89	-4	-4	2.29	2.51
FFA 16:0 +2O RT-4.9	16	0	2O	4.9	9-HpODE	18	2	2O	5.44	-2	-2	5.14	-0.24	Hydroperoxy hexadecanoic acid (3b)	HpHA (3b)
					5,6-diHETE	20	4	2O	3.48	-4	-4	2.88	2.02
					14,15-diHETE	20	4	2O	3	-4	-4	2.4	2.5
					5,12-diHETE	20	4	2O	2.89	-4	-4	2.29	2.61
FFA 16:0 +3O RT-3	16	0	3O	3	5,6,15-TriHEPE	20	5	3O	1.72	-4	-5	2.02	0.98
FFA 16:1 +1O RT-4	16	1	1O	4	9-HOTrE	18	3	1O	4.02	-2	-2	3.72	0.28	Hydroxy Hexadecaenoic acid (3b)	HHME (3b)
FFA 16:1 +2O RT-2.5	16	1	2O	2.5	9-HpODE	18	2	2O	5.44	-2	-1	4.24	-1.74	Dihydroxy Hexadecaenoic acid (3b)	diHHME (3b)
					5,6-diHETE	20	4	2O	3.48	-4	-3	1.98	0.52
					14,15-diHETE	20	4	2O	3	-4	-3	1.5	1
					5,12-diHETE	20	4	2O	2.89	-4	-3	1.39	1.11
FFA 16:1 +2O RT-4.5	16	1	2O	4.5	9-HpODE	18	2	2O	5.44	-2	-1	4.24	0.26	Hydroperoxy Hexadecaenoic acid (3b)	HpHME (3b)
					5,6-diHETE	20	4	2O	3.48	-4	-3	1.98	2.52
					14,15-diHETE	20	4	2O	3	-4	-3	1.5	3
					5,12-diHETE	20	4	2O	2.89	-4	-3	1.39	3.11
FFA 16:1 +3O RT-1.7	16	1	3O	1.7	5,6,15-TriHEPE	20	5	3O	1.72	-4	-4	1.12	0.58
FFA 16:2 +1O RT-3.5	16	2	1O	3.5	9-HOTrE	18	3	1O	4.02	-2	-1	2.82	0.68
FFA 16:2 +2O RT-1.6	16	2	2O	1.6	9-HpODE	18	2	2O	5.44	-2	0	3.34	-1.74
					5,6-diHETE	20	4	2O	3.48	-4	-2	1.08	0.52
					14,15-diHETE	20	4	2O	3	-4	-2	0.6	1
					5,12-diHETE	20	4	2O	2.89	-4	-2	0.49	1.11
FFA 16:2 +2O RT-2.1	16	2	2O	2.1	9-HpODE	18	2	2O	5.44	-2	0	3.34	-1.24
					5,6-diHETE	20	4	2O	3.48	-4	-2	1.08	1.02
					14,15-diHETE	20	4	2O	3	-4	-2	0.6	1.5
					5,12-diHETE	20	4	2O	2.89	-4	-2	0.49	1.61
NVO 16:1 +2O RT−2.7	16	2	2O	2.7	9-HpODE	18	2	2O	5.44	-2	0	3.34	-0.64
					5,6-diHETE	20	4	2O	3.48	-4	-2	1.08	1.62
					14,15-diHETE	20	4	2O	3	-4	-2	0.6	2.1
					5,12-diHETE	20	4	2O	2.89	-4	-2	0.49	2.21
FFA 16:2 +2O RT-2.5	16	2	2O	2.5	9-HpODE	18	2	2O	5.44	-2	0	3.34	-0.84
					5,6-diHETE	20	4	2O	3.48	-4	-2	1.08	1.42
					14,15-diHETE	20	4	2O	3	-4	-2	0.6	1.9
					5,12-diHETE	20	4	2O	2.89	-4	-2	0.49	2.01
FFA 16:2 +2O RT-3.9	16	2	2O	3.9	9-HpODE	18	2	2O	5.44	-2	0	3.34	0.56
					5,6-diHETE	20	4	2O	3.48	-4	-2	1.08	2.82
					14,15-diHETE	20	4	2O	3	-4	-2	0.6	3.3
					5,12-diHETE	20	4	2O	2.89	-4	-2	0.49	3.41
FFA 16:2 +3O RT-1.6	16	2	3O	1.6	5,6,15-TriHEPE	20	5	3O	1.72	-4	-3	0.22	1.38
FFA 16:2 +3O RT-2	16	2	3O	2	5,6,15-TriHEPE	20	5	3O	1.72	-4	-3	0.22	1.78
FFA 16:2 RT-5.8	16	2		5.8	AA	20	4		8.1	-4	-2	5.7	0.1	Hexadecadienoic acid (3b)	HDE (3b)
					DHA	22	6		7.7	-6	-4	5	0.8
FFA 16:3 +1O RT-2.2	16	3	1O	2.2	9-HOTrE	18	3	1O	4.02	-2	0	1.92	0.28
FFA 16:3 +1O RT-3	16	3	1O	3	9-HOTrE	18	3	1O	4.02	-2	0	1.92	1.08
FFA 16:3 +1O RT-3.8	16	3	1O	3.8	9-HOTrE	18	3	1O	4.02	-2	0	1.92	1.88
FFA 16:3 +2O RT-2.1	16	3	2O	2.1	9-HpODE	18	2	2O	5.44	-2	1	2.44	-0.34	Hydroperoxy hexadecatrienoic acid (3b)	HpHTrE (3b)
					5,6-diHETE	20	4	2O	3.48	-4	-1	0.18	1.92
					14,15-diHETE	20	4	2O	3	-4	-1	-0.3	2.4
					5,12-diHETE	20	4	2O	2.89	-4	-1	-0.41	2.51
FFA 16:3 +2O RT-2.4	16	3	2O	2.4	9-HpODE	18	2	2O	5.44	-2	1	2.44	-0.04	Hydroperoxy hexadecatrienoic acid (3b)	HpHTrE (3b)
					5,6-diHETE	20	4	2O	3.48	-4	-1	0.18	2.22
					14,15-diHETE	20	4	2O	3	-4	-1	-0.3	2.7
					5,12-diHETE	20	4	2O	2.89	-4	-1	-0.41	2.81
FFA 16:3 +3O RT-1.6	16	3	3O	1.6	5,6,15-TriHEPE	20	5	3O	1.72	-4	-2	-0.68	2.28
FFA 16:3 RT-2.8	16	3		2.8	AA	20	4		8.1	-4	-1	4.8	-2
					DHA	22	6		7.7	-6	-3	4.1	-1.3
FFA 16:3 RT-4.2	16	3		4.2	AA	20	4		8.1	-4	-1	4.8	-0.6	Hexadecatrienoic acid (3b)	HTrE (3b)
					DHA	22	6		7.7	-6	-3	4.1	0.1
FFA 16:3 RT-4.5	16	3		4.5	AA	20	4		8.1	-4	-1	4.8	-0.3	Hexadecatrienoic acid (3b)	HTrE (3b)
					DHA	22	6		7.7	-6	-3	4.1	0.4
FFA 16:3 RT-5.9	16	3		5.9	AA	20	4		8.1	-4	-1	4.8	1.1
					DHA	22	6		7.7	-6	-3	4.1	1.8
FFA 16:3 RT-6.7	16	3		6.7	AA	20	4		8.1	-4	-1	4.8	1.9
					DHA	22	6		7.7	-6	-3	4.1	2.6
FFA 16:3 RT-7.3	16	3		7.3	AA	20	4		8.1	-4	-1	4.8	2.5
					DHA	22	6		7.7	-6	-3	4.1	3.2
FFA 16:4 +1O RT-1.8	16	4	1O	1.8	9-HOTrE	18	3	1O	4.02	-2	1	1.02	0.78
	16	4	1O	1.8	15-HETrE	20	3	1O	6.11	-4	1	1.01	0.79
	16	4	1O	1.8		20	4		5.43	-4	0	1.23	0.57
FFA 16:4 +1O RT-2.5	16	4	1O	2.5	9-HOTrE	18	3	1O	4.02	-2	1	1.02	1.48
	16	4	1O	2.5	15-HETrE	20	3	1O	6.11	-4	1	1.01	1.49
	16	4	1O	2.5	15-HETE	20	4		5.43	-4	0	1.23	1.27
					15-KETE	20	5	1O	5.24	-4	-1	1.94	0.56
FFA 16:4 +1O RT-3.1	16	4	1O	3.1	9-HOTrE	18	3	1O	4.02	-2	1	1.02	2.08
FFA 16:4 +2O RT-1.8	16	4	2O	1.8	9-HpOTrE	18	3	2O	4.28	-2	1	1.28	0.52	Hydroperoxy Hexadecatetraenoic acid (3b)	HpHTE (3b)
					13-HpTrE	18	3	2O	4.65	-2	1	1.65	0.15
					5,6-diHETE	20	4	2O	3.48	-4	0	-0.72	2.52
					14,15-diHETE	20	4	2O	3	-4	0	-1.2	3
					5,12-diHETE	20	4	2O	2.89	-4	0	-1.31	3.11
FFA 16:4 +2O RT-2.6	16	4	2O	2.6	9-HpOTrE	18	3	2O	4.28	-2	1	1.28	1.32
					13-HpTrE	18	3	2O	4.65	-2	1	1.65	0.95
					5,6-diHETE	20	4	2O	3.48	-4	0	-0.72	3.32
					14,15-diHETE	20	4	2O	3	-4	0	-1.2	3.8
					5,12-diHETE	20	4	2O	2.89	-4	0	-1.31	3.91
FFA 16:4 +3O RT-2.4	16	4	3O	2.4	5,6,15-TriHEPE	20	5	3O	1.72	-4	-1	-1.58	3.98
FFA 16:4 RT-6.1	16	4		6.1	AA	20	4		8.1	-4	0	3.9	2.2
					DHA	22	6		7.7	-6	-2	3.2	2.9
Supplemental Table 3a. Functional group annotations of features annotated as C18 fatty acids and non-volatile oxylipins. The retention times of authentic standards (RT auth) were used to predict retention times for the observed structural isomers. The difference in carbon number and difference in double bond equivalents was calculated for each observed strucutral isomer and the corresponding auth…
Observed					Standard					Calculation				Proposed Functional Group Annotation
Structural Annotation				RT obs	Structural Annotation				RT auth			RT calc	RT obs - RT calc
	#C	#DB	#O		Name	#C	#DB	#O		dC	dDB			Name	Abbrev.
FFA 18:1 +2O RT-7.2	18	1	2O	7.2	9-HpOTrE	18	3	2O	4.28	0	-2	6.08	1.12
					13-HpTrE	18	3	2O	4.65	0	-2	6.45	0.75
					5,6-diHETE	20	4	2O	3.48	-2	-3	4.08	3.12
					14,15-diHETE	20	4	2O	3	-2	-3	3.6	3.6
					5,12-diHETE	20	4	2O	2.89	-2	-3	3.49	3.71
FFA 18:1 +3O RT-1.9	18	1	3O	1.9	5,6,15-TriHEPE	20	5	3O	1.72	-2	-4	3.22	-1.32
FFA 18:2 +1O RT-5.9	18	2	1O	5.9	9-HOTrE	18	3	1O	4.02	0	-1	4.92	0.98
FFA 18:2 +2O RT-2.6	18	2	2O	2.6	9-HpOTrE	18	3	2O	4.28	0	-1	5.18	-2.58	Dihydroxy Octadecadienoic acid (3a)	diHODE (3a)
					13-HpTrE	18	3	2O	4.65	0	-1	5.55	-2.95
					5,6-diHETE	20	4	2O	3.48	-2	-2	3.18	-0.58
					14,15-diHETE	20	4	2O	3	-2	-2	2.7	-0.1
					5,12-diHETE	20	4	2O	2.89	-2	-2	2.59	0.01
FFA 18:2 +2O RT-6.3	18	2	2O	6.3	9-HpOTrE	18	3	2O	4.28	0	-1	5.18	1.12
					13-HpTrE	18	3	2O	4.65	0	-1	5.55	0.75
					5,6-diHETE	20	4	2O	3.48	-2	-2	3.18	3.12
					14,15-diHETE	20	4	2O	3	-2	-2	2.7	3.6
					5,12-diHETE	20	4	2O	2.89	-2	-2	2.59	3.71
FFA 18:2 RT-9.3	18	2		9.3	AA	20	4		8.1	-2	-2	7.8	1.5
					DHA	22	6		7.7	-4	-4	7.1	2.2
FFA 18:3 +1O RT-4.6	18	3	1O	4.6	9-HOTrE	18	3	1O	4.02	0	0	4.02	0.58
FFA 18:3 +1O RT-5.6	18	3	1O	5.6	9-HOTrE	18	3	1O	4.02	0	0	4.02	1.58
FFA 18:3 +1O RT-6.3	18	3	1O	6.3	9-HOTrE	18	3	1O	4.02	0	0	4.02	2.28
FFA 18:3 +2O RT-2	18	3	2O	2	9-HpOTrE	18	3	2O	4.28	0	0	4.28	-2.28	Dihydroxy Octadecaatrienoic acid (3b)	diHOTrE (3b)
					13-HpTrE	18	3	2O	4.65	0	0	4.65	-2.65
					5,6-diHETE	20	4	2O	3.48	-2	-1	2.28	-0.28
					14,15-diHETE	20	4	2O	3	-2	-1	1.8	0.2
					5,12-diHETE	20	4	2O	2.89	-2	-1	1.69	0.31
FFA 18:3 +3O RT-1.8	18	3	3O	1.8	5,6,15-TriHEPE	20	5	3O	1.72	-2	-2	1.42	0.38	Trihydroxy Octadecatrienoic acid (3b)	triHOTrE (3b)
FFA 18:3 RT-5.9	18	3		5.9	AA	20	4		8.1	-2	-1	6.9	-1	Octadecatrienoic acid (3b)	OTrE (3b)
					DHA	22	6		7.7	-4	-3	6.2	-0.3
FFA 18:4 +1O RT-2	18	4	1O	2	9-HOTrE	18	3	1O	4.02	0	1	3.12	-1.12
FFA 18:4 RT-4.9	18	4		4.9	AA	20	4		8.1	-2	0	6	-1.1	Octadecatetraenoic acid	OTE (3b)
					DHA	22	6		7.7	-4	-2	5.3	-0.4
FFA 18:5 +1O RT-1.6	18	5	1O	1.6	9-HOTrE	18	3	1O	4.02	0	2	2.22	-0.62
FFA 18:5 +2O RT-1.6	18	5	2O	1.6	9-HpOTrE	18	3	2O	4.28	0	2	2.48	-0.88
					13-HpTrE	18	3	2O	4.65	0	2	2.85	-1.25
					5,6-diHETE	20	4	2O	3.48	-2	1	0.48	1.12
					14,15-diHETE	20	4	2O	3	-2	1	0	1.6
					5,12-diHETE	20	4	2O	2.89	-2	1	-0.11	1.71
FFA 18:5 +2O RT-2.2	18	5	2O	2.2	9-HpOTrE	18	3	2O	4.28	0	2	2.48	-0.28	Hydroperoxy Octadecapentaenoic acid (3b)	HpOPE (3b)
					13-HpTrE	18	3	2O	4.65	0	2	2.85	-0.65
					5,6-diHETE	20	4	2O	3.48	-2	1	0.48	1.72
					14,15-diHETE	20	4	2O	3	-2	1	0	2.2
					5,12-diHETE	20	4	2O	2.89	-2	1	-0.11	2.31
FFA 18:5 +3O RT-2.6	18	4	3O	2.6	5,6,15-TriHEPE	20	5	3O	1.72	-2	-1	0.52	2.08
FFA 18:5 +3O RT-3.1	18	4	3O	3.1	5,6,15-TriHEPE	20	5	3O	1.72	-2	-1	0.52	2.58
Supplemental Table 3a. Functional group annotations of features annotated as C20 fatty acids and non-volatile oxylipins. The retention times of authentic standards (RT auth) were used to predict retention times for the observed structural isomers. The difference in carbon number and difference in double bond equivalents was calculated for each observed strucutral isomer and the corresponding auth…
Observed					Standard					Calculation				Proposed Functional Group Annotation
Structural Annotation				RT obs	Structural Annotation				RT auth			RT calc	RT obs - RT calc
	#C	#DB	#O		Name	#C	#DB	#O		dC	dDB			Name	Abbrev.
FFA 20:1 +1O RT-8.3	20	1	1O	8.3	15-HETrE	20	3	1O	6.11	0	-2	7.91	0.39	Hydroxy eicosanoic acid (3b)	HEA (3b)
FFA 20:1 +3O RT-1.6	20	1	3O	1.6	5,6,15-TriHEPE	20	5	3O	1.72	0	-4	5.32	-3.72
FFA 20:2 +2O RT-9.3	20	1	1O	8.3	5-HpETE	20	4	2O	5.01	0	-3	7.71	0.59	Hydroperoxy eicosadienoic acid (3b)	HpEDE (3b)
					12-HpETE	20	4	2O	5.95	0	-3	8.65	-0.35
					15-HpETE	20	4	2O	5.73	0	-3	8.43	-0.13
					5,6-diHETE	20	4	2O	3.48	0	-3	6.18	2.12
					14,15-diHETE	20	4	2O	3	0	-3	5.7	2.6
					5,12-diHETE	20	4	2O	2.89	0	-3	5.59	2.71
FFA 20:2 +3O RT-5.7	20	2	3O	5.7	5,6,15-TriHEPE	20	5	3O	1.72	0	-3	4.42	1.28
FFA 20:3 +1O RT-8.1	20	3	1O	8.1	15-HETrE	20	3	1O	6.11	0	0	6.11	1.99
FFA 20:3 +2O RT-2.7	20	3	2O	2.7	5-HpETE	20	4	2O	5.01	0	-1	5.91	-3.21
					12-HpETE	20	4	2O	5.95	0	-1	6.85	-4.15
					15-HpETE	20	4	2O	5.73	0	-1	6.63	-3.93
					5,6-diHETE	20	4	2O	3.48	0	-1	4.38	-1.68
					14,15-diHETE	20	4	2O	3	0	-1	3.9	-1.2
					5,12-diHETE	20	4	2O	2.89	0	-1	3.79	-1.09
FFA 20:3 +2O RT-7.5	20	3	2O	7.5	5-HpETE	20	4	2O	5.01	0	-1	5.91	1.59
					12-HpETE	20	4	2O	5.95	0	-1	6.85	0.65
					15-HpETE	20	4	2O	5.73	0	-1	6.63	0.87
					5,6-diHETE	20	4	2O	3.48	0	-1	4.38	3.12
					14,15-diHETE	20	4	2O	3	0	-1	3.9	3.6
					5,12-diHETE	20	4	2O	2.89	0	-1	3.79	3.71
FFA 20:4 +1O RT-2.7	20	4	1O	2.7	15-HETrE	20	3	1O	6.11	0	1	5.21	-2.51
FFA 20:4 +2O RT-1.8	20	4	2O	1.8	5-HpETE	20	4	2O	5.01	0	0	5.01	-3.21
					12-HpETE	20	4	2O	5.95	0	0	5.95	-4.15
					15-HpETE	20	4	2O	5.73	0	0	5.73	-3.93
					5,6-diHETE	20	4	2O	3.48	0	0	3.48	-1.68
					14,15-diHETE	20	4	2O	3	0	0	3	-1.2
					5,12-diHETE	20	4	2O	2.89	0	0	2.89	-1.09
FFA 20:4 +2O RT-2.6	20	4	2O	2.6	5-HpETE	20	4	2O	5.01	0	0	5.01	-2.41	Dihydroxy eicosatetraenoic acid (2b)	diHETE (2b)
					12-HpETE	20	4	2O	5.95	0	0	5.95	-3.35
					15-HpETE	20	4	2O	5.73	0	0	5.73	-3.13
					5,6-diHETE	20	4	2O	3.48	0	0	3.48	-0.88
					14,15-diHETE	20	4	2O	3	0	0	3	-0.4
					5,12-diHETE	20	4	2O	2.89	0	0	2.89	-0.29
FFA 20:4 +2O RT-6.5	20	4	2O	6.5	5-HpETE	20	4	2O	5.01	0	0	5.01	1.49
					12-HpETE	20	4	2O	5.95	0	0	5.95	0.55
					15-HpETE	20	4	2O	5.73	0	0	5.73	0.77
					5,6-diHETE	20	4	2O	3.48	0	0	3.48	3.02
					14,15-diHETE	20	4	2O	3	0	0	3	3.5
					5,12-diHETE	20	4	2O	2.89	0	0	2.89	3.61
FFA 20:4 +3O RT-2.5	20	4	3O	2.5	5,6,15-TriHEPE	20	5	3O	1.72	0	-1	2.62	-0.12	Trihydroxy eicosatetraenoic acid (3b)	triHETE (3b)
FFA 20:4 +3O RT-3.1	20	4	3O	3.1	5,6,15-TriHEPE	20	5	3O	1.72	0	-1	2.62	0.48	Trihydroxy eicosatetraenoic acid (3b)	triHETE (3b)
FFA 20:4 +3O RT-4.1	20	4	3O	4.1	5,6,15-TriHEPE	20	5	3O	1.72	0	-1	2.62	1.48
FFA 20:5 +1O RT-3.6	20	5	1O	3.6	15-HETrE	20	3	1O	6.11	0	2	4.31	-0.71
FFA 20:5 +1O RT-4.3	20	5	1O	4.3	15-HETrE	20	3	1O	6.11	0	2	4.31	-0.01	Hydroxy eicosapentaenoic acid (3a)	HEPE (3a)
FFA 20:5 +1O RT-6.4	20	5	1O	6.4	15-HETrE	20	3	1O	6.11	0	2	4.31	2.09
FFA 20:5 +2O RT-2.2	20	5	1O	2.2	5-HpETE	20	4	2O	5.01	0	1	4.11	-1.91
					12-HpETE	20	4	2O	5.95	0	1	5.05	-2.85
					15-HpETE	20	4	2O	5.73	0	1	4.83	-2.63
					5,6-diHETE	20	4	2O	3.48	0	1	2.58	-0.38
					14,15-diHETE	20	4	2O	3	0	1	2.1	0.1
					5,12-diHETE	20	4	2O	2.89	0	1	1.99	0.21
FFA 20:5 +2O RT-2.2	20	5	1O	5.3	5-HpETE	20	4	2O	5.01	0	1	4.11	1.19
					12-HpETE	20	4	2O	5.95	0	1	5.05	0.25
					15-HpETE	20	4	2O	5.73	0	1	4.83	0.47
					5,6-diHETE	20	4	2O	3.48	0	1	2.58	2.72
					14,15-diHETE	20	4	2O	3	0	1	2.1	3.2
					5,12-diHETE	20	4	2O	2.89	0	1	1.99	3.31
FFA 20:5 +3O RT-1.8	20	5	3O	1.8	5,6,15-TriHEPE	20	5	3O	1.72	0	0	1.72	0.08	Trihydroxy eicosapentaenoic acid (2b)	triHEPE (2b)
Supplemental Table 3a. Functional group annotations of features annotated as long-chain (C22 >) fatty acids and non-volatile oxylipins. The retention times of authentic standards (RT auth) were used to predict retention times for the observed structural isomers. The difference in carbon number and difference in double bond equivalents was calculated for each observed strucutral isomer and the cor…
Observed					Standard					Calculation				Proposed Functional Group Annotation
Structural Annotation				RT obs	Structural Annotation				RT auth			RT calc	RT obs - RT calc
	#C	#DB	#O		Name	#C	#DB	#O		dC	dDB			Name	Abbrev.
FFA 22:1 +1O RT-8.9	22	1	1O	8.9	15-HEPE	20	5	1O	4.56	2	-4	10.26	-1.36
FFA 22:1 RT-12.9	22	1		12.9	AA	20	4		8.1	2	-3	12.9	0	Docosenoic acid (3a)	DoA (3a)
					DHA	22	6		7.7	0	-5	12.2	0.7
FFA 22:2 +3O RT-8	22	2	3O	8	5,6,15-TriHEPE	20	5	3O	1.72	2	-3	6.52	1.48
FFA 22:3 +1O RT-8.8	22	3	1O	8.8	15-HEPE	20	5	1O	4.56	2	-2	8.46	0.34	Hydroxy Docosatrienoic acid	HDoTrE (3b)
FFA 22:3 +3O RT-2.4	22	3	3O	2.4	5,6,15-TriHEPE	20	5	3O	1.72	2	-2	5.62	-3.22
FFA 22:3 RT-5.2	22	3		5.2	AA	20	4		8.1	2	-1	11.1	-5.9
					DHA	22	6		7.7	0	-3	10.4	-5.2
FFA 22:5 +2O RT-9.3	22	5	2O	9.3	5-HpETE	20	4	2O	5.01	2	1	6.21	3.09
					12-HpETE	20	4	2O	5.95	2	1	7.15	2.15
					15-HpETE	20	4	2O	5.73	2	1	6.93	2.37
					5,6-diHETE	20	4	2O	3.48	2	1	4.68	4.62
					14,15-diHETE	20	4	2O	3	2	1	4.2	5.1
					5,12-diHETE	20	4	2O	2.89	2	1	4.09	5.21
FFA 22:5 +3O RT-2.2	22	5	3O	2.2	5,6,15-TriHEPE	20	5	3O	1.72	2	0	3.82	-1.62
FFA 22:5 +3O RT-5.9	22	5	3O	5.9	5,6,15-TriHEPE	20	5	3O	1.72	2	0	3.82	2.08
FFA 22:6 +1O RT-6.1	22	6	1O	6.1	15-HEPE	20	5	1O	4.56	2	1	5.76	0.34	Hydroxy Docosahexaenoic acid (3b)	HDoHE (3b)
FFA 22:6 +1O RT-7.5	22	6	1O	7.5	15-HEPE	20	5	1O	4.56	2	1	5.76	1.74
FFA 22:6 +2O RT-1.8	22	6	2O	1.8	5-HpETE	20	4	2O	5.01	2	2	5.31	-3.51
					12-HpETE	20	4	2O	5.95	2	2	6.25	-4.45
					15-HpETE	20	4	2O	5.73	2	2	6.03	-4.23
					5,6-diHETE	20	4	2O	3.48	2	2	3.78	-1.98
					14,15-diHETE	20	4	2O	3	2	2	3.3	-1.5
					5,12-diHETE	20	4	2O	2.89	2	2	3.19	-1.39
FFA 22:6 +2O RT-3.8	22	6	2O	3.8	5-HpETE	20	4	2O	5.01	2	2	5.31	-1.51	Dihydroxy Docosahexaenoic acid (3a)	diHDoHE (3a)
					12-HpETE	20	4	2O	5.95	2	2	6.25	-2.45
					15-HpETE	20	4	2O	5.73	2	2	6.03	-2.23
					5,6-diHETE	20	4	2O	3.48	2	2	3.78	0.02
					14,15-diHETE	20	4	2O	3	2	2	3.3	0.5
					5,12-diHETE	20	4	2O	2.89	2	2	3.19	0.61
FFA 22:6 +2O RT-4.2	22	6	2O	4.2	5-HpETE	20	4	2O	5.01	2	2	5.31	-1.11	Dihydroxy Docosahexaenoic acid (3b)	diHDoHE (3b)
					12-HpETE	20	4	2O	5.95	2	2	6.25	-2.05
					15-HpETE	20	4	2O	5.73	2	2	6.03	-1.83
					5,6-diHETE	20	4	2O	3.48	2	2	3.78	0.42
					14,15-diHETE	20	4	2O	3	2	2	3.3	0.9
					5,12-diHETE	20	4	2O	2.89	2	2	3.19	1.01
FFA 22:6 +2O RT-5.8	22	6	2O	5.8	5-HpETE	20	4	2O	5.01	2	2	5.31	0.49	Hydroperoxy Docosahexaenoic acid (3b)	HpDoHE (3b)
					12-HpETE	20	4	2O	5.95	2	2	6.25	-0.45
					15-HpETE	20	4	2O	5.73	2	2	6.03	-0.23
					5,6-diHETE	20	4	2O	3.48	2	2	3.78	2.02
					14,15-diHETE	20	4	2O	3	2	2	3.3	2.5
					5,12-diHETE	20	4	2O	2.89	2	2	3.19	2.61
FFA 22:6 +2O RT-6.5	22	6	2O	6.5	5-HpETE	20	4	2O	5.01	2	2	5.31	1.19	Hydroperoxy Docosahexaenoic acid (3b)	HpDoHE (3b)
					12-HpETE	20	4	2O	5.95	2	2	6.25	0.25
					15-HpETE	20	4	2O	5.73	2	2	6.03	0.47
					5,6-diHETE	20	4	2O	3.48	2	2	3.78	2.72
					14,15-diHETE	20	4	2O	3	2	2	3.3	3.2
					5,12-diHETE	20	4	2O	2.89	2	2	3.19	3.31
FFA 22:6 +2O RT-7.7	22	6	2O	7.7	5-HpETE	20	4	2O	5.01	2	2	5.31	2.39
					12-HpETE	20	4	2O	5.95	2	2	6.25	1.45
					15-HpETE	20	4	2O	5.73	2	2	6.03	1.67
					5,6-diHETE	20	4	2O	3.48	2	2	3.78	3.92
					14,15-diHETE	20	4	2O	3	2	2	3.3	4.4
					5,12-diHETE	20	4	2O	2.89	2	2	3.19	4.51
FFA 22:6 +3O RT-2.1	22	6	3O	2.1	5,6,15-TriHEPE	20	5	3O	1.72	2	1	2.92	-0.82
FFA 24:0 RT-15.7	24	0		15.7	AA	20	4		8.1	4	-4	15.9	-0.2	Tetracosanoic acid (3b)	TA (3b)
					DHA	22	6		7.7	2	-6	15.2	0.5
FFA 24:1 +1O RT-10.1	24	1	1O	10.1	15-HEPE	20	5	1O	4.56	4	-4	12.36	-2.26
FFA 26:1 +2O RT-10.9	26	1	2O	10.9	5-HpETE	20	4	2O	5.01	6	-3	14.01	-3.11
					12-HpETE	20	4	2O	5.95	6	-3	14.95	-4.05
					15-HpETE	20	4	2O	5.73	6	-3	14.73	-3.83
					5,6-diHETE	20	4	2O	3.48	6	-3	12.48	-1.58
					14,15-diHETE	20	4	2O	3	6	-3	12	-1.1
					5,12-diHETE	20	4	2O	2.89	6	-3	11.89	-0.99
Supplemental Table 3a. Elemental formulas of features annotated as PUAs. The retention times of authentic standards (RT auth) were used to predict retention times for the observed structural isomers. The difference in carbon number and difference in double bond equivalents was calculated for each observed strucutral isomer and the corresponding authentic standard. Equation (1) was applied to dete…
Observed					Standard					Calculation				Annotation/Elemental Formula	Abbrev.
Structural Annotation				RT obs	Structural Annotation				RT auth			RT calc	RT obs - RT calc
	#C	#DB	#O		Name	#C	#DB	#O		dC	dDB
PUA 10:2 RT-1.6	10	2		1.6	DD	10	2		3.65	0	0	3.65	-2.05	C10H16O
PUA 10:3 RT-1.2	10	3		1.2	DD	10	2		3.65	0	1	2.75	-1.55	C10H14O
PUA 10:3 RT-1.6	10	3		1.6	DD	10	2		3.65	0	1	2.75	-1.15	C10H14O
PUA 10:4 RT-1.7	10	4		1.7	DD	10	2		3.65	0	2	1.85	-0.15	Decatetraenal	DT (3b)
PUA 12:1 RT-1.7	12	1		1.7	DD	10	2		3.65	2	-1	6.65	-4.95	C12H22O
PUA 12:1 RT-3.4	12	1		3.4	DD	10	2		3.65	2	-1	6.65	-3.25	C12H22O
PUA 12:2 RT-1.7	12	2		1.7	DD	10	2		3.65	2	0	5.75	-4.05	C12H20O
PUA 12:2 RT-2	12	2		2	DD	10	2		3.65	2	0	5.75	-3.75	C12H20O
PUA 12:2 RT-3.1	12	2		3.1	DD	10	2		3.65	2	0	5.75	-2.65	C12H20O
PUA 12:3 RT-5.3	12	3		5.3	DD	10	2		3.65	2	1	4.85	0.45	Dodecatrienal	DDTr (3b)
PUA 12:4 RT-1.2	12	4		1.2	DD	10	2		3.65	2	2	3.95	-2.75	C12H16O
PUA 12:4 RT-1.7	12	4		1.7	DD	10	2		3.65	2	2	3.95	-2.25	C12H16O
PUA 12:4 RT-1.9	12	4		1.9	DD	10	2		3.65	2	2	3.95	-2.05	C12H16O
PUA 12:5 RT-5.3	12	5		5.3	DD	10	2		3.65	2	3	3.05	2.25	C12H14O
PUA 12:5 +1O RT	1.6			C12H14O2	C12H14O2 RT-1.6
PUA 12:5 +2O RT	1.5			C12H14O3	C12H14O3 RT-1.5
PUA 12:5 +2O RT	2.1			C12H14O3	C12H14O3 RT-2.1
PUA 12:5 +2O RT	2.1			C12H14O3	C12H14O3 RT-2.1
PUA 12:5 +3O RT	1.4			C12H14O4	C12H14O4 RT-1.4
PUA 12:5 +3O RT	1.4			C12H14O4	C12H14O4 RT-1.4
PUA 12:5 +4O RT	1.3			C12H14O5	C12H14O5 RT-1.3
PUA 6:1 +3O RT	1.3			C6H10O4	C6H10O4 RT-1.3
PUA 6:1 +3O RT	1.7			C6H10O4	C6H10O4 RT-1.7
PUA 6:1 +4O RT	2			C6H10O5	C6H10O5 RT-2
PUA 6:1 +4O RT	5.5			C6H10O5	C6H10O5 RT-5.5
PUA 8:0 +2O RT	1.6			C8H16O3	C8H16O3 RT-1.6
PUA 8:0 +2O RT	1.6			C8H16O3	C8H16O3 RT-1.6
PUA 8:0 +3O RT	1.4			C8H16O4	C8H16O4 RT-1.4
PUA 8:0 +4O RT	1.3			C8H16O5	C8H16O5 RT-1.3
PUA 8:1 +1O RT	1.6			C8H14O2	C8H14O2 RT-1.6
PUA 8:1 +1O RT	2.2			C8H14O2	C8H14O2 RT-2.2
PUA 8:1 +2O RT	1.5			C8H14O3	C8H14O3 RT-1.5
PUA 8:1 +2O RT	1.5			C8H14O3	C8H14O3 RT-1.5
PUA 8:1 +3O RT	1.3			C8H14O4	C8H14O4 RT-1.3
PUA 8:1 +3O RT	2.7			C8H14O4	C8H14O4 RT-2.7
PUA 8:1 +4O RT	1.8			C8H14O5	C8H14O5 RT-1.8
PUA 8:1 +4O RT	2.2			C8H14O5	C8H14O5 RT-2.2
PUA 8:2 +1O RT	1.5			C8H12O2	C8H12O2 RT-1.5
PUA 8:2 +1O RT	1.5			C8H12O2	C8H12O2 RT-1.5
PUA 8:2 +1O RT	1.9			C8H12O2	C8H12O2 RT-1.9
PUA 8:2 +1O RT	2			C8H12O2	C8H12O2 RT-2
PUA 8:3 +2O RT	1.4			C8H12O3	C8H12O3 RT-1.4
PUA 8:3 +2O RT	1.5			C8H12O3	C8H12O3 RT-1.5
PUA 8:3 +2O RT	2.3			C8H12O3	C8H12O3 RT-2.3
