# Supplementary material for: Viral Infection Leads to a Unique Suite of Allelopathic Chemical Signals in Three Diatom Host–Virus Pairs
Source: Mar Drugs. 2024 May 17;22(5):228. doi: 10.3390/md22050228 (PMC11123003; doi:10.3390/md22050228)
Supplement: Supplementary file 1 [file marinedrugs-22-00228-s001.zip › Supplemental Table S4 Annotation Table for CS RNAV March 2024b.xlsx]

## Sheet: Sheet12
Supplemental Table 4a. Functional group annotations of features annotated as small (<C14) fatty acids and non-volatile oxylipins in C. socialis + RNA virus experiments. The retention times of authentic standards (RT auth) were used to predict retention times for the observed structural isomers. The difference in carbon number and difference in double bond equivalents was calculated for each obser…
Observed					Standard					Calculation				Proposed Functional Group Annotation
Structural Annotation				RT obs	Structural Annotation				RT auth			RT calc	RT obs - RT calc
	#C	#DB	#O		Name	#C	#DB	#O		dC	dDB			Name	Abbrev.
FFA 14:2 RT−2.6	14	2		2.6	Octanoic acid	8	0		2.65	6	2	7.15	-4.55
NVO 14:0 +2O RT−7	14	0	2O	7	9-HpODE	18	2	2O	5.44	-4	-2	3.04	3.96
NVO 14:1 +1O RT−2.9	14	1	1O	2.9	9-HOTrE	18	3	1O	4.02	-4	-2	1.62	1.28
NVO 14:1 +1O RT−5.1	14	1	1O	5.1	9-HOTrE	18	3	1O	4.02	-4	-2	1.62	3.48
NVO 14:1 +2O RT−1.8	14	1	2O	1.8	9-HpODE	18	2	2O	5.44	-4	-1	2.14	-0.34	Hydroperoxy Tetradecaenoic acid (3b)	HpTE (3b)
NVO 14:1 +2O RT−3	14	1	2O	3	9-HpODE	18	2	2O	5.44	-4	-1	2.14	0.86
NVO 14:1 +3O RT−1.5	14	1	3O	1.5	5,6,15-TriHEPE	20	5	3O	1.72	-6	-4	-0.98	2.48
NVO 14:2 +1O RT−1.7	14	2	1O	1.7	9-HOTrE	18	3	1O	4.02	-4	-1	0.72	0.98
NVO 14:2 +1O RT−2.6	14	2	1O	2.6	9-HOTrE	18	3	1O	4.02	-4	-1	0.72	1.88
NVO 14:2 +1O RT−3.7	14	2	1O	3.7	9-HOTrE	18	3	1O	4.02	-4	-1	0.72	2.98
NVO 14:2 +2O RT−3	14	2	2O	3	9-HpODE	18	2	2O	5.44	-4	0	1.24	1.76
NVO 14:2 +3O RT−1.4	14	2	3O	1.4	5,6,15-TriHEPE	20	5	3O	1.72	-6	-3	-1.88	3.28
NVO 14:2 +3O RT−1.9	14	2	3O	1.9	5,6,15-TriHEPE	20	5	3O	1.72	-6	-3	-1.88	3.78
Supplemental Table 4b. Functional group annotations of features annotated as C16 fatty acids and non-volatile oxylipins. The retention times of authentic standards (RT auth) were used to predict retention times for the observed structural isomers. The difference in carbon number and difference in double bond equivalents was calculated for each observed strucutral isomer and the corresponding auth…
Observed					Standard					Calculation				Proposed Functional Group Annotation
Structural Annotation				RT obs	Structural Annotation				RT auth			RT calc	RT obs - RT calc
	#C	#DB	#O		Name	#C	#DB	#O		dC	dDB			Name	Abbrev.
FFA 16:3 RT−2.8	16	3		2.8	AA	20	4		8.1	-4	-1	4.8	-2
	16	3		2.8	DHA	22	6		7.7	-6	-3	4.1	-1.3
FFA 16:3 RT−6.4	16	3		6.4	AA	20	4		8.1	-4	-1	4.8	1.6
	16	3		6.4	DHA	22	6		7.7	-6	-3	4.1	2.3
FFA 16:4 RT−2.6	16	4		2.6	AA	20	4		8.1	-4	0	3.9	-1.3
	16	4		2.6	DHA	22	6		7.7	-6	-2	3.2	-0.6
NVO 16:0 +2O RT−2.1	16	0	2O	2.1	9-HpODE	18	2	2O	5.44	-2	-2	5.14	-3.04	Dihydroxy Hexadecanoic acid (3b)	diHHA (3b)
					5,6-diHETE	20	4	2O	3.48	-4	-4	2.88	-0.78
					14,15-diHETE	20	4	2O	3	-4	-4	2.4	-0.3
					5,12-diHETE	20	4	2O	2.89	-4	-4	2.29	-0.19
NVO 16:0 +2O RT−2.6	16	0	2O	2.6	9-HpODE	18	2	2O	5.44	-2	-2	5.14	-2.54	Dihydroxy Hexadecanoic acid (3b)	diHHA (3b)
					5,6-diHETE	20	4	2O	3.48	-4	-4	2.88	-0.28
					14,15-diHETE	20	4	2O	3	-4	-4	2.4	0.2
					5,12-diHETE	20	4	2O	2.89	-4	-4	2.29	0.31
NVO 16:0 +2O RT−3.2	16	0	2O	3.2	9-HpODE	18	2	2O	5.44	-2	-2	5.14	-1.94	Dihydroxy Hexadecanoic acid (3b)	diHHA (3b)
					5,6-diHETE	20	4	2O	3.48	-4	-4	2.88	0.32
					14,15-diHETE	20	4	2O	3	-4	-4	2.4	0.8
					5,12-diHETE	20	4	2O	2.89	-4	-4	2.29	0.91
NVO 16:0 +2O RT−4.1	16	0	2O	4.1	9-HpODE	18	2	2O	5.44	-2	-2	5.14	-1.04
					5,6-diHETE	20	4	2O	3.48	-4	-4	2.88	1.22
					14,15-diHETE	20	4	2O	3	-4	-4	2.4	1.7
					5,12-diHETE	20	4	2O	2.89	-4	-4	2.29	1.81
NVO 16:0 +3O RT−1.7	16	0	3O	1.7	5,6,15-TriHEPE	20	5	3O	1.72	-4	-5	2.02	-0.32	Trihydroxy hexadecanoic acid (3b)	triHHA (3b)
NVO 16:0 +3O RT−3	16	0	3O	3	5,6,15-TriHEPE	20	5	3O	1.72	-4	-5	2.02	0.98
NVO 16:1 +1O RT-4.4	16	1	1O	4.4	9-HOTrE	18	3	1O	4.02	-2	-2	3.72	0.68
					15-HETrE	20	3	1O	6.11	-4	-2	3.71	0.69
					15-HETE	20	4		5.43	-4	-3	3.93	0.47
					15-HEPE	20	5		4.6	-4	-4	4	0.4
					15-KETE	20	5	1O	5.24	-4	-4	4.64	-0.24
NVO 16:1 +2O RT−2.1	16	1	2O	2.1	9-HpODE	18	2	2O	5.44	-2	-1	4.24	-2.14	Dihydroxy Hexadecaenoic acid (3b)	diHHME (3b)
					5,6-diHETE	20	4	2O	3.48	-4	-3	1.98	0.12
					14,15-diHETE	20	4	2O	3	-4	-3	1.5	0.6
					5,12-diHETE	20	4	2O	2.89	-4	-3	1.39	0.71
NVO 16:1 +2O RT−2.7	16	1	2O	2.7	9-HpODE	18	2	2O	5.44	-2	-1	4.24	-1.54
					5,6-diHETE	20	4	2O	3.48	-4	-3	1.98	0.72
					14,15-diHETE	20	4	2O	3	-4	-3	1.5	1.2
					5,12-diHETE	20	4	2O	2.89	-4	-3	1.39	1.31
NVO 16:1 +2O RT−4.5	16	1	2O	4.5	9-HpODE	18	2	2O	5.44	-2	-1	4.24	0.26	Hydroperoxy hexadecaenoic acid (3b)	HpHME (3b)
					5,6-diHETE	20	4	2O	3.48	-4	-3	1.98	2.52
					14,15-diHETE	20	4	2O	3	-4	-3	1.5	3
					5,12-diHETE	20	4	2O	2.89	-4	-3	1.39	3.11
NVO 16:1 +3O RT−1.6	16	1	3O	1.6	5,6,15-TriHEPE	20	5	3O	1.72	-4	-4	1.12	0.48	Trihydroxy hexadecaenoic acid (3b)	triHHME (3b)
NVO 16:1 +3O RT−2.5	16	1	3O	2.5	5,6,15-TriHEPE	20	5	3O	1.72	-4	-4	1.12	1.38
NVO 16:1 +3O RT−2.7	16	1	3O	2.7	5,6,15-TriHEPE	20	5	3O	1.72	-4	-4	1.12	1.58
NVO 16:2 +1O RT−2.2	16	2	1O	2.2	9-HOTrE	18	3	1O	4.02	-2	-1	2.82	-0.62
NVO 16:2 +1O RT−3	16	2	1O	3	9-HOTrE	18	3	1O	4.02	-2	-1	2.82	0.18	Hydroxy hexadecadienoic acid (3b)	HHDE (3b)
					15-KETE	20	5	1O	5.24	-4	-3	3.74	-0.74
NVO 16:2 +1O RT−3.4	16	2	1O	3.4	9-HOTrE	18	3	1O	4.02	-2	-1	2.82	0.58
					15-HETrE	20	3	1O	6.11	-4	-1	2.81	0.59
					15-HETE	20	4		5.43	-4	-2	3.03	0.37
					15-HEPE	20	5		4.6	-4	-3	3.1	0.3
					15-KETE	20	5	1O	5.24	-4	-3	3.74	-0.34
NVO 16:2 +1O RT−4.3	16	2	1O	4.3	9-HOTrE	18	3	1O	4.02	-2	-1	2.82	1.48
					15-HETrE	20	3	1O	6.11	-4	-1	2.81	1.49
					15-HETE	20	4		5.43	-4	-2	3.03	1.27
					15-HEPE	20	5		4.6	-4	-3	3.1	1.2
					15-KETE	20	5	1O	5.24	-4	-3	3.74	0.56
NVO 16:2 +2O RT−2.4	16	2	2O	2.4	9-HpODE	18	2	2O	5.44	-2	0	3.34	-0.94
					5,6-diHETE	20	4	2O	3.48	-4	-2	1.08	1.32
					14,15-diHETE	20	4	2O	3	-4	-2	0.6	1.8
					5,12-diHETE	20	4	2O	2.89	-4	-2	0.49	1.91
NVO 16:2 +2O RT−5.2	16	2	2O	5.2	9-HpODE	18	2	2O	5.44	-2	0	3.34	1.86
					5,6-diHETE	20	4	2O	3.48	-4	-2	1.08	4.12
					14,15-diHETE	20	4	2O	3	-4	-2	0.6	4.6
					5,12-diHETE	20	4	2O	2.89	-4	-2	0.49	4.71
NVO 16:2 +3O RT−1.6	16	2	3O	1.6	5,6,15-TriHEPE	20	5	3O	1.72	-4	-3	0.22	1.38
NVO 16:3 +1O RT−1.8	16	3	1O	1.8	9-HOTrE	18	3	1O	4.02	-2	0	1.92	-0.12	Hydroxy hexadecatrienoic acid (3b)	HHTrE (3b)
NVO 16:3 +1O RT−2.1	16	3	1O	2.1	9-HOTrE	18	3	1O	4.02	-2	0	1.92	0.18	Hydroxy hexadecatrienoic acid (3b)	HHTrE (3b)
NVO 16:3 +1O RT−2.9	16	3	1O	2.9	9-HOTrE	18	3	1O	4.02	-2	0	1.92	0.98
NVO 16:3 +1O RT−3.3	16	3	1O	3.3	9-HOTrE	18	3	1O	4.02	-2	0	1.92	1.38
NVO 16:3 +1O RT−3.8	16	3	1O	3.8	9-HOTrE	18	3	1O	5.02	-2	0	2.92	0.88
					15-HETrE	20	3	1O	6.11	-4	0	1.91	1.89
					15-HETE	20	4	1O	5.43	-4	-1	2.13	1.67
					9-HOTrE	18	3	1O	4.02	-18	-3	-12.18	12.18
					15-HETrE	20	3	1O	6.11	-20	-3	-12.19	12.19
NVO 16:3 +1O RT−4.2	16	3	1O	4.2	9-HOTrE	18	3	1O	4.02	-2	0	1.92	2.28
NVO 16:3 +1O RT−5.2	16	3	1O	5.2	9-HOTrE	18	3	1O	4.02	-2	0	1.92	3.28
NVO 16:3 +1O RT−5.7	16	3	1O	5.7	9-HOTrE	18	3	1O	4.02	-2	0	1.92	3.78
NVO 16:3 +2O RT−2.1	16	3	2O	2.1	9-HpOTrE	18	3	2O	4.28	-2	0	2.18	-0.08	Hydroperoxy hexadecatrienoic acid (3b)	HpHTrE (3b)
					13-HpTrE	18	3	2O	4.65	-2	0	2.55	-0.45
					5,6-diHETE	20	4	2O	3.48	-4	-1	0.18	1.92
					14,15-diHETE	20	4	2O	3	-4	-1	-0.3	2.4
					5,12-diHETE	20	4	2O	2.89	-4	-1	-0.41	2.51
NVO 16:3 +2O RT−3.7	16	3	2O	3.7	9-HpOTrE	18	3	2O	4.28	-2	0	2.18	1.52
					13-HpTrE	18	3	2O	4.65	-2	0	2.55	1.15
					5,6-diHETE	20	4	2O	3.48	-4	-1	0.18	3.52
					14,15-diHETE	20	4	2O	3	-4	-1	-0.3	4
					5,12-diHETE	20	4	2O	2.89	-4	-1	-0.41	4.11
NVO 16:3 +2O RT−4.3	16	3	2O	4.3	9-HpOTrE	18	3	2O	4.28	-2	0	2.18	2.12
					13-HpTrE	18	3	2O	4.65	-2	0	2.55	1.75
					5,6-diHETE	20	4	2O	3.48	-4	-1	0.18	4.12
					14,15-diHETE	20	4	2O	3	-4	-1	-0.3	4.6
					5,12-diHETE	20	4	2O	2.89	-4	-1	-0.41	4.71
NVO 16:3 +3O RT−1.5	16	3	3O	1.5	5,6,15-TriHEPE	20	5	3O	1.72	-4	-2	-0.68	2.18
NVO 16:3 +3O RT−2.1	16	3	3O	2.1	5,6,15-TriHEPE	20	5	3O	1.72	-4	-2	-0.68	2.78
NVO 16:4 +1O RT−2.5	16	4	1O	2.5	9-HOTrE	18	3	1O	4.02	-2	1	1.02	1.48
					15-HETrE	20	3	1O	6.11	-4	1	1.01	1.49
					15-HETE	20	4	1O	5.43	-4	0	1.23	1.27
					15-HEPE	20	5	1O	4.6	-4	-1	1.3	1.2
					15-KETE	20	5	1O	5.24	-4	-1	1.94	0.56
NVO 16:4 +1O RT−3.1	16	4	1O	3.1	9-HOTrE	18	3	1O	4.02	-2	1	1.02	2.08
					15-HETrE	20	3	1O	6.11	-4	1	1.01	2.09
					15-HETE	20	4	1O	5.43	-4	0	1.23	1.87
					15-HEPE	20	5	1O	4.6	-4	-1	1.3	1.8
					15-KETE	20	5	1O	5.24	-4	-1	1.94	1.16
NVO 16:4 +1O RT−4.1	16	4	1O	4.1	9-HOTrE	18	3	1O	4.02	-2	1	1.02	3.08
NVO 16:4 +2O RT−1.3	16	4	2O	1.3	9-HpOTrE	18	3	2O	4.28	-2	1	1.28	0.02	Hydroperoxy Hexadecatetraenoic acid (3a)	HpHTE (3a)
					13-HpTrE	18	3	2O	4.65	-2	1	1.65	-0.35
					5,6-diHETE	20	4	2O	3.48	-4	0	-0.72	2.02
					14,15-diHETE	20	4	2O	3	-4	0	-1.2	2.5
					5,12-diHETE	20	4	2O	2.89	-4	0	-1.31	2.61
NVO 16:4 +2O RT−1.8	16	4	2O	1.8	9-HpOTrE	18	3	2O	4.28	-2	1	1.28	0.52	Hydroperoxy Hexadecatetraenoic acid (3b)	HpHTE (3b)
					13-HpTrE	18	3	2O	4.65	-2	1	1.65	0.15
					5,6-diHETE	20	4	2O	3.48	-4	0	-0.72	2.52
					14,15-diHETE	20	4	2O	3	-4	0	-1.2	3
					5,12-diHETE	20	4	2O	2.89	-4	0	-1.31	3.11
NVO 16:4 +2O RT−2.6	16	4	2O	2.6	9-HpOTrE	18	3	2O	4.28	-2	1	1.28	1.32
					13-HpTrE	18	3	2O	4.65	-2	1	1.65	0.95
					5,6-diHETE	20	4	2O	3.48	-4	0	-0.72	3.32
					14,15-diHETE	20	4	2O	3	-4	0	-1.2	3.8
					5,12-diHETE	20	4	2O	2.89	-4	0	-1.31	3.91
NVO 16:4 +2O RT−9.8	16	4	2O	9.8	9-HpOTrE	18	3	2O	4.28	-2	1	1.28	8.52
					13-HpTrE	18	3	2O	4.65	-2	1	1.65	8.15
					5,6-diHETE	20	4	2O	3.48	-4	0	-0.72	10.52
					14,15-diHETE	20	4	2O	3	-4	0	-1.2	11
					5,12-diHETE	20	4	2O	2.89	-4	0	-1.31	11.11
NVO 16:4 +3O RT−1.3	16	4	3O	1.3	5,6,15-TriHEPE	20	5	3O	1.72	-4	-1	-1.58	2.88
NVO 16:4 +3O RT−1.6	16	4	3O	1.6	5,6,15-TriHEPE	20	5	3O	1.72	-4	-1	-1.58	3.18
Supplemental Table 4c. Functional group annotations of features annotated as C18 fatty acids and non-volatile oxylipins. The retention times of authentic standards (RT auth) were used to predict retention times for the observed structural isomers. The difference in carbon number and difference in double bond equivalents was calculated for each observed strucutral isomer and the corresponding auth…
Observed					Standard					Calculation				Proposed Functional Group Annotation
Structural Annotation				RT obs	Structural Annotation				RT auth			RT calc	RT obs - RT calc
	#C	#DB	#O		Name	#C	#DB	#O		dC	dDB			Name	Abbrev.
FFA 18:4 RT−1.8	18	4		1.8	AA	20	4		8.1	-2	0	6	-4.2
	18	4		1.8	DHA	22	6		7.7	-4	-2	5.3	-3.5
FFA 18:4 RT−4.8	18	4		4.8	AA	20	4		8.1	-2	0	6	-1.2	Octadecatetraenoic acid (3b)	OTE (3b)
	18	4		4.8	DHA	22	6		7.7	-4	-2	5.3	-0.5
FFA 18:4 RT−5.4	18	4		5.4	AA	20	4		8.1	-2	0	6	-0.6	Octadecatetraenoic acid (3b)	OTE (3b)
	18	4		5.4	DHA	22	6		7.7	-4	-2	5.3	0.1
FFA 18:5 RT−4.2	18	5		4.2	AA	20	4		8.1	-2	1	5.1	-0.9	Octadecapentaenoic acid (3b)	OPE (3b)
	18	5		4.2	DHA	22	6		7.7	-4	-1	4.4	-0.2
NVO 18:0 +3O RT−2.2	18	0	3O	2.2	5,6,15-TriHEPE	20	5	3O	1.72	-2	-5	4.12	-1.92
NVO 18:1 +2O RT−7.2	18	1	2O	7.2	9-HpODE	18	2	2O	5.44	0	-1	6.34	0.86
NVO 18:1 +3O RT−1.9	18	1	3O	1.9	5,6,15-TriHEPE	20	5	3O	1.72	-2	-4	3.22	-1.32
NVO 18:2 +2O RT−5.5	18	2	2O	5.5	9-HpODE	18	2	2O	5.44	0	0	5.44	0.06	Hydroperoxy Octadecadienoic acid (2b)	HpODE (2b)
NVO 18:3 +2O RT−2	18	3	2O	2	9-HpOTrE	18	3	2O	4.28	0	0	4.28	-2.28	dihydroxy Octadecatrienoic acid (3b)	diHOTrE (3b)
					13-HpTrE	18	3	2O	4.65	0	0	4.65	-2.65
					5,6-diHETE	20	4	2O	3.48	-2	-1	2.28	-0.28
					14,15-diHETE	20	4	2O	3	-2	-1	1.8	0.2
					5,12-diHETE	20	4	2O	2.89	-2	-1	1.69	0.31
NVO 18:3 +2O RT−3.4	18	3	2O	3.4	9-HpOTrE	18	3	2O	4.28	0	0	4.28	-0.88
					13-HpTrE	18	3	2O	4.65	0	0	4.65	-1.25
					5,6-diHETE	20	4	2O	3.48	-2	-1	2.28	1.12
					14,15-diHETE	20	4	2O	3	-2	-1	1.8	1.6
					5,12-diHETE	20	4	2O	2.89	-2	-1	1.69	1.71
NVO 18:3 +3O RT−1.8	18	3	3O	1.8	5,6,15-TriHEPE	20	5	3O	1.72	-2	-2	1.42	0.38	Trihydroxy Octadecatrienoic acid (3b)	triHOTrE (3b)
NVO 18:3 +3O RT−3.2	18	3	3O	3.2	5,6,15-TriHEPE	20	5	3O	1.72	-2	-2	1.42	1.78
NVO 18:4 +1O RT−2	18	4	1O	2	9-HOTrE	18	3	1O	4.02	0	1	3.12	-1.12
NVO 18:4 +1O RT−3	18	4	1O	3	9-HOTrE	18	3	1O	4.02	0	1	3.12	-0.12	Hydroxy Octadecatetraenoic acid (3b)	HOTE (3b)
NVO 18:4 +1O RT−3.7	18	4	1O	3.7	9-HOTrE	18	3	1O	4.02	0	1	3.12	0.58
NVO 18:4 +1O RT−4.2	18	4	1O	4.2	9-HOTrE	18	3	1O	4.02	0	1	3.12	1.08
NVO 18:4 +2O RT−1.2	18	4	2O	1.2	9-HpOTrE	18	3	2O	4.28	0	1	3.38	-2.18	Dihydroxy Octadecatetraenoic acid (3b)	diHOTE (3b)
					13-HpTrE	18	3	2O	4.65	0	1	3.75	-3.75
					5,6-diHETE	20	4	2O	3.48	-2	0	1.38	-0.18
					14,15-diHETE	20	4	2O	3	-2	0	0.9	0.3
					5,12-diHETE	20	4	2O	2.89	-2	0	0.79	0.41
NVO 18:4 +2O RT−2.4	18	4	2O	2.4	9-HpOTrE	18	3	2O	4.28	0	1	3.38	-0.98
					13-HpTrE	18	3	2O	4.65	0	1	3.75	-1.35
					5,6-diHETE	20	4	2O	3.48	-2	0	1.38	1.02
					14,15-diHETE	20	4	2O	3	-2	0	0.9	1.5
					5,12-diHETE	20	4	2O	2.89	-2	0	0.79	1.61
NVO 18:4 +3O RT−1.7	18	4	3O	1.7	5,6,15-TriHEPE	20	5	3O	1.72	-2	-1	0.52	1.18
NVO 18:4 +3O RT−2.6	18	4	3O	2.6	5,6,15-TriHEPE	20	5	3O	1.72	-2	-1	0.52	2.08
NVO 18:5 +1O RT−1.3	18	5	1O	1.3	9-HOTrE	18	3	1O	4.02	0	2	2.22	-0.92
NVO 18:5 +1O RT−1.6	18	5	1O	1.6	9-HOTrE	18	3	1O	4.02	0	2	2.22	-0.62
NVO 18:5 +1O RT−2.8	18	5	1O	2.8	9-HOTrE	18	3	1O	4.02	0	2	2.22	0.58
NVO 18:5 +1O RT−3.3	18	5	1O	3.3	9-HOTrE	18	3	1O	4.02	0	2	2.22	1.08
NVO 18:5 +2O RT−1.6	18	5	2O	1.6	9-HpOTrE	18	3	2O	4.28	0	2	2.48	-0.88
					13-HpTrE	18	3	2O	4.65	0	2	2.85	-1.25
					5,6-diHETE	20	4	2O	3.48	-2	1	0.48	1.12
					14,15-diHETE	20	4	2O	3	-2	1	0	1.6
					5,12-diHETE	20	4	2O	2.89	-2	1	-0.11	1.71
NVO 18:5 +2O RT−2.1	18	5	2O	2.1	9-HpOTrE	18	3	2O	4.28	0	2	2.48	-0.38	Hydroperoxy Octadecapentaenoic acid (3b)	HpOPE (3b)
					13-HpTrE	18	3	2O	4.65	0	2	2.85	-0.75
					5,6-diHETE	20	4	2O	3.48	-2	1	0.48	1.62
					14,15-diHETE	20	4	2O	3	-2	1	0	2.1
					5,12-diHETE	20	4	2O	2.89	-2	1	-0.11	2.21
NVO 18:5 +2O RT−3.4	18	5	2O	3.4	9-HpOTrE	18	3	2O	4.28	0	2	2.48	0.92	Hydroperoxy Octadecapentaenoic acid (3b)	HpOPE (3b)
					13-HpTrE	18	3	2O	4.65	0	2	2.85	0.55
					5,6-diHETE	20	4	2O	3.48	-2	1	0.48	2.92
					14,15-diHETE	20	4	2O	3	-2	1	0	3.4
					5,12-diHETE	20	4	2O	2.89	-2	1	-0.11	3.51
NVO 18:5 +3O RT−1.5	18	5	3O	1.5	5,6,15-TriHEPE	20	5	3O	1.72	-2	0	-0.38	1.88
NVO 18:5 +3O RT−2.2	18	5	3O	2.2	5,6,15-TriHEPE	20	5	3O	1.72	-2	0	-0.38	2.58
NVO 18:5 +3O RT−3	18	5	3O	3	5,6,15-TriHEPE	20	5	3O	1.72	-2	0	-0.38	3.38
Supplemental Table 4d. Functional group annotations of features annotated as C20 fatty acids and non-volatile oxylipins. The retention times of authentic standards (RT auth) were used to predict retention times for the observed structural isomers. The difference in carbon number and difference in double bond equivalents was calculated for each observed strucutral isomer and the corresponding auth…
Observed					Standard					Calculation				Proposed Functional Group Annotation
Structural Annotation				RT obs	Structural Annotation				RT auth			RT calc	RT obs - RT calc
	#C	#DB	#O		Name	#C	#DB	#O		dC	dDB			Name	Abbrev.
NVO 20:0 +1O RT−9.3	20	0	1O	9.3	15-HETrE	20	3	1O	6.11	0	-3	8.81	0.49	Hydroxy eicosanoic acid (3b)	HEA (3b)
NVO 20:0 +2O RT−7	20	0	2O	7	5-HpETE	20	4	2O	5.01	0	-4	8.61	-1.61	Dihydroxy eicosanoic acid (3b)	DiHEA (3b)
					12-HpETE	20	4	2O	5.95	0	-4	9.55	-2.55
					15-HpETE	20	4	2O	5.73	0	-4	9.33	-2.33
					5,6-diHETE	20	4	2O	3.48	0	-4	7.08	-0.08
					14,15-diHETE	20	4	2O	3	0	-4	6.6	0.4
					5,12-diHETE	20	4	2O	2.89	0	-4	6.49	0.51
NVO 20:1 +1O RT−8.3	20	1	1O	8.3	15-HETrE	20	3	1O	6.11	0	-2	7.91	0.39	Hydroxy eicosaenoic acid (3b)	HEME (3b)
NVO 20:1 +1O RT−8.6	20	1	1O	8.6	15-HETrE	20	3	1O	6.11	0	-2	7.91	0.69
NVO 20:1 +1O RT−9.2	20	1	1O	9.2	15-HETrE	20	3	1O	6.11	0	-2	7.91	1.29
NVO 20:1 +3O RT−2.7	20	1	3O	2.7	5,6,15-TriHEPE	20	5	3O	1.72	0	-4	5.32	-2.62
NVO 20:2 +1O RT−7.9	20	2	1O	7.9	15-HETrE	20	3	1O	6.11	0	-1	7.01	0.89
NVO 20:2 +1O RT−8.9	20	2	1O	8.9	15-HETrE	20	3	1O	6.11	0	-1	7.01	1.89
NVO 20:2 +1O RT−9.5	20	2	1O	9.5	15-HETrE	20	3	1O	6.11	0	-1	7.01	2.49
NVO 20:2 +3O RT−1.8	20	2	3O	1.8	5,6,15-TriHEPE	20	5	3O	1.72	0	-3	4.42	-2.62
NVO 20:2 +3O RT−2.3	20	2	3O	2.3	5,6,15-TriHEPE	20	5	3O	1.72	0	-3	4.42	-2.12
NVO 20:3 +1O RT−6.98	20	3	1O	6.98	15-HETrE	20	3	1O	6.11	0	0	6.11	0.87
					9-HOTrE	18	3	1O	4.02	2	0	6.12	0.86
					15-HETrE	20	3	1O	6.11	0	0	6.11	0.87
					15-HEPE	20	5	1O	4.6	0	-2	6.4	0.58
					15-KETE	20	5	1O	5.24	0	-2	7.04	-0.06
NVO 20:3 +1O RT−8	20	3	1O	8	15-HETrE	20	3	1O	6.11	0	0	6.11	1.89
					9-HOTrE	18	3	1O	4.02	2	0	6.12	1.88
					15-HETrE	20	3	1O	6.11	0	0	6.11	1.89
					15-HEPE	20	5	1O	4.6	0	-2	6.4	1.6
					15-KETE	20	5	1O	5.24	0	-2	7.04	0.96
NVO 20:3 +2O RT−2.7	20	3	2O	2.7	5-HpETE	20	4	2O	5.01	0	-1	5.91	-3.21
					12-HpETE	20	4	2O	5.95	0	-1	6.85	-4.15
					15-HpETE	20	4	2O	5.73	0	-1	6.63	-3.93
					5,6-diHETE	20	4	2O	3.48	0	-1	4.38	-1.68
					14,15-diHETE	20	4	2O	3	0	-1	3.9	-1.2
					5,12-diHETE	20	4	2O	2.89	0	-1	3.79	-1.09
NVO 20:3 +2O RT−3.8	20	3	2O	3.8	5-HpETE	20	4	2O	5.01	0	-1	5.91	-2.11	Dihydroxy eicosatrienoic acid (3a)	diHETrE (3a)
					12-HpETE	20	4	2O	5.95	0	-1	6.85	-3.05
					15-HpETE	20	4	2O	5.73	0	-1	6.63	-2.83
					5,6-diHETE	20	4	2O	3.48	0	-1	4.38	-0.58
					14,15-diHETE	20	4	2O	3	0	-1	3.9	-0.1
					5,12-diHETE	20	4	2O	2.89	0	-1	3.79	0.01
NVO 20:3 +2O RT−4.4	20	3	2O	4.4	5-HpETE	20	4	2O	5.01	0	-1	5.91	-1.51	Dihydroxy eicosatrienoic acid (3a)	diHETrE (3a)
					12-HpETE	20	4	2O	5.95	0	-1	6.85	-2.45
					15-HpETE	20	4	2O	5.73	0	-1	6.63	-2.23
					5,6-diHETE	20	4	2O	3.48	0	-1	4.38	0.02
					14,15-diHETE	20	4	2O	3	0	-1	3.9	0.5
					5,12-diHETE	20	4	2O	2.89	0	-1	3.79	0.61
NVO 20:3 +2O RT−7.9	20	3	2O	7.9	5-HpETE	20	4	2O	5.01	0	-1	5.91	1.99
					12-HpETE	20	4	2O	5.95	0	-1	6.85	1.05
					15-HpETE	20	4	2O	5.73	0	-1	6.63	1.27
					5,6-diHETE	20	4	2O	3.48	0	-1	4.38	3.52
					14,15-diHETE	20	4	2O	3	0	-1	3.9	4
					5,12-diHETE	20	4	2O	2.89	0	-1	3.79	4.11
NVO 20:3 +3O RT−2	20	3	3O	2	5,6,15-TriHEPE	20	5	3O	1.72	0	-2	3.52	-1.52
NVO 20:3 +3O RT−3.3	20	3	3O	3.3	5,6,15-TriHEPE	20	5	3O	1.72	0	-2	3.52	-0.22	Trihydroxy eicosatrienoic acid (3b)	triHETrE (3b)
NVO 20:3 +3O RT−4	20	3	3O	4	5,6,15-TriHEPE	20	5	3O	1.72	0	-2	3.52	0.48	Trihydroxy eicosatrienoic acid (3b)	triHETrE (3b)
NVO 20:3 +3O RT−5.1	20	3	3O	5.1	5,6,15-TriHEPE	20	5	3O	1.72	0	-2	3.52	1.58
NVO 20:4 +1O RT−2.7	20	4	1O	2.7	15-HETE	20	4	1O	5.43	0	0	5.43	-2.73
NVO 20:4 +1O RT−3.2	20	4	1O	3.2	15-HETE	20	4	1O	5.43	0	0	5.43	-2.23
NVO 20:4 +1O RT−4.4	20	4	1O	4.4	15-HETE	20	4	1O	5.43	0	0	5.43	-1.03
					9-HOTrE	18	3	1O	4.02	2	1	5.22	-0.82
					15-HETrE	20	3	1O	6.11	0	1	5.21	-0.81
					15-HEPE	20	5	1O	4.6	0	-1	5.5	-1.1
					15-KETE	20	5	1O	5.24	0	-1	6.14	-1.74
NVO 20:4 +1O RT−5.95	20	4	1O	5.95	15-HETE	20	4	1O	5.43	0	0	5.43	0.52
					9-HOTrE	18	3	1O	4.02	2	1	5.22	0.73
					15-HETrE	20	3	1O	6.11	0	1	5.21	0.74
					15-HEPE	20	5	1O	4.6	0	-1	5.5	0.45
					15-KETE	20	5	1O	5.24	0	-1	6.14	-0.19
NVO 20:4 +2O RT−2.3	20	4	2O	2.3	5-HpETE	20	4	2O	5.01	0	0	5.01	-2.71
					12-HpETE	20	4	2O	5.95	0	0	5.95	-3.65
					15-HpETE	20	4	2O	5.73	0	0	5.73	-3.43
					5,6-diHETE	20	4	2O	3.48	0	0	3.48	-1.18
					14,15-diHETE	20	4	2O	3	0	0	3	-0.7
					5,12-diHETE	20	4	2O	2.89	0	0	2.89	-0.59
NVO 20:4 +2O RT−3.8	20	4	2O	3.8	5-HpETE	20	4	2O	5.01	0	0	5.01	-1.21	Dihydroxy eicosatetraenoic acid (2b)	diHETE (2b)
					12-HpETE	20	4	2O	5.95	0	0	5.95	-2.15
					15-HpETE	20	4	2O	5.73	0	0	5.73	-1.93
					5,6-diHETE	20	4	2O	3.48	0	0	3.48	0.32
					14,15-diHETE	20	4	2O	3	0	0	3	0.8
					5,12-diHETE	20	4	2O	2.89	0	0	2.89	0.91
NVO 20:4 +2O RT−4	20	4	2O	4	5-HpETE	20	4	2O	5.01	0	0	5.01	-1.01	Dihydroxy eicosatetraenoic acid (2b)	diHETE (2b)
					12-HpETE	20	4	2O	5.95	0	0	5.95	-1.95
					15-HpETE	20	4	2O	5.73	0	0	5.73	-1.73
					5,6-diHETE	20	4	2O	3.48	0	0	3.48	0.52
					14,15-diHETE	20	4	2O	3	0	0	3	1
					5,12-diHETE	20	4	2O	2.89	0	0	2.89	1.11
NVO 20:4 +2O RT−7	20	4	2O	7	5-HpETE	20	4	2O	5.01	0	0	5.01	1.99
					12-HpETE	20	4	2O	5.95	0	0	5.95	1.05
					15-HpETE	20	4	2O	5.73	0	0	5.73	1.27
					5,6-diHETE	20	4	2O	3.48	0	0	3.48	3.52
					14,15-diHETE	20	4	2O	3	0	0	3	4
					5,12-diHETE	20	4	2O	2.89	0	0	2.89	4.11
NVO 20:4 +3O RT−1.9	20	4	3O	1.9	5,6,15-TriHEPE	20	5	3O	1.72	0	-1	2.62	-0.72
NVO 20:4 +3O RT−3.4	20	4	3O	3.4	5,6,15-TriHEPE	20	5	3O	1.72	0	-1	2.62	0.78
NVO 20:5 +1O RT−4.9	20	5	1O	4.9	15-HEPE	20	5	1O	4.56	0	0	4.56	0.34
					9-HOTrE	18	3	1O	4.02	2	2	4.32	0.58
					15-HETrE	20	3	1O	6.11	0	2	4.31	0.59
					15-HETE	20	4	1O	5.43	0	1	4.53	0.37
					15-KETE	20	5	1O	5.24	0	0	5.24	-0.34
NVO 20:5 +1O RT−4	20	5	1O	4	15-HEPE	20	5	1O	4.56	0	0	4.56	-0.56
					9-HOTrE	18	3	1O	4.02	2	2	4.32	-0.32
					15-HETrE	20	3	1O	6.11	0	2	4.31	-0.31
					15-HETE	20	4	1O	5.43	0	1	4.53	-0.53
					15-KETE	20	5	1O	5.24	0	0	5.24	-1.24
NVO 20:5 +1O RT−5.6	20	5	1O	5.6	15-HEPE	20	5	1O	4.56	0	0	4.56	1.04
					9-HOTrE	18	3	1O	4.02	2	2	4.32	1.28
					15-HETrE	20	3	1O	6.11	0	2	4.31	1.29
					15-HETE	20	4	1O	5.43	0	1	4.53	1.07
					15-KETE	20	5	1O	5.24	0	0	5.24	0.36
NVO 20:5 +2O RT−1.2	20	5	2O	1.2	5-HpETE	20	4	2O	5.01	0	1	4.11	-2.91
					12-HpETE	20	4	2O	5.95	0	1	5.05	-3.85
					15-HpETE	20	4	2O	5.73	0	1	4.83	-3.63
					5,6-diHETE	20	4	2O	3.48	0	1	2.58	-1.38
					14,15-diHETE	20	4	2O	3	0	1	2.1	-0.9
					5,12-diHETE	20	4	2O	2.89	0	1	1.99	-0.79
NVO 20:5 +2O RT−2.2	20	5	2O	2.2	5-HpETE	20	4	2O	5.01	0	1	4.11	-1.91	Dihydroxy eicosapentaenoic acid (3b)	diHEPE (3b)
					12-HpETE	20	4	2O	5.95	0	1	5.05	-2.85
					15-HpETE	20	4	2O	5.73	0	1	4.83	-2.63
					5,6-diHETE	20	4	2O	3.48	0	1	2.58	-0.38
					14,15-diHETE	20	4	2O	3	0	1	2.1	0.1
					5,12-diHETE	20	4	2O	2.89	0	1	1.99	0.21
NVO 20:5 +2O RT−2.7	20	5	2O	2.7	5-HpETE	20	4	2O	5.01	0	1	4.11	-1.41	Dihydroxy eicosapentaenoic acid (3b)	diHEPE (3b)
					12-HpETE	20	4	2O	5.95	0	1	5.05	-2.35
					15-HpETE	20	4	2O	5.73	0	1	4.83	-2.13
					5,6-diHETE	20	4	2O	3.48	0	1	2.58	0.12
					14,15-diHETE	20	4	2O	3	0	1	2.1	0.6
					5,12-diHETE	20	4	2O	2.89	0	1	1.99	0.71
NVO 20:5 +2O RT−3.1	20	5	2O	3.1	5-HpETE	20	4	2O	5.01	0	1	4.11	-1.01	Dihydroxy eicosapentaenoic acid (3b)	diHEPE (3b)
					12-HpETE	20	4	2O	5.95	0	1	5.05	-1.95
					15-HpETE	20	4	2O	5.73	0	1	4.83	-1.73
					5,6-diHETE	20	4	2O	3.48	0	1	2.58	0.52
					14,15-diHETE	20	4	2O	3	0	1	2.1	1
					5,12-diHETE	20	4	2O	2.89	0	1	1.99	1.11
NVO 20:5 +2O RT−4.1	20	5	2O	4.1	5-HpETE	20	4	2O	5.01	0	1	4.11	-0.01	Hydroperoxy eicosapentaenoic acid (3a)	HpEPE (3a)
					12-HpETE	20	4	2O	5.95	0	1	5.05	-0.95
					15-HpETE	20	4	2O	5.73	0	1	4.83	-0.73
					5,6-diHETE	20	4	2O	3.48	0	1	2.58	1.52
					14,15-diHETE	20	4	2O	3	0	1	2.1	2
					5,12-diHETE	20	4	2O	2.89	0	1	1.99	2.11
NVO 20:5 +2O RT−4.9	20	5	2O	4.9	5-HpETE	20	4	2O	5.01	0	1	4.11	0.79	Hydroperoxy eicosapentaenoic acid (3b)	HpEPE (3b)
					12-HpETE	20	4	2O	5.95	0	1	5.05	-0.15
					15-HpETE	20	4	2O	5.73	0	1	4.83	0.07
					5,6-diHETE	20	4	2O	3.48	0	1	2.58	2.32
					14,15-diHETE	20	4	2O	3	0	1	2.1	2.8
					5,12-diHETE	20	4	2O	2.89	0	1	1.99	2.91
	20	5	2O	5.27	5-HpETE	20	4	2O	5.01	0	1	4.11	1.16
					12-HpETE	20	4	2O	5.95	0	1	5.05	0.22
					15-HpETE	20	4	2O	5.73	0	1	4.83	0.44
					5,6-diHETE	20	4	2O	3.48	0	1	2.58	2.69
					14,15-diHETE	20	4	2O	3	0	1	2.1	3.17
					5,12-diHETE	20	4	2O	2.89	0	1	1.99	3.28
NVO 20:5 +3O RT−1.9	20	5	3O	1.9	5,6,15-TriHEPE	20	5	3O	1.72	0	0	1.72	0.18	Trihydroxy eicosapentaenoic acid (2b)	triHEPE (2b)
NVO 20:5 +3O RT−2.4	20	5	3O	2.4	5,6,15-TriHEPE	20	5	3O	1.72	0	0	1.72	0.68
Supplemental Table 4e. Functional group annotations of features annotated as long-chain (C22 >) fatty acids and non-volatile oxylipins. The retention times of authentic standards (RT auth) were used to predict retention times for the observed structural isomers. The difference in carbon number and difference in double bond equivalents was calculated for each observed strucutral isomer and the cor…
Observed					Standard					Calculation				Proposed Functional Group Annotation
Structural Annotation				RT obs	Structural Annotation				RT auth			RT calc	RT obs - RT calc
	#C	#DB	#O		Name	#C	#DB	#O		dC	dDB			Name	Abbrev.
FFA 24:1 RT−14.6	24	1		14.6	DHA	22	6		7.71	2	-5	14.31	0.29	Tetracosenoic acid (3b)	TME (3b)
NVO 22:0 +1O RT−10.2	22	0	1O	10.2	15-HEPE	20	5	1O	4.56	2	-5	11.16	-0.96
NVO 22:0 +2O RT−10.5	22	0	2O	10.5	5-HpETE	20	4	2O	5.01	2	-4	10.71	-0.21	Hydroperoxy Docosanoic acid (3b)	HpDoA (3b)
					12-HpETE	20	4	2O	5.95	2	-4	11.65	-1.15
					15-HpETE	20	4	2O	5.73	2	-4	11.43	-0.93
					5,6-diHETE	20	4	2O	3.48	2	-4	9.18	1.32
					14,15-diHETE	20	4	2O	3	2	-4	8.7	1.8
					5,12-diHETE	20	4	2O	2.89	2	-4	8.59	1.91
NVO 22:1 +1O RT−8.9	22	1	1O	8.9	15-HEPE	20	5	1O	4.56	2	-4	10.26	-1.36
NVO 22:2 +2O RT−7.8	22	2	2O	7.8	5-HpETE	20	4	2O	5.01	2	-2	8.91	-1.11	Dihydroxy Docosadienoic acid (3b)	diHDoDE (3b)
					12-HpETE	20	4	2O	5.95	2	-2	9.85	-2.05
					15-HpETE	20	4	2O	5.73	2	-2	9.63	-1.83
					5,6-diHETE	20	4	2O	3.48	2	-2	7.38	0.42
					14,15-diHETE	20	4	2O	3	2	-2	6.9	0.9
					5,12-diHETE	20	4	2O	2.89	2	-2	6.79	1.01
NVO 22:2 +3O RT−8	22	2	3O	8	5,6,15-TriHEPE	20	5	3O	1.72	2	-3	6.52	1.48
NVO 22:4 +3O RT−1.9	22	4	3O	1.9	5,6,15-TriHEPE	20	5	3O	1.72	2	-1	4.72	-2.82
NVO 22:4 +3O RT−2.5	22	4	3O	2.5	5,6,15-TriHEPE	20	5	3O	1.72	2	-1	4.72	-2.22
NVO 22:5 +2O RT−2.9	22	5	2O	2.9	5-HpETE	20	4	2O	5.01	2	1	6.21	-3.31
					12-HpETE	20	4	2O	5.95	2	1	7.15	-4.25
					15-HpETE	20	4	2O	5.73	2	1	6.93	-4.03
					5,6-diHETE	20	4	2O	3.48	2	1	4.68	-1.78
					14,15-diHETE	20	4	2O	3	2	1	4.2	-1.3
					5,12-diHETE	20	4	2O	2.89	2	1	4.09	-1.19
NVO 22:5 +2O RT−4.1	22	5	2O	4.1	5-HpETE	20	4	2O	5.01	2	1	6.21	-2.11	Dihydroxy Docosapentaenoic acid (3b)	diHDoPE (3b)
					12-HpETE	20	4	2O	5.95	2	1	7.15	-3.05
					15-HpETE	20	4	2O	5.73	2	1	6.93	-2.83
					5,6-diHETE	20	4	2O	3.48	2	1	4.68	-0.58
					14,15-diHETE	20	4	2O	3	2	1	4.2	-0.1
					5,12-diHETE	20	4	2O	2.89	2	1	4.09	0.01
NVO 22:5 +2O RT−8.4	22	5	2O	8.4	5-HpETE	20	4	2O	5.01	2	1	6.21	2.19
					12-HpETE	20	4	2O	5.95	2	1	7.15	1.25
					15-HpETE	20	4	2O	5.73	2	1	6.93	1.47
					5,6-diHETE	20	4	2O	3.48	2	1	4.68	3.72
					14,15-diHETE	20	4	2O	3	2	1	4.2	4.2
					5,12-diHETE	20	4	2O	2.89	2	1	4.09	4.31
NVO 22:5 +3O RT−2.2	22	5	3O	2.2	5,6,15-TriHEPE	20	5	3O	1.72	2	0	3.82	-1.62
NVO 22:5 +3O RT−2.9	22	5	3O	2.9	5,6,15-TriHEPE	20	5	3O	1.72	2	0	3.82	-0.92
NVO 22:6 +1O RT−5.6	22	6	1O	5.6	15-HEPE	20	5	1O	4.56	2	1	5.76	-0.16	Hydroxy Docosahexaenoic acid (3b)	HDoHE (3b)
NVO 22:6 +2O RT−1.7	22	6	2O	1.7	5-HpETE	20	4	2O	5.01	2	2	5.31	-3.61
					12-HpETE	20	4	2O	5.95	2	2	6.25	-4.55
					15-HpETE	20	4	2O	5.73	2	2	6.03	-4.33
					5,6-diHETE	20	4	2O	3.48	2	2	3.78	-2.08
					14,15-diHETE	20	4	2O	3	2	2	3.3	-1.6
					5,12-diHETE	20	4	2O	2.89	2	2	3.19	-1.49
NVO 22:6 +2O RT−2.6	22	6	2O	2.6	5-HpETE	20	4	2O	5.01	2	2	5.31	-2.71
					12-HpETE	20	4	2O	5.95	2	2	6.25	-3.65
					15-HpETE	20	4	2O	5.73	2	2	6.03	-3.43
					5,6-diHETE	20	4	2O	3.48	2	2	3.78	-1.18
					14,15-diHETE	20	4	2O	3	2	2	3.3	-0.7
					5,12-diHETE	20	4	2O	2.89	2	2	3.19	-0.59
NVO 22:6 +2O RT−2.9	22	6	2O	2.9	5-HpETE	20	4	2O	5.01	2	2	5.31	-2.41	Dihydroxy Docosahexaenoic acid (3b)	diHDoHE (3b)
					12-HpETE	20	4	2O	5.95	2	2	6.25	-3.35
					15-HpETE	20	4	2O	5.73	2	2	6.03	-3.13
					5,6-diHETE	20	4	2O	3.48	2	2	3.78	-0.88
					14,15-diHETE	20	4	2O	3	2	2	3.3	-0.4
					5,12-diHETE	20	4	2O	2.89	2	2	3.19	-0.29
NVO 22:6 +2O RT−3.8	22	6	2O	3.8	5-HpETE	20	4	2O	5.01	2	2	5.31	-1.51	Dihydroxy Docosahexaenoic acid (3a)	diHDoHE (3a)
					12-HpETE	20	4	2O	5.95	2	2	6.25	-2.45
					15-HpETE	20	4	2O	5.73	2	2	6.03	-2.23
					5,6-diHETE	20	4	2O	3.48	2	2	3.78	0.02
					14,15-diHETE	20	4	2O	3	2	2	3.3	0.5
					5,12-diHETE	20	4	2O	2.89	2	2	3.19	0.61
NVO 22:6 +2O RT−6.1	22	6	2O	6.1	5-HpETE	20	4	2O	5.01	2	2	5.31	0.79	Hydroperoxy Docosahexaenoic acid (3b)	HpHDoHE (3b)
					12-HpETE	20	4	2O	5.95	2	2	6.25	-0.15
					15-HpETE	20	4	2O	5.73	2	2	6.03	0.07
					5,6-diHETE	20	4	2O	3.48	2	2	3.78	2.32
					14,15-diHETE	20	4	2O	3	2	2	3.3	2.8
					5,12-diHETE	20	4	2O	2.89	2	2	3.19	2.91
NVO 22:6 +3O RT−1.8	22	6	3O	1.8	5,6,15-TriHEPE	20	5	3O	1.72	2	1	2.92	-1.12
NVO 22:6 +3O RT−3.2	22	6	3O	3.2	5,6,15-TriHEPE	20	5	3O	1.72	2	1	2.92	0.28	Trihydroxy Docosahexaenoic acid (3b)	triHDoHE (3b)
NVO 24:2 +2O RT−11.6	24	2	2O	11.6	5-HpETE	20	4	2O	5.01	4	-2	11.01	0.59	Hydroperoxy Tetracosadienoic acid (3b)	HpToDE (3b)
					12-HpETE	20	4	2O	5.95	4	-2	11.95	-0.35
					15-HpETE	20	4	2O	5.73	4	-2	11.73	-0.13
					5,6-diHETE	20	4	2O	3.48	4	-2	9.48	2.12
					14,15-diHETE	20	4	2O	3	4	-2	9	2.6
					5,12-diHETE	20	4	2O	2.89	4	-2	8.89	2.71
Supplemental Table 4f. Elemental formulas of features annotated as PUAs. The retention times of authentic standards (RT auth) were used to predict retention times for the observed structural isomers. The difference in carbon number and difference in double bond equivalents was calculated for each observed strucutral isomer and the corresponding authentic standard. Equation (1) was applied to dete…
Observed					Standard					Calculation				Elemental Formula
Structural Annotation				RT obs	Structural Annotation				RT auth			RT calc	RT obs - RT calc
	#C	#DB	#O		Name	#C	#DB	#O		dC	dDB
PUA 10:1 RT−1.7	10	1		1.7	DD	10	2		3.65	0	-1	4.55	-2.85	C10H18O
PUA 10:3 RT−1.3	10	3		1.3	DD	10	2		3.65	0	1	2.75	-1.45	C10H14O
PUA 10:3 RT−1.6	10	3		1.6	DD	10	2		3.65	0	1	2.75	-1.15	C10H14O
PUA 10:3 RT−2.6	10	3		2.6	DD	10	2		3.65	0	1	2.75	-0.15	Decatrienal (3b)
PUA 12:2 RT−1.6	12	2		1.6	DD	10	2		3.65	2	0	5.75	-4.15	C12H20O
PUA 12:2 RT−2	12	2		2	DD	10	2		3.65	2	0	5.75	-3.75	C12H20O
PUA 12:2 RT−2.6	12	2		2.6	DD	10	2		3.65	2	0	5.75	-3.15	C12H20O
PUA 12:3 RT−1.4	12	3		1.4	DD	10	2		3.65	2	1	4.85	-3.45	C12H18O
PUA 12:3 RT−2.6	12	3		2.6	DD	10	2		3.65	2	1	4.85	-2.25	C12H18O
PUA 12:5 RT−1.5	12	5		1.5	DD	10	2		3.65	2	3	3.05	-1.55	C12H14O
PUA 12:5 +4O RT	1.3		C12H14O5		C12H14O5 RT-1.3
PUA 6:1 +3O RT	1.3		C6H10O4		C6H10O4 RT-1.3
PUA 6:1 +3O RT	1.7		C6H10O4		C6H10O4 RT-1.7
PUA 6:1 +3O RT	2.8		C6H10O4		C6H10O4 RT-2.8
PUA 6:1 +4O RT	2		C6H10O5		C6H10O5 RT-2
PUA 8:0 +2O RT	1.6		C8H16O3		C8H16O3 RT-1.6
PUA 8:1 +1O RT	2.2		C8H14O2		C8H14O2 RT-2.2
PUA 8:1 +4O RT	1.8		C8H14O5		C8H14O5 RT-1.8
PUA 8:2 +1O RT	1.5		C8H12O2		C8H12O2 RT-1.5
PUA 8:2 +1O RT	2.6		C8H12O2		C8H12O2 RT-2.6
PUA 8:2 +3O RT	1.3		C8H12O4		C8H12O4 RT-1.3
PUA 8:3 +2O RT	1.4		C8H10O3		C8H10O3 RT-1.4
