# Supplementary material for: Viral Infection Leads to a Unique Suite of Allelopathic Chemical Signals in Three Diatom Host–Virus Pairs
Source: Mar Drugs. 2024 May 17;22(5):228. doi: 10.3390/md22050228 (PMC11123003; doi:10.3390/md22050228)
Supplement: Supplementary file 1 [file marinedrugs-22-00228-s001.zip › Supplemental Table S5 TIC ANOVA.xlsx]

## Sheet: Sheet1
Table S5. ANOVA results for cell normalized total oxylipidome peak area between treatments
comparison	diff	lwr	upr	p adj	<0.01	<0.05
b_Exp1-a_Exp0	-0.537313	-1.84539	0.77076	0.970927
c_Early_Stat-a_Exp0	0.792748	-0.515326	2.10082	0.660662
c_Early_Stat-b_Exp1	1.33006	0.0219871	2.63813	0.0431367
d_Stationary-a_Exp0	0.325096	-0.982978	1.63317	0.999836
d_Stationary-b_Exp1	0.862409	-0.445665	2.17048	0.531078
d_Stationary-c_Early_Stat	-0.467652	-1.77573	0.840422	0.991564
e_Decline-a_Exp0	0.519614	-0.78846	1.82769	0.978085
e_Decline-b_Exp1	1.05693	-0.251147	2.365	0.225925
e_Decline-c_Early_Stat	-0.273134	-1.58121	1.03494	0.999981
e_Decline-d_Stationary	0.194518	-1.11356	1.50259	1
f_Early_Vir-a_Exp0	0.423674	-0.8844	1.73175	0.996829
f_Early_Vir-b_Exp1	0.960987	-0.347086	2.26906	0.359088
f_Early_Vir-c_Early_Stat	-0.369074	-1.67715	0.939	0.999283
f_Early_Vir-d_Stationary	0.0985783	-1.2095	1.40665	1
f_Early_Vir-e_Decline	-0.09594	-1.40401	1.21213	1
g_Mid_Vir-a_Exp0	1.44518	0.137103	2.75325	0.0193227		x
g_Mid_Vir-b_Exp1	1.98249	0.674417	3.29056	0.0003105	x	x
g_Mid_Vir-c_Early_Stat	0.65243	-0.655644	1.9605	0.879375
g_Mid_Vir-d_Stationary	1.12008	-0.187992	2.42816	0.160273
g_Mid_Vir-e_Decline	0.925563	-0.382511	2.23364	0.417697
g_Mid_Vir-f_Early_Vir	1.0215	-0.286571	2.32958	0.270418
h_Late_Vir-a_Exp0	1.83987	0.531795	3.14794	0.000962	x	x
h_Late_Vir-b_Exp1	2.37718	1.06911	3.68526	1.34e-05	x	x
h_Late_Vir-c_Early_Stat	1.04712	-0.260953	2.3552	0.237681
h_Late_Vir-d_Stationary	1.51477	0.206699	2.82285	0.0116484		x
h_Late_Vir-e_Decline	1.32025	0.0121809	2.62833	0.0460845		x
h_Late_Vir-f_Early_Vir	1.41619	0.108121	2.72427	0.0237555		x
h_Late_Vir-g_Mid_Vir	0.394692	-0.913382	1.70277	0.998498
i_Early_Vir-a_Exp0	0.684089	-0.623984	1.99216	0.839005
i_Early_Vir-b_Exp1	1.2214	-0.086671	2.52948	0.0875831
i_Early_Vir-c_Early_Stat	-0.108658	-1.41673	1.19942	1
i_Early_Vir-d_Stationary	0.358994	-0.94908	1.66707	0.999476
i_Early_Vir-e_Decline	0.164475	-1.1436	1.47255	1
i_Early_Vir-f_Early_Vir	0.260415	-1.04766	1.56849	0.99999
i_Early_Vir-g_Mid_Vir	-0.761088	-2.06916	0.546986	0.717423
i_Early_Vir-h_Late_Vir	-1.15578	-2.46385	0.152295	0.130448
j_Late_Vir-a_Exp0	1.5099	0.201824	2.81797	0.012074		x
j_Late_Vir-b_Exp1	2.04721	0.739137	3.35529	0.0001854	x	x
j_Late_Vir-c_Early_Stat	0.71715	-0.590924	2.02522	0.790388
j_Late_Vir-d_Stationary	1.1848	-0.123272	2.49288	0.109707
j_Late_Vir-e_Decline	0.990284	-0.31779	2.29836	0.31423
j_Late_Vir-f_Early_Vir	1.08622	-0.22185	2.3943	0.193335
j_Late_Vir-g_Mid_Vir	0.0647207	-1.24335	1.37279	1
j_Late_Vir-h_Late_Vir	-0.329971	-1.63804	0.978103	0.999804
j_Late_Vir-i_Early_Vir	0.825808	-0.482266	2.13388	0.599379
k_Exp0-a_Exp0	0.757591	-0.550483	2.06567	0.723513
k_Exp0-b_Exp1	1.2949	-0.0131691	2.60298	0.0545688
k_Exp0-c_Early_Stat	-0.0351562	-1.34323	1.27292	1
k_Exp0-d_Stationary	0.432496	-0.875578	1.74057	0.996087
k_Exp0-e_Decline	0.237977	-1.0701	1.54605	0.999997
k_Exp0-f_Early_Vir	0.333917	-0.974157	1.64199	0.999774
k_Exp0-g_Mid_Vir	-0.687586	-1.99566	0.620488	0.834161
k_Exp0-h_Late_Vir	-1.08228	-2.39035	0.225796	0.197506
k_Exp0-i_Early_Vir	0.0735019	-1.23457	1.38158	1
k_Exp0-j_Late_Vir	-0.752306	-2.06038	0.555767	0.732635
l_Exp1-a_Exp0	0.412765	-0.895309	1.72084	0.997582
l_Exp1-b_Exp1	0.950079	-0.357995	2.25815	0.376658
l_Exp1-c_Early_Stat	-0.379982	-1.68806	0.928092	0.999008
l_Exp1-d_Stationary	0.0876695	-1.2204	1.39574	1
l_Exp1-e_Decline	-0.106849	-1.41492	1.20123	1
l_Exp1-f_Early_Vir	-0.0109088	-1.31898	1.29717	1
l_Exp1-g_Mid_Vir	-1.03241	-2.34049	0.275662	0.25612
l_Exp1-h_Late_Vir	-1.4271	-2.73518	-0.11903	0.0219857		x
l_Exp1-i_Early_Vir	-0.271324	-1.5794	1.03675	0.999983
l_Exp1-j_Late_Vir	-1.09713	-2.40521	0.210941	0.182154
l_Exp1-k_Exp0	-0.344826	-1.6529	0.963248	0.999671
m_Early_Stat-a_Exp0	1.74357	0.4355	3.05165	0.0020462	x	x
m_Early_Stat-b_Exp1	2.28089	0.972813	3.58896	2.88e-05	x	x
m_Early_Stat-c_Early_Stat	0.950826	-0.357248	2.2589	0.37544
m_Early_Stat-d_Stationary	1.41848	0.110404	2.72655	0.0233744		x
m_Early_Stat-e_Decline	1.22396	-0.0841141	2.53203	0.0861924
m_Early_Stat-f_Early_Vir	1.3199	0.0118258	2.62797	0.0461946		x
m_Early_Stat-g_Mid_Vir	0.298397	-1.00968	1.60647	0.999942
m_Early_Stat-h_Late_Vir	-0.0962951	-1.40437	1.21178	1
m_Early_Stat-i_Early_Vir	1.05948	-0.24859	2.36756	0.22293
m_Early_Stat-j_Late_Vir	0.233676	-1.0744	1.54175	0.999997
m_Early_Stat-k_Exp0	0.985982	-0.322092	2.29406	0.320595
m_Early_Stat-l_Exp1	1.33081	0.0227347	2.63888	0.0429192		x
n_Decline-a_Exp0	0.490766	-0.817308	1.79884	0.986781
n_Decline-b_Exp1	1.02808	-0.279995	2.33615	0.261736
n_Decline-c_Early_Stat	-0.301982	-1.61006	1.00609	0.999933
n_Decline-d_Stationary	0.16567	-1.1424	1.47374	1
n_Decline-e_Decline	-0.028848	-1.33692	1.27923	1
n_Decline-f_Early_Vir	0.067092	-1.24098	1.37517	1
n_Decline-g_Mid_Vir	-0.954411	-2.26249	0.353663	0.369626
n_Decline-h_Late_Vir	-1.3491	-2.65718	-0.0410289	0.0378979		x
n_Decline-i_Early_Vir	-0.193323	-1.5014	1.11475	1
n_Decline-j_Late_Vir	-1.01913	-2.32721	0.288942	0.273596
n_Decline-k_Exp0	-0.266825	-1.5749	1.04125	0.999986
n_Decline-l_Exp1	0.0780008	-1.23007	1.38607	1
n_Decline-m_Early_Stat	-1.25281	-2.56088	0.0552661	0.0717843
o_Early_Vir-a_Exp0	1.84089	0.532819	3.14897	0.0009543	x	x
o_Early_Vir-b_Exp1	2.37821	1.07013	3.68628	1.33e-05	x	x
o_Early_Vir-c_Early_Stat	1.04815	-0.259928	2.35622	0.236433
o_Early_Vir-d_Stationary	1.5158	0.207723	2.82387	0.0115608		x
o_Early_Vir-e_Decline	1.32128	0.0132051	2.62935	0.0457683		x
o_Early_Vir-f_Early_Vir	1.41722	0.109145	2.72529	0.0235838		x
o_Early_Vir-g_Mid_Vir	0.395716	-0.912358	1.70379	0.998456
o_Early_Vir-h_Late_Vir	0.00102418	-1.30705	1.3091	1
o_Early_Vir-i_Early_Vir	1.1568	-0.15127	2.46488	0.129665
o_Early_Vir-j_Late_Vir	0.330995	-0.977079	1.63907	0.999796
o_Early_Vir-k_Exp0	1.0833	-0.224772	2.39138	0.196417
o_Early_Vir-l_Exp1	1.42813	0.120054	2.7362	0.021826		x
o_Early_Vir-m_Early_Stat	0.0973192	-1.21075	1.40539	1
o_Early_Vir-n_Decline	1.35013	0.0420531	2.6582	0.0376334		x
p_Late_Vir-a_Exp0	2.16433	0.856255	3.4724	7.28e-05	x	x
p_Late_Vir-b_Exp1	2.70164	1.39357	4.00972	1.1e-06	x	x
p_Late_Vir-c_Early_Stat	1.37158	0.0635073	2.67966	0.0324672		x
p_Late_Vir-d_Stationary	1.83923	0.531159	3.14731	0.0009669	x	x
p_Late_Vir-e_Decline	1.64471	0.336641	2.95279	0.0043884	x	x
p_Late_Vir-f_Early_Vir	1.74065	0.432581	3.04873	0.0020933	x	x
p_Late_Vir-g_Mid_Vir	0.719152	-0.588922	2.02723	0.787254
p_Late_Vir-h_Late_Vir	0.32446	-0.983614	1.63253	0.999839
p_Late_Vir-i_Early_Vir	1.48024	0.172165	2.78831	0.0149992		x
p_Late_Vir-j_Late_Vir	0.654431	-0.653643	1.9625	0.877015
p_Late_Vir-k_Exp0	1.40674	0.0986634	2.71481	0.0253967		x
p_Late_Vir-l_Exp1	1.75156	0.44349	3.05964	0.0019228	x	x
p_Late_Vir-m_Early_Stat	0.420755	-0.887319	1.72883	0.997048
p_Late_Vir-n_Decline	1.67356	0.365489	2.98164	0.0035178	x	x
p_Late_Vir-o_Early_Vir	0.323436	-0.984638	1.63151	0.999846

## Sheet: Sheet3
	diff	lwr	upr	p adj	0.01	0.05
g_Mid_Vir-a_Exp0	1.44518	0.137103	2.75325	0.0193227		x
g_Mid_Vir-b_Exp1	1.98249	0.674417	3.29056	0.0003105	x	x
h_Late_Vir-a_Exp0	1.83987	0.531795	3.14794	0.000962	x	x
h_Late_Vir-b_Exp1	2.37718	1.06911	3.68526	1.34e-05	x	x
h_Late_Vir-d_Stationary	1.51477	0.206699	2.82285	0.0116484		x
h_Late_Vir-e_Decline	1.32025	0.0121809	2.62833	0.0460845		x
h_Late_Vir-f_Early_Vir	1.41619	0.108121	2.72427	0.0237555		x
j_Late_Vir-a_Exp0	1.5099	0.201824	2.81797	0.012074		x
j_Late_Vir-b_Exp1	2.04721	0.739137	3.35529	0.0001854	x	x
l_Exp1-h_Late_Vir	-1.4271	-2.73518	-0.11903	0.0219857		x
m_Early_Stat-a_Exp0	1.74357	0.4355	3.05165	0.0020462	x	x
m_Early_Stat-b_Exp1	2.28089	0.972813	3.58896	2.88e-05	x	x
m_Early_Stat-d_Stationary	1.41848	0.110404	2.72655	0.0233744		x
m_Early_Stat-f_Early_Vir	1.3199	0.0118258	2.62797	0.0461946		x
m_Early_Stat-l_Exp1	1.33081	0.0227347	2.63888	0.0429192		x
n_Decline-h_Late_Vir	-1.3491	-2.65718	-0.0410289	0.0378979		x
o_Early_Vir-a_Exp0	1.84089	0.532819	3.14897	0.0009543	x	x
o_Early_Vir-b_Exp1	2.37821	1.07013	3.68628	1.33e-05	x	x
o_Early_Vir-d_Stationary	1.5158	0.207723	2.82387	0.0115608		x
o_Early_Vir-e_Decline	1.32128	0.0132051	2.62935	0.0457683		x
o_Early_Vir-f_Early_Vir	1.41722	0.109145	2.72529	0.0235838		x
o_Early_Vir-l_Exp1	1.42813	0.120054	2.7362	0.021826		x
o_Early_Vir-n_Decline	1.35013	0.0420531	2.6582	0.0376334		x
p_Late_Vir-a_Exp0	2.16433	0.856255	3.4724	7.28e-05	x	x
p_Late_Vir-b_Exp1	2.70164	1.39357	4.00972	1.1e-06	x	x
p_Late_Vir-c_Early_Stat	1.37158	0.0635073	2.67966	0.0324672		x
p_Late_Vir-d_Stationary	1.83923	0.531159	3.14731	0.0009669	x	x
p_Late_Vir-e_Decline	1.64471	0.336641	2.95279	0.0043884	x	x
p_Late_Vir-f_Early_Vir	1.74065	0.432581	3.04873	0.0020933	x	x
p_Late_Vir-i_Early_Vir	1.48024	0.172165	2.78831	0.0149992		x
p_Late_Vir-k_Exp0	1.40674	0.0986634	2.71481	0.0253967		x
p_Late_Vir-l_Exp1	1.75156	0.44349	3.05964	0.0019228	x	x
p_Late_Vir-n_Decline	1.67356	0.365489	2.98164	0.0035178	x	x

## Sheet: Sheet2
	diff	lwr	upr	p adj
g_Mid_Vir-b_Exp1	1.98249	0.674417	3.29056	0.0003105
h_Late_Vir-a_Exp0	1.83987	0.531795	3.14794	0.000962
h_Late_Vir-b_Exp1	2.37718	1.06911	3.68526	1.34e-05
j_Late_Vir-b_Exp1	2.04721	0.739137	3.35529	0.0001854
m_Early_Stat-a_Exp0	1.74357	0.4355	3.05165	0.0020462
m_Early_Stat-b_Exp1	2.28089	0.972813	3.58896	2.88e-05
o_Early_Vir-a_Exp0	1.84089	0.532819	3.14897	0.0009543
o_Early_Vir-b_Exp1	2.37821	1.07013	3.68628	1.33e-05
p_Late_Vir-a_Exp0	2.16433	0.856255	3.4724	7.28e-05
p_Late_Vir-b_Exp1	2.70164	1.39357	4.00972	1.1e-06
p_Late_Vir-d_Stationary	1.83923	0.531159	3.14731	0.0009669
p_Late_Vir-e_Decline	1.64471	0.336641	2.95279	0.0043884
p_Late_Vir-f_Early_Vir	1.74065	0.432581	3.04873	0.0020933
p_Late_Vir-l_Exp1	1.75156	0.44349	3.05964	0.0019228
p_Late_Vir-n_Decline	1.67356	0.365489	2.98164	0.0035178
