# Supplementary material for: Viral Infection Leads to a Unique Suite of Allelopathic Chemical Signals in Three Diatom Host–Virus Pairs
Source: Mar Drugs. 2024 May 17;22(5):228. doi: 10.3390/md22050228 (PMC11123003; doi:10.3390/md22050228)
Supplement: Supplementary file 1 [file marinedrugs-22-00228-s001.zip › Supplemental Table S6 positional annotation table March 2024.xlsx]

## Sheet: Sheet1
Table S6. Comparison of model ms2 fragmentation to the ms2 fragmentation of potentially allelopathic compounds that were upregulated in the experiments infecting diatom species belonging to the genus Chaetoceros with viruses. This analysis was completed in MSDIAL. Putative annotations were assigned on the basis of exact mass, retention time, and ms2. To decide between structural and positional is…
Experiment	LOBSTAHS Annotation	RT	m/z	LC method	RT	Postional Annotation	Dot Product	Reverse Dot Product	Presence	Annotation Notes
CsRNAV	NVO 16:2 1O	3.46	267.197	45%A-30 min June 2023	3.37	6-oxoHME	0.81	0.05	0.03	very strong 181 fragment that matches a lot of things
	NVO 16:2 1O	4.3	267.197	80% A- 30 min	11.9	5-epHME	0.7	0.65	0.18
	NVO 16:2 1O	4.8	267.197	80% A- 30 min	12.7	9-epHME	0.04	0.51	0.07
	NVO 16:3 1O	3.8	265.181	80% A- 30 min	10.81	9-epHDE	0.6	0.53	0.28
	NVO 16:3 1O	5.2	265.181			Not Fragmented
	NVO 16:4 1O	2.5	263.165	45%A-23 min	1.09	9-HHTE	0.34	0.52	0.72
	NVO 16:4 1O	3.1	263.165			not fragmented
	NVO 16:4 2O	1.8	279.16			poor isolation
	NVO 20:4 2O	3.8	335.223	45%A-23 min	1.22	13,14 diHETE	0.42	0.6	0.38
	NVO 20:4 2O	4	335.223	45%A-23 min	1.52	9,10 diHETE	0.39	0.5	0.4
	NVO 20:5 1O	4	317.212	80% A- 30 min	14.04	11-HEPE	0.37	0.66	0.43
	NVO 20:5 1O	4.9	317.212	80% A- 30 min	14.6	15-HEPE	0.37	0.54	0.59
	NVO 20:5 1O	5.6	317.212	80% A- 30 min	16.2	11-oxo ETE	0.33	0.64	0.46
	NVO 20:5 2O	2.2	333.207	80% A- 30 min	9.7	11,14 diHEPE	0.49	0.33	0.35	peak split with UPLC chromatography
	NVO 20:5 2O	2.2	333.207	80% A- 30 min	11.16	10,11 diHEPE	0.29	0.14	0.12
	NVO 20:5 2O	2.08	333.207	45%A-30 min June 2023	1.118	11,14 diHEPE	0.41	0.6	0.74	235 small but present not in library for competing annotation 10,11 diHEPE
				45%A-30 min June 2023		10,11 diHEPE	0.31	0.55	0.62	better major ion fragmentation 121.10069
	NVO 20:5 2O	2.7	333.207	80% A- 30 min	11.85	5,7 HepETE	0.21	0.11	0.33
	NVO 20:5 2O		333.207	45%A-30 min June 2023	1.392	5,7 HepETE	0.14	0.3	0.43
	NVO 20:5 2O	5.27	333.207	45%A-30 min June 2023	1.39	15-HpEPE	0.1	0.55	0.39	matches 219 fragment
	NVO 20:3 1O	8.06	321.244	45%A-30 min June 2023	3.62	15-oxoHDE				ms2 precision a little off so scores weren’t calculated
	NVO 20:3 1O	6.98	321.243	45%A-30 min June 2023	2.79	15-HETrE	0.03	0.04	0.08	ms2 precision a little off so scores weren’t calculated
	LOBSTAHS Annotation	RT	m/z	LC method	RT	Postional Annotation	Dot Product	Reverse Dot Product	Presence	Annotation Notes
CtRNAV	NVO 16:3 1O	3	265.181	45%A-23 min	1.27	9-HHTrE	0.32	0.62	0.18
	NVO 16:3 2O	2.1	281.176	45%A-23 min	1.04	6,8 HepHDE	0.62	0.61	0.17
	NVO 16:4 1O	2.5	263.165	45%A-23 min	1.12	9-HHTE	0.34	0.53	0.41
	NVO 16:4 1O	3.1	263.165	45%A-23 min	1.34	9-epHTrE	0.43	0.41	0.18
	NVO 16:4 2O	1.8	279.16	45%A-23 min		not retained
	NVO 16:4 2O	2.6	279.16	45%A-23 min	1.14	9-HpHTE	0.19	0	0.04
	NVO 16:4 2O	9.8	279.16	45%A-23 min		not fragmented
	NVO 20:5 2O	2.2	333.207	45%A-23 min	1.3	10,11 diHEPE	0.28	0.21	0.41
	NVO 20:5 2O	3.1	333.207	45%A-23 min	2	13,14 HepETE	0.26	0.14	0.42
	NVO 20:5 2O	5.3	333.207	45%A-23 min		not fragmented
	NVO 16:1 1O	4.37	269.212	45%A-30 min June 2023	1.772	9-HMME	0.83	0.62	0.12
	NVO 16:1 1O	5.77	269.212	45%A-30 min June 2023	2.371	? 9-HMME	0.67	0.38	0.03	only parent ion matches, fragmentation resolution bad at low end; Elution order different
	16:2 1O	2.2	267.197	45%A-30 min June 2023		not observed
	16:2 1O	3.46	267.197	45%A-30 min June 2023	1.448	5-epHME	0.69	0.64	0.16	matched 195 frag
	16:2 1O	4.28	267.197	45%A-30 min June 2023	1.772	9-oxoHME	0.76	0.5	0.17	matched 140 series
	20:4 1O	2.82	319.228	45%A-30 min June 2023	1.623	8-HETE	0.32	0.45	0.03	all the same but the ms2 accuracy is compromised such that the fragments don't align when we correct for this the 193 fragment as well as the 161 framgnet align.
	20:4 1O	5.95	319.228	45%A-30 min June 2023	2.396	9-HETE	0.3	0.07	0.43
	20:4 1O	6.82	319.228	45%A-30 min June 2023		no fragmentation
	20:5 2O	2.08	333.207	45%A-30 min June 2023	1.295	11,14- diHEPE	0.24	0.16	0.58
	20:5 2O	3.03	333.207	45%A-30 min June 2023	2.02	13,14-HepETE	0.26	0.1	0.14	has 111 fragment
	16:3 2O	2.23	281.176	45%A-30 min June 2023	1.049	9-HpHTrE	0.36	0.58	0.32
	16:3 2O	3.21	281.176	45%A-30 min June 2023	1.373	9,11-HepHDE	0.26	0.04	0.1
Experiment	LOBSTAHS Annotation	RT	m/z	method	RT	Postional Annotation	Dot Product	Reverse Dot Product	Presence
CtDNAV	NVO 16:3 1O	3	265.181	45%A-23 min	1.3	9-HHTrE	0.49	0.78	0.36
	NVO 16:3 1O	3.8	265.181	45%A-23 min		not fragmented
	NVO 16:4 1O	1.8	263.165	45%A-23 min		not observed
	NVO 16:4 1O	2.5	263.165	45%A-23 min	1.12	9-HHTE	0.32	0.55	0.55
	NVO 16:4 1O	2.9	263.165	45%A-23 min	1.373	9-epHTrE	0.49	0.54	0.33
	NVO 16:4 2O	1.8	279.16	45%A-23 min		no fragmentation
	NVO 16:4 2O	2.6	279.16	45%A-23 min		no fragmentation
	NVO 20:5 2O	2.2	333.207	45%A-23 min	1.3	10,11 diHEPE	0.26	0.21	0.46
	NVO 20:5 2O	3.1	333.207	45%A-23 min	2.02	13,14-HepETE	0.27	0.13	0.32
	NVO 16:2 1O	3.46	267.197	45%A-30 min June 2023	1.45	5-epHME	0.32	0.18	0.02
	NVO 16:3 2O	2.23	281.176	45%A-30 min June 2023	1.043	9-HpHTrE	0.48	0.59	0.21
	NVO 16:3 2O	3.21	281.176	45%A-30 min June 2023	1.369	6,8-HepHDE	0.16	0.02	0.02
	NVO 16:4 2O	1.85	279.16	45%A-30 min June 2023	1.143	9-HpHTE	0.27	0	0.03
	NVO 20:5 1O	4.91	317.212	45%A-30 min June 2023	1.871	15-HEPE	0.59	0.95	0.9
	NVO 20:5 2O	2.08	333.207	45%A-30 min June 2023	1.3	11,14 diHEPE	0.23	0.14	0.51
	NVO 20:5 2O	3.03	333.207	45%A-30 min June 2023	2.02	13,14-HepETE	0.26	0.019	0.42
