# Supplementary material for: Viral Infection Leads to a Unique Suite of Allelopathic Chemical Signals in Three Diatom Host–Virus Pairs
Source: Mar Drugs. 2024 May 17;22(5):228. doi: 10.3390/md22050228 (PMC11123003; doi:10.3390/md22050228)
Supplement: Supplementary file 1 [file marinedrugs-22-00228-s001.zip › Supplemental Table S7 unique Venn.xlsx]

## Sheet: Sheet1
Table S7. Unique compounds that were signifincantly more abundant in CtenDNAv, CtenRNAv, and CsfrRNAv lysis relative to the respective controls.
unique to CtDNAv	FFA 16:2 +1O_mz_267.1966_RT_4.28
	FFA 16:4_mz_247.1702_RT_3.01
	FFA 18:1 +1O_mz_297.2436_RT_6.66
	FFA 18:1 +1O_mz_297.2436_RT_7.73
	FFA 18:4 +1O_mz_291.1967_RT_3.83
	FFA 18:4 +1O_mz_291.1968_RT_2.94
	FFA 18:5_mz_273.1862_RT_7.25
	FFA 20:3 +2O_mz_337.2386_RT_4.38
	FFA 22:1 +1O_mz_353.3063_RT_9.48
	FFA 22:1_mz_337.3114_RT_13.19
	FFA 22:2 +2O_mz_367.2855_RT_7.77
unique to CtRNAv	FFA 14:2 +2O_mz_255.1601_RT_2.67
	FFA 16:1 +1O_mz_269.2123_RT_6.24
	FFA 18:2 +1O_mz_295.2279_RT_5.93
	FFA 18:3 +3O_mz_325.2021_RT_5.07
	FFA 18:3_mz_277.2173_RT_8.73
	FFA 18:4 +4O_mz_339.1812_RT_2.98
	FFA 20:1_mz_309.2801_RT_11.49
	FFA 20:2 +1O_mz_323.2592_RT_8.88
	FFA 20:3 +3O_mz_353.2335_RT_5.03
	FFA 22:3_mz_333.2801_RT_11.07
	FFA 22:3 +1O_mz_349.275_RT_8.74
	FFA 22:5 +2O_mz_361.2385_RT_8.42
	FFA 22:6_mz_327.2331_RT_8.89
	FFA 24:0_mz_367.3583_RT_15.75
unique to CsfrRNAv	FFA 16:4 +4O_mz_311.1502_RT_1.28
