# Supplementary material for: Viral Infection Leads to a Unique Suite of Allelopathic Chemical Signals in Three Diatom Host–Virus Pairs
Source: Mar Drugs. 2024 May 17;22(5):228. doi: 10.3390/md22050228 (PMC11123003; doi:10.3390/md22050228)
Supplement: Supplementary file 1 [file marinedrugs-22-00228-s001.zip › Supplemental table S8 oxylipin_standard_frag_vs_CFMID.xlsx]

## Sheet: Sheet1
Table S8. Comparison of the ms2 fragmentation of authentic oxylipin standards to predicted ms2 fragmentation for these compounds from CFMID. This comparison was completed in MSDIAL. Dot products ranged from 0.9 to 0.26. The Dot Product were much lower in the CFM-ID comparisons with longer carbon chain length oxylipins, but the Presence score stayed consistent. Thus we used these values as an acce…
	80:20 method (ms2 > 50 m/z)						45:55 method (ms > 100 m/z)
Standard	m/z	LOBSTAHs Annotation	RT	Dot Product	Reverse Dot Product	Presence	RT	Dot Product	Reverse Dot Product	Presence
7,17 dihydroxy docosapentaenoic acid	361.238	NVO C22:5 +2O	12.64	0.26	0.37	0.43	5.49	0.29	0.38	0.41
15-hydroxy eicosatetraenoic acid	319.228	NVO C20:4 +1O	16.02	0.55	0.61	0.31	9.62	0.56	0.58	0.36
12-hydroxy eicosatetraenoic acid	319.228	NVO C20:4 +1O	16.02	0.5	0.67	0.33	n.a.	n.a.	n.a.	n.a.
11-hydroxy eicosatetraenoic acid	319.228	NVO C20:4 +1O	16.44	0.4	0.36	0.34	9.97	0.41	0.35	0.3
5-hydroxy eicosatetraenoic acid	319.227	NVO C20:4 +1O	16.72	0.48	0.43	0.24	10.23	0.55	0.44	0.26
12,13 dihydroxy octadecaenoic acid	313.238	NVO C18:1 +2O	13.21	0.84	0.55	0.32	5.51	0.18	0.39	0.04	* very small peak; poor fragmentation
9,10 dihydroxy octadecaenoic acid	313.238	NVO C18:1 +2O	13.44	0.66	0.48	0.45	5.99	0.68	0.5	0.52
13-hydroxy octadecadienoic acid	295.227	NVO C18:2 +1O	15.7	0.83	0.69	0.35	9.12	0.88	0.7	0.33
12(13)- epoxy octadecaenoic acid	295.228	NVO C18:2 +1O	16.69	0.9	0.5	0.16	n.a.	n.a.	n.a.	n.a.
9(10)- epoxy octadecaenoic acid	295.228	NVO C18:2 +1O	16.99	0.7	0.61	0.37	11.33	0.71	0.64	0.34
13-oxo octadecadienoic acid	293.212	NVO C18:3 +1O	15.68	0.79	0.62	0.33	9.77	0.81	0.65	0.37
9-oxo octadecadienoic acid	293.212	NVO C18:3 +1O	15.851	0.85	0.6	0.29	10	0.84	0.6	0.25
